# Supplementary material for: Lineage tracing and single-cell analysis reveal proliferative Prom1+ tumour-propagating cells and their dynamic cellular transition during liver cancer progression
Source: HighWire-hosted journal article supplement (doi:10.1136/gutjnl-2021-324321), 2021-09-29
Supplement: gutjnl-2021-324321supp003_data_supplement.xlsx [file gutjnl-2021-324321supp003_data_supplement.xlsx]

## Sheet: Lineage markers
gene	p_val	avg_logFC	pct.1	pct.2	p_val_adj	cluster
Cd74	0	2.56853	0.504	0.085	0	MP
H2-Aa	0	2.35348	0.413	0.029	0	MP
H2-Ab1	0	2.34972	0.405	0.031	0	MP
Ctss	0	2.23879	0.486	0.036	0	MP
H2-Eb1	0	2.19415	0.359	0.024	0	MP
Cd5l	0	2.13518	0.363	0.034	0	MP
Lyz2	0	2.13425	0.425	0.032	0	MP
Fcer1g	0	2.1303	0.457	0.044	0	MP
Tmsb4x	0	2.12296	0.813	0.233	0	MP
Psap	0	2.07929	0.698	0.581	0	MP
Laptm5	0	1.96929	0.496	0.039	0	MP
Rgs1	0	1.96778	0.382	0.025	0	MP
C1qa	0	1.93928	0.412	0.031	0	MP
C1qc	0	1.91296	0.394	0.029	0	MP
Sdc3	0	1.85627	0.472	0.075	0	MP
Clec4f	0	1.82498	0.274	0.028	0	MP
C1qb	0	1.79873	0.368	0.029	0	MP
Tyrobp	0	1.77235	0.385	0.032	0	MP
Wfdc17	0	1.75939	0.362	0.038	0	MP
Mafb	0	1.73021	0.39	0.087	0	MP
Cyba	0	1.50933	0.385	0.071	0	MP
Lilr4b	0	1.47161	0.261	0.018	0	MP
Sirpa	0	1.45331	0.424	0.139	0	MP
Cybb	0	1.43528	0.309	0.035	0	MP
Fyb	0	1.4218	0.287	0.023	0	MP
Lcp1	0	1.41483	0.316	0.072	0	MP
Ptprc	0	1.41074	0.307	0.025	0	MP
Zeb2	0	1.383	0.376	0.06	0	MP
Csf1r	0	1.33507	0.268	0.018	0	MP
Aif1	0	1.33402	0.266	0.018	0	MP
Cd52	0	1.23802	0.254	0.028	0	MP
Gm42418	0	1.21389	1	1	0	MP
Malat1	0	1.20644	0.98	0.685	0	MP
Marcks	0	1.08662	0.429	0.124	0	MP
Maf	0	0.941752	0.459	0.164	0	MP
Actb	0	0.848187	0.838	0.877	0	MP
Rpl38	0	0.840605	0.918	0.92	0	MP
mt-Co1	0	0.645996	0.998	0.988	0	MP
Rps29	1.13701e-283	0.948018	0.776	0.779	3.53076e-279	MP
Crip1	5.42195e-283	1.3622	0.31	0.095	1.68368e-278	MP
Rpl37a	2.01526e-266	0.783093	0.821	0.864	6.25799e-262	MP
Gm10076	2.01661e-265	0.516633	0.933	0.97	6.26216e-261	MP
Dmpk	3.1011e-253	1.30699	0.274	0.081	9.62984e-249	MP
Rps28	1.30375e-250	0.856845	0.777	0.799	4.04853e-246	MP
Mrc1	4.32054e-247	0.844739	0.331	0.105	1.34166e-242	MP
Unc93b1	4.58164e-246	1.35644	0.345	0.134	1.42274e-241	MP
Mpeg1	3.91328e-234	1.55762	0.373	0.166	1.21519e-229	MP
Iqgap1	6.87295e-233	1.18531	0.313	0.111	2.13426e-228	MP
Ctsc	3.38462e-226	1.49633	0.332	0.133	1.05103e-221	MP
Rplp2	1.10874e-223	0.66299	0.798	0.895	3.44298e-219	MP
Lgmn	1.61838e-208	1.63047	0.547	0.416	5.02555e-204	MP
Ctsb	5.52391e-198	1.48502	0.64	0.664	1.71534e-193	MP
Rpl35a	1.92119e-190	0.798204	0.739	0.79	5.96586e-186	MP
mt-Atp6	2.48304e-183	0.574215	0.838	0.859	7.71058e-179	MP
Rps27a	1.0312e-172	0.472257	0.868	0.958	3.20219e-168	MP
mt-Co3	1.72167e-172	0.438085	0.946	0.963	5.34632e-168	MP
Slc40a1	1.94069e-168	1.63556	0.324	0.151	6.02644e-164	MP
Lyn	1.08549e-163	1.09412	0.264	0.103	3.37078e-159	MP
mt-Nd1	5.63248e-151	0.416604	0.868	0.862	1.74905e-146	MP
Sem1	2.2466e-149	0.67802	0.728	0.824	6.97636e-145	MP
Rps21	1.3064e-145	0.6645	0.751	0.849	4.05677e-141	MP
BC005537	6.82405e-140	1.22536	0.342	0.183	2.11907e-135	MP
Vcam1	1.67104e-116	1.37001	0.283	0.142	5.18909e-112	MP
Tmsb10	1.48844e-103	0.930979	0.594	0.544	4.62205e-99	MP
Rpl41	6.42753e-103	0.497426	0.757	0.887	1.99594e-98	MP
Rplp1	5.50914e-93	0.537637	0.699	0.838	1.71075e-88	MP
Rps8	7.5972e-93	0.321728	0.88	0.962	2.35916e-88	MP
Tnfaip2	4.35236e-91	1.13035	0.256	0.136	1.35154e-86	MP
Sash1	5.05304e-90	0.824493	0.284	0.153	1.56912e-85	MP
Tln1	7.53133e-90	0.9576	0.331	0.204	2.3387e-85	MP
Acp5	1.99276e-85	0.268086	0.149	0.415	6.18812e-81	MP
Mycbp2	1.1865e-82	0.943215	0.288	0.168	3.68445e-78	MP
Tcirg1	2.63307e-79	1.01409	0.252	0.141	8.17648e-75	MP
mt-Co2	5.64124e-74	0.281852	0.944	0.965	1.75177e-69	MP
Rpl23	7.65103e-74	0.324	0.788	0.925	2.37587e-69	MP
Grn	3.62019e-73	1.35793	0.434	0.399	1.12418e-68	MP
Syngr2	1.07852e-72	0.250686	0.089	0.282	3.34914e-68	MP
Atp2b1	3.02778e-71	1.12607	0.314	0.215	9.40217e-67	MP
Ctsh	1.72965e-70	0.342853	0.183	0.448	5.37109e-66	MP
Anp32b	1.78988e-69	0.262857	0.177	0.43	5.5581e-65	MP
Fau	5.83205e-69	0.477117	0.811	0.932	1.81103e-64	MP
Ggnbp2	1.17695e-68	0.275207	0.128	0.342	3.65479e-64	MP
Nap1l1	1.62282e-67	0.296266	0.166	0.407	5.03935e-63	MP
Sft2d1	8.1631e-66	0.324824	0.177	0.427	2.53489e-61	MP
Pcbp2	1.15313e-63	0.298012	0.17	0.408	3.58081e-59	MP
Sh3bgrl3	4.5804e-63	0.943732	0.259	0.16	1.42235e-58	MP
Rab14	5.48651e-63	0.289043	0.213	0.486	1.70373e-58	MP
Ier3ip1	4.09844e-61	0.27504	0.169	0.399	1.27269e-56	MP
Lypla2	1.13378e-60	0.315886	0.131	0.333	3.52074e-56	MP
Lipa	1.62545e-60	0.379172	0.162	0.391	5.04751e-56	MP
Rab5c	1.98704e-60	0.252515	0.108	0.292	6.17034e-56	MP
Gcc2	4.28261e-60	0.254288	0.139	0.344	1.32988e-55	MP
Lrp1	2.48898e-59	1.17977	0.352	0.283	7.72902e-55	MP
Ucp2	3.95369e-59	1.03326	0.292	0.204	1.22774e-54	MP
Rbm7	9.09954e-59	0.270321	0.099	0.273	2.82568e-54	MP
Eif3c	1.66121e-58	0.271833	0.212	0.471	5.15854e-54	MP
Psme1	1.11223e-57	0.257014	0.26	0.559	3.45381e-53	MP
Dpm3	1.15327e-57	0.263789	0.257	0.55	3.58126e-53	MP
Hnrnpdl	3.08151e-57	0.330059	0.143	0.347	9.56902e-53	MP
G3bp2	1.05348e-56	0.305298	0.134	0.329	3.27136e-52	MP
Asah1	1.30865e-56	0.335745	0.128	0.322	4.06376e-52	MP
Naa50	6.59694e-54	0.256224	0.097	0.262	2.04855e-49	MP
Erp29	9.81035e-54	0.362781	0.198	0.441	3.04641e-49	MP
Tm9sf3	2.76258e-53	0.284522	0.196	0.43	8.57863e-49	MP
Macf1	4.0799e-53	0.680593	0.296	0.195	1.26693e-48	MP
Abracl	3.56725e-52	0.358512	0.144	0.34	1.10774e-47	MP
Mbnl1	5.76393e-51	0.957024	0.316	0.238	1.78987e-46	MP
Dusp11	1.82423e-50	0.303926	0.139	0.324	5.66477e-46	MP
Chmp4b	2.58817e-50	0.290686	0.155	0.354	8.03705e-46	MP
Rab10	2.76779e-50	0.272112	0.118	0.29	8.59483e-46	MP
M6pr	9.80162e-50	0.371766	0.154	0.354	3.0437e-45	MP
Hp1bp3	2.77744e-49	0.25332	0.118	0.287	8.62479e-45	MP
Lpin2	6.62326e-49	0.283865	0.124	0.298	2.05672e-44	MP
Zranb2	9.22748e-49	0.283261	0.16	0.356	2.86541e-44	MP
Taf6l	1.46698e-48	0.307305	0.103	0.261	4.5554e-44	MP
Ik	3.91952e-48	0.323238	0.119	0.288	1.21713e-43	MP
Rbm8a	3.94723e-48	0.283293	0.132	0.307	1.22573e-43	MP
Arpc4	1.01681e-47	0.377356	0.171	0.377	3.15749e-43	MP
Rpl23a	1.55047e-47	0.303588	0.267	0.545	4.81467e-43	MP
Kif5b	2.73395e-46	0.26224	0.131	0.302	8.48974e-42	MP
Set	4.63451e-46	0.271279	0.152	0.335	1.43916e-41	MP
Abcf1	5.50704e-46	0.301132	0.109	0.267	1.7101e-41	MP
Nol7	1.52964e-45	0.266609	0.289	0.58	4.75e-41	MP
Ccnl2	7.76643e-45	0.252463	0.109	0.261	2.41171e-40	MP
Rps24	8.96208e-45	0.264944	0.803	0.935	2.783e-40	MP
Nr1h3	1.56284e-44	0.51199	0.145	0.328	4.8531e-40	MP
Cox7c	7.06541e-44	0.354587	0.735	0.896	2.19402e-39	MP
Eif4h	1.96161e-43	0.294272	0.118	0.276	6.09139e-39	MP
Gsr	2.69527e-43	0.375126	0.152	0.334	8.36962e-39	MP
Capzb	7.62525e-43	0.386915	0.253	0.518	2.36787e-38	MP
Gm2a	1.78317e-42	0.510435	0.185	0.396	5.53729e-38	MP
Psmb9	2.55414e-42	0.33189	0.117	0.272	7.93137e-38	MP
Polr2l	2.5877e-42	0.301086	0.318	0.621	8.03558e-38	MP
Nars	4.99049e-42	0.344116	0.223	0.454	1.5497e-37	MP
Vcp	1.16507e-41	0.257848	0.256	0.504	3.6179e-37	MP
Son	8.26132e-41	0.80169	0.458	0.461	2.56539e-36	MP
Rpl35	2.26918e-40	0.340479	0.696	0.88	7.04649e-36	MP
Srrm1	1.28244e-39	0.410945	0.185	0.384	3.98237e-35	MP
Caprin1	1.55749e-38	0.314037	0.143	0.305	4.83648e-34	MP
Sf1	1.56009e-38	0.322964	0.122	0.271	4.84456e-34	MP
Hectd1	2.09959e-38	0.283798	0.115	0.258	6.51984e-34	MP
Dnajc8	1.35404e-36	0.317814	0.149	0.31	4.20469e-32	MP
Epn1	2.61964e-36	0.438422	0.158	0.33	8.13478e-32	MP
Txn1	3.51162e-36	0.347251	0.302	0.588	1.09046e-31	MP
Snx6	3.23353e-35	0.362148	0.15	0.311	1.00411e-30	MP
Pdcd6ip	5.45967e-35	0.265701	0.13	0.275	1.69539e-30	MP
Xrn2	1.23564e-34	0.386646	0.137	0.288	3.83704e-30	MP
Jak1	3.29069e-34	0.30981	0.186	0.364	1.02186e-29	MP
Srsf2	3.69642e-34	0.426258	0.189	0.376	1.14785e-29	MP
Cd47	5.57336e-34	0.360346	0.275	0.53	1.7307e-29	MP
Lasp1	8.26787e-34	0.257569	0.13	0.27	2.56742e-29	MP
Hnrnpu	3.23097e-33	0.387134	0.224	0.433	1.00331e-28	MP
Mapre1	4.53545e-33	0.279378	0.128	0.267	1.40839e-28	MP
Spop	8.44859e-33	0.328687	0.131	0.272	2.62354e-28	MP
Scand1	1.17017e-32	0.439562	0.258	0.501	3.63372e-28	MP
Csnk2a1	2.17335e-32	0.308429	0.131	0.27	6.74891e-28	MP
Ctsa	3.5938e-32	0.551835	0.186	0.373	1.11598e-27	MP
Nptn	3.71022e-32	0.398628	0.142	0.291	1.15214e-27	MP
Srsf11	4.29155e-32	0.385331	0.172	0.34	1.33265e-27	MP
Ndufa3	4.53638e-32	0.254759	0.377	0.703	1.40868e-27	MP
Npm1	8.19837e-32	0.349477	0.288	0.547	2.54584e-27	MP
Dazap2	8.38904e-32	0.45063	0.198	0.386	2.60505e-27	MP
Nfe2l2	9.24423e-32	0.395138	0.146	0.296	2.87061e-27	MP
Mtdh	9.85595e-32	0.37553	0.239	0.456	3.06057e-27	MP
Btg1	1.52284e-31	1.00321	0.309	0.266	4.72887e-27	MP
Ywhah	2.66407e-31	0.441639	0.227	0.436	8.27274e-27	MP
Rack1	7.67201e-31	0.318238	0.316	0.597	2.38239e-26	MP
Rpl22	2.18783e-30	0.484127	0.612	0.819	6.79385e-26	MP
Llph	3.00795e-30	0.426727	0.266	0.505	9.34057e-26	MP
Hexa	3.80993e-30	0.493283	0.171	0.339	1.1831e-25	MP
Tcea1	1.52321e-29	0.363731	0.28	0.524	4.73003e-25	MP
Man2b1	1.68165e-29	0.962223	0.261	0.211	5.22201e-25	MP
Ddx39b	3.31217e-29	0.457829	0.18	0.346	1.02853e-24	MP
Snx2	5.04785e-29	0.353481	0.128	0.258	1.56751e-24	MP
Sat1	8.30718e-29	1.14217	0.442	0.519	2.57963e-24	MP
Srsf10	1.85176e-28	0.339694	0.144	0.282	5.75028e-24	MP
AW112010	2.65301e-28	0.504831	0.211	0.4	8.2384e-24	MP
Ddx24	9.32949e-28	0.422557	0.188	0.356	2.89709e-23	MP
Sh3glb1	1.18091e-27	0.425782	0.261	0.489	3.66709e-23	MP
Ostf1	4.00998e-27	0.397342	0.163	0.311	1.24522e-22	MP
Fcgrt	1.46411e-26	0.418912	0.174	0.327	4.5465e-22	MP
Lamp1	2.98115e-26	0.556514	0.547	0.721	9.25738e-22	MP
Tomm7	3.01916e-26	0.326576	0.339	0.618	9.3754e-22	MP
Serpinb6a	6.00641e-26	0.370638	0.159	0.3	1.86517e-21	MP
Ccdc50	7.70177e-25	0.457249	0.148	0.283	2.39163e-20	MP
H2-D1	1.49651e-24	0.575439	0.532	0.678	4.64711e-20	MP
Gnai2	1.80088e-24	0.741054	0.303	0.264	5.59228e-20	MP
Dek	1.81596e-24	0.410131	0.175	0.324	5.63909e-20	MP
Pkn2	1.88878e-24	0.382003	0.2	0.362	5.86522e-20	MP
Metap2	2.06531e-24	0.371538	0.287	0.517	6.41341e-20	MP
Scarb2	3.93642e-24	0.341197	0.148	0.277	1.22238e-19	MP
Nsa2	5.31194e-23	0.473051	0.26	0.47	1.64952e-18	MP
Itm2c	7.52109e-23	0.428762	0.271	0.485	2.33552e-18	MP
Srsf3	8.7257e-23	0.448292	0.188	0.34	2.70959e-18	MP
Smarca5	1.04128e-22	0.345745	0.152	0.278	3.23348e-18	MP
Scaf11	2.02461e-22	0.40477	0.162	0.296	6.28703e-18	MP
Eif4a1	2.04297e-22	0.528925	0.224	0.406	6.34403e-18	MP
Hnrnpl	8.43037e-22	0.396056	0.181	0.323	2.61788e-17	MP
Man2a1	1.46125e-21	0.292211	0.162	0.286	4.53762e-17	MP
Cbx3	2.61202e-21	0.3708	0.194	0.34	8.1111e-17	MP
Arhgdia	6.60743e-21	0.518627	0.206	0.369	2.0518e-16	MP
Ppp1r15a	1.46705e-20	0.443128	0.149	0.269	4.55562e-16	MP
Csde1	1.61693e-20	0.432614	0.171	0.304	5.02106e-16	MP
B230219D22Rik	2.71675e-20	0.374943	0.184	0.321	8.43631e-16	MP
Wdr1	2.85241e-20	0.435876	0.173	0.308	8.85759e-16	MP
Eif4g2	2.89941e-20	0.331382	0.293	0.503	9.00355e-16	MP
Srsf6	4.12208e-20	0.371329	0.139	0.251	1.28003e-15	MP
Tpd52	4.79909e-20	0.497232	0.138	0.254	1.49026e-15	MP
Tuba1b	1.2851e-19	0.45965	0.276	0.482	3.99063e-15	MP
Acin1	2.19016e-19	0.434663	0.145	0.259	6.80112e-15	MP
S100a13	2.80932e-19	0.317722	0.148	0.259	8.72377e-15	MP
AC149090.1	4.80431e-19	0.828902	0.262	0.23	1.49188e-14	MP
U2surp	6.83715e-19	0.449243	0.156	0.276	2.12314e-14	MP
Rps15	5.42262e-18	0.30383	0.384	0.68	1.68389e-13	MP
Tkt	5.95227e-18	0.55057	0.237	0.414	1.84836e-13	MP
H2afy	2.95387e-17	0.463425	0.149	0.26	9.17266e-13	MP
Atp5k	3.99367e-17	0.438912	0.33	0.57	1.24015e-12	MP
Sf3b2	1.98667e-16	0.425055	0.172	0.292	6.1692e-12	MP
Dusp1	2.35484e-16	0.899361	0.284	0.268	7.31248e-12	MP
Tpm3	3.54374e-16	0.767095	0.442	0.536	1.10044e-11	MP
Ccdc12	2.48839e-15	0.526025	0.161	0.275	7.7272e-11	MP
Gm26917	5.38159e-15	0.74898	0.369	0.376	1.67115e-10	MP
Cox17	5.70349e-15	0.444914	0.329	0.554	1.7711e-10	MP
Csnk1a1	6.77144e-15	0.442029	0.255	0.423	2.10274e-10	MP
Id3	1.45464e-14	0.750927	0.354	0.366	4.5171e-10	MP
Txnrd1	2.41184e-14	0.472456	0.164	0.273	7.4895e-10	MP
Eif3j1	8.32796e-14	0.41667	0.294	0.483	2.58608e-09	MP
Romo1	8.40921e-14	0.353661	0.392	0.659	2.61131e-09	MP
Bnip2	9.4808e-14	0.39988	0.162	0.264	2.94407e-09	MP
Atp6v0b	2.22507e-13	0.430294	0.335	0.582	6.90951e-09	MP
St3gal5	3.22139e-13	0.619035	0.26	0.436	1.00034e-08	MP
Arpc5	1.91313e-12	0.594719	0.245	0.408	5.94085e-08	MP
Hsp90aa1	4.16605e-12	0.504996	0.213	0.341	1.29368e-07	MP
Rps19	7.29747e-12	0.257123	0.424	0.716	2.26608e-07	MP
Pak2	8.05762e-12	0.489466	0.188	0.302	2.50213e-07	MP
Cebpb	9.47051e-12	0.588043	0.296	0.497	2.94088e-07	MP
Zfand5	1.03255e-11	0.556921	0.232	0.375	3.20636e-07	MP
1810037I17Rik	1.05611e-11	0.420955	0.331	0.543	3.27954e-07	MP
Txnip	1.16846e-11	0.311922	0.194	0.3	3.62842e-07	MP
Cltc	3.42208e-11	0.502448	0.203	0.323	1.06266e-06	MP
Bola2	4.30288e-11	0.528187	0.275	0.444	1.33617e-06	MP
Nucks1	4.34794e-11	0.376676	0.16	0.251	1.35016e-06	MP
Lpl	1.1178e-10	0.804843	0.228	0.373	3.4711e-06	MP
Irf2bp2	1.78563e-10	0.748453	0.268	0.263	5.54492e-06	MP
Cd2ap	3.88822e-10	0.434788	0.189	0.291	1.20741e-05	MP
Eif2s2	4.9906e-10	0.296419	0.41	0.678	1.54973e-05	MP
Neat1	5.33436e-10	0.389376	0.248	0.378	1.65648e-05	MP
Arl6ip1	1.32724e-09	0.573607	0.276	0.445	4.12147e-05	MP
H2-K1	1.50719e-09	0.296179	0.577	0.731	4.68029e-05	MP
Ewsr1	2.25273e-09	0.516397	0.199	0.308	6.99542e-05	MP
Cggbp1	2.63654e-09	0.48692	0.214	0.33	8.18726e-05	MP
Canx	4.88124e-09	0.414616	0.347	0.558	0.000151577	MP
Jun	7.76701e-09	0.257012	0.342	0.508	0.000241189	MP
Rps9	1.07315e-08	0.441911	0.545	0.769	0.000333244	MP
Zfp36	1.1004e-08	0.381864	0.324	0.506	0.000341706	MP
Fus	1.38147e-08	0.626021	0.358	0.394	0.000428987	MP
Serinc3	1.59819e-08	0.450608	0.238	0.359	0.000496287	MP
Hnrnpm	4.01262e-08	0.514843	0.215	0.328	0.00124604	MP
Ifngr1	5.14567e-08	0.660111	0.219	0.341	0.00159788	MP
Rps23	8.90093e-08	0.458143	0.534	0.758	0.00276401	MP
Rap1b	1.24126e-07	0.557571	0.173	0.261	0.00385449	MP
Actr3	2.13919e-07	0.938153	0.317	0.367	0.00664282	MP
App	2.94454e-07	0.296739	0.213	0.304	0.00914366	MP
Tcf25	3.35147e-07	0.539026	0.291	0.453	0.0104073	MP
Tpr	4.57524e-07	0.565857	0.283	0.441	0.0142075	MP
Srrm2	5.241e-07	0.718084	0.398	0.496	0.0162749	MP
Cdc42	5.92723e-07	0.588426	0.472	0.658	0.0184058	MP
mt-Nd3	2.28039e-06	0.529269	0.226	0.331	0.0708129	MP
Rpl39	5.57568e-06	0.387045	0.563	0.803	0.173142	MP
Rbm39	7.76179e-06	0.642097	0.403	0.505	0.241027	MP
Rpl36a	1.22187e-05	0.387542	0.545	0.779	0.379427	MP
Id2	1.27792e-05	0.631846	0.33	0.524	0.396834	MP
Rpl17	1.75783e-05	0.392995	0.418	0.682	0.545858	MP
Junb	1.8112e-05	0.615133	0.444	0.579	0.562432	MP
Top1	1.86944e-05	0.583581	0.266	0.398	0.580516	MP
Lars2	2.05381e-05	0.476733	0.479	0.613	0.637769	MP
Ctsd	2.8282e-05	1.17567	0.381	0.511	0.878241	MP
Luc7l2	3.0988e-05	0.528528	0.245	0.355	0.962269	MP
Ptbp3	4.08202e-05	0.665004	0.26	0.274	1	MP
Eif5b	6.61662e-05	0.732772	0.324	0.38	1	MP
Fos	0.00011173	0.301078	0.351	0.495	1	MP
Rps12	0.000126502	0.477066	0.518	0.737	1	MP
Npc2	0.000132634	0.668555	0.324	0.515	1	MP
Atpif1	0.000237729	0.526872	0.486	0.689	1	MP
Myl6	0.000291845	0.273683	0.568	0.807	1	MP
Ptma	0.000424873	0.289373	0.549	0.76	1	MP
Hpgd	0.00126748	0.849104	0.242	0.352	1	MP
Sfpq	0.00196588	0.4875	0.195	0.263	1	MP
Snrnp70	0.00458143	0.641407	0.346	0.427	1	MP
Sod1	0.00610052	0.451875	0.265	0.359	1	MP
Ddx5	0.0090036	0.540465	0.355	0.532	1	MP
Serpina1e	0	2.93899	0.973	0.467	0	HCC
Serpina1b	0	2.63194	0.995	0.729	0	HCC
Ahsg	0	2.52933	0.986	0.395	0	HCC
Serpina1d	0	2.44832	0.964	0.291	0	HCC
Ass1	0	2.43214	0.925	0.177	0	HCC
Rbp4	0	2.26422	0.992	0.635	0	HCC
Hrg	0	2.20728	0.826	0.099	0	HCC
Serpina3k	0	2.19471	0.965	0.362	0	HCC
Kng1	0	2.11042	0.982	0.49	0	HCC
Fga	0	2.10338	0.948	0.279	0	HCC
H2-Q10	0	2.08923	0.933	0.212	0	HCC
Fgg	0	2.08065	0.964	0.351	0	HCC
Gnmt	0	2.02976	0.866	0.118	0	HCC
Orm1	0	1.96659	0.87	0.174	0	HCC
Gapdh	0	1.96577	0.931	0.332	0	HCC
Ttr	0	1.96049	0.998	0.896	0	HCC
Hpx	0	1.90084	0.967	0.341	0	HCC
Apoa1	0	1.89547	1	0.989	0	HCC
Alb	0	1.85792	1	0.98	0	HCC
Hp	0	1.85114	0.977	0.346	0	HCC
Uox	0	1.84535	0.915	0.189	0	HCC
Gstm1	0	1.79262	0.925	0.313	0	HCC
Cyp2c70	0	1.74228	0.808	0.114	0	HCC
Azgp1	0	1.73759	0.881	0.154	0	HCC
Ttc36	0	1.73528	0.895	0.171	0	HCC
Gstp1	0	1.73311	0.984	0.607	0	HCC
F2	0	1.72419	0.803	0.134	0	HCC
Cyp2a4	0	1.72128	0.781	0.109	0	HCC
C8g	0	1.70383	0.823	0.107	0	HCC
Serpina3m	0	1.6933	0.833	0.113	0	HCC
Rida	0	1.68842	0.891	0.188	0	HCC
Fdps	0	1.66187	0.826	0.13	0	HCC
Nme2	0	1.6544	0.88	0.225	0	HCC
Mgst1	0	1.65259	0.955	0.353	0	HCC
Serpinc1	0	1.60809	0.899	0.198	0	HCC
Igfbp1	0	1.60794	0.917	0.269	0	HCC
Lcn2	0	1.5979	0.897	0.211	0	HCC
Fabp1	0	1.56635	0.94	0.492	0	HCC
Cyb5a	0	1.56559	0.96	0.424	0	HCC
Pcbd1	0	1.53214	0.83	0.135	0	HCC
Cfi	0	1.52874	0.825	0.153	0	HCC
Fgb	0	1.51618	0.98	0.544	0	HCC
Lrg1	0	1.48747	0.828	0.221	0	HCC
Tdo2	0	1.48469	0.793	0.136	0	HCC
Gstm3	0	1.46988	0.422	0.036	0	HCC
Serpinf2	0	1.45316	0.78	0.144	0	HCC
Ddt	0	1.44671	0.878	0.185	0	HCC
Mpc1	0	1.4117	0.841	0.197	0	HCC
Apcs	0	1.40673	0.878	0.259	0	HCC
Mup20	0	1.40331	0.928	0.395	0	HCC
Cyp2a12	0	1.40052	0.683	0.052	0	HCC
Apom	0	1.392	0.971	0.427	0	HCC
Lect2	0	1.39095	0.605	0.058	0	HCC
Asgr1	0	1.37805	0.803	0.104	0	HCC
Apoh	0	1.37011	0.912	0.24	0	HCC
Aldob	0	1.36766	0.827	0.16	0	HCC
Fth1	0	1.36701	0.969	0.566	0	HCC
Apoa2	0	1.35928	0.997	0.883	0	HCC
Sc5d	0	1.35735	0.779	0.12	0	HCC
Pzp	0	1.3333	0.769	0.2	0	HCC
Ppib	0	1.33162	0.871	0.259	0	HCC
Hpd	0	1.32673	0.644	0.045	0	HCC
Angptl8	0	1.32534	0.575	0.051	0	HCC
Cd302	0	1.31569	0.762	0.136	0	HCC
Angptl3	0	1.30677	0.761	0.109	0	HCC
Adh1	0	1.30206	0.853	0.195	0	HCC
Apof	0	1.30183	0.797	0.143	0	HCC
Cpb2	0	1.29493	0.785	0.115	0	HCC
Phyh	0	1.28588	0.804	0.152	0	HCC
Tmem205	0	1.27347	0.852	0.19	0	HCC
Gchfr	0	1.26428	0.8	0.129	0	HCC
Fetub	0	1.26252	0.757	0.11	0	HCC
Apoc3	0	1.25994	0.999	0.939	0	HCC
Scp2	0	1.25835	0.918	0.34	0	HCC
Slc25a47	0	1.25677	0.651	0.055	0	HCC
Pnpla7	0	1.25663	0.81	0.149	0	HCC
Fah	0	1.25261	0.697	0.079	0	HCC
Mup3	0	1.2472	0.603	0.089	0	HCC
Gamt	0	1.24104	0.711	0.098	0	HCC
Chchd10	0	1.23922	0.808	0.158	0	HCC
Tmem37	0	1.2358	0.662	0.081	0	HCC
Rdh16f2	0	1.23352	0.713	0.064	0	HCC
Krt18	0	1.21457	0.879	0.164	0	HCC
Ly6d	0	1.20153	0.862	0.254	0	HCC
Pck1	0	1.19742	0.7	0.131	0	HCC
Ambp	0	1.19651	0.943	0.351	0	HCC
Pemt	0	1.19599	0.624	0.041	0	HCC
Trf	0	1.18922	0.864	0.491	0	HCC
P4hb	0	1.18886	0.853	0.314	0	HCC
Fbp1	0	1.18147	0.788	0.145	0	HCC
Pold4	0	1.17899	0.735	0.12	0	HCC
Serpina12	0	1.17744	0.763	0.119	0	HCC
Fabp5	0	1.17563	0.814	0.215	0	HCC
Cfb	0	1.17543	0.669	0.096	0	HCC
Ifi27l2b	0	1.17006	0.772	0.13	0	HCC
Bsg	0	1.16562	0.894	0.291	0	HCC
Vtn	0	1.16556	0.829	0.199	0	HCC
Rarres2	0	1.16393	0.816	0.165	0	HCC
Gsta3	0	1.1638	0.776	0.142	0	HCC
Kng2	0	1.1609	0.785	0.141	0	HCC
Gc	0	1.15439	0.959	0.449	0	HCC
Atp5g1	0	1.14178	0.862	0.233	0	HCC
Apoc1	0	1.13376	0.994	0.819	0	HCC
Nrn1	0	1.13297	0.775	0.142	0	HCC
Serpind1	0	1.13043	0.709	0.108	0	HCC
Cyp2d26	0	1.12805	0.691	0.084	0	HCC
Scd1	0	1.11979	0.795	0.256	0	HCC
Ssr4	0	1.11838	0.824	0.226	0	HCC
Glud1	0	1.11836	0.882	0.336	0	HCC
Stard10	0	1.10398	0.794	0.162	0	HCC
Grhpr	0	1.10248	0.648	0.083	0	HCC
Mt1	0	1.09418	0.953	0.498	0	HCC
Apoa4	0	1.08977	0.666	0.089	0	HCC
Gstt1	0	1.08851	0.675	0.097	0	HCC
Igfbp2	0	1.08186	0.602	0.046	0	HCC
Prdx6	0	1.08125	0.783	0.167	0	HCC
Afp	0	1.07524	0.611	0.118	0	HCC
Tat	0	1.07146	0.723	0.129	0	HCC
Sult1a1	0	1.06912	0.722	0.121	0	HCC
Bhmt	0	1.06773	0.682	0.128	0	HCC
C4bp	0	1.05373	0.706	0.101	0	HCC
Plg	0	1.05344	0.719	0.129	0	HCC
Spp2	0	1.05273	0.709	0.088	0	HCC
Cfhr2	0	1.05167	0.704	0.097	0	HCC
Gstz1	0	1.04991	0.702	0.095	0	HCC
Prdx1	0	1.04524	0.963	0.56	0	HCC
Tstd1	0	1.04265	0.892	0.266	0	HCC
Haao	0	1.03615	0.594	0.031	0	HCC
Akr1c6	0	1.03615	0.732	0.142	0	HCC
Tubb2a	0	1.03394	0.696	0.132	0	HCC
Qdpr	0	1.02998	0.716	0.12	0	HCC
Comt	0	1.02001	0.723	0.141	0	HCC
Tst	0	1.0189	0.684	0.107	0	HCC
Ebp	0	1.00908	0.662	0.088	0	HCC
Ces1c	0	1.0032	0.629	0.066	0	HCC
Mettl7b	0	0.998059	0.672	0.077	0	HCC
Cbr1	0	0.997063	0.654	0.101	0	HCC
Cyp2c68	0	0.996632	0.702	0.091	0	HCC
F10	0	0.993968	0.657	0.071	0	HCC
Itih3	0	0.990702	0.657	0.083	0	HCC
Akr1c18	0	0.990019	0.768	0.139	0	HCC
Agt	0	0.989631	0.674	0.1	0	HCC
Serpinf1	0	0.9873	0.654	0.089	0	HCC
Agpat2	0	0.983083	0.584	0.072	0	HCC
Urah	0	0.980974	0.74	0.129	0	HCC
Esd	0	0.980917	0.775	0.202	0	HCC
Ahcy	0	0.98037	0.614	0.072	0	HCC
Fgl1	0	0.979196	0.702	0.091	0	HCC
Proc	0	0.978349	0.632	0.094	0	HCC
Rnase4	0	0.973484	0.472	0.069	0	HCC
Atp5d	0	0.97207	0.762	0.185	0	HCC
Hacd2	0	0.96899	0.654	0.09	0	HCC
Apoc4	0	0.959901	0.978	0.561	0	HCC
Cyp2d10	0	0.959566	0.665	0.085	0	HCC
Tpi1	0	0.957064	0.749	0.189	0	HCC
Hgfac	0	0.955252	0.593	0.047	0	HCC
Mdh1	0	0.95263	0.807	0.234	0	HCC
Fkbp11	0	0.952482	0.737	0.141	0	HCC
Atp5g3	0	0.951178	0.963	0.542	0	HCC
Hsd17b2	0	0.950346	0.609	0.074	0	HCC
Cyp1a2	0	0.947661	0.374	0.028	0	HCC
Gpx4	0	0.94667	0.885	0.312	0	HCC
A2ml1	0	0.942773	0.693	0.139	0	HCC
Gsta4	0	0.941967	0.627	0.082	0	HCC
Edf1	0	0.935362	0.754	0.191	0	HCC
Agxt	0	0.935281	0.595	0.036	0	HCC
Itih4	0	0.933593	0.669	0.123	0	HCC
Rdh7	0	0.929148	0.613	0.061	0	HCC
Slc27a2	0	0.92892	0.604	0.06	0	HCC
Serpina3n	0	0.928626	0.579	0.042	0	HCC
Mpc2	0	0.928067	0.885	0.293	0	HCC
Acsl5	0	0.924268	0.684	0.146	0	HCC
Ldha	0	0.918681	0.801	0.282	0	HCC
Cideb	0	0.918097	0.629	0.075	0	HCC
Serping1	0	0.913547	0.743	0.168	0	HCC
Gjb1	0	0.908131	0.662	0.088	0	HCC
Etfa	0	0.907017	0.702	0.138	0	HCC
Sephs2	0	0.905886	0.676	0.117	0	HCC
Selenbp1	0	0.903896	0.602	0.084	0	HCC
Uqcrfs1	0	0.90383	0.732	0.17	0	HCC
Atp5c1	0	0.902631	0.757	0.188	0	HCC
Cps1	0	0.901826	0.591	0.078	0	HCC
Ninj1	0	0.900956	0.698	0.141	0	HCC
Dhcr24	0	0.88627	0.597	0.095	0	HCC
Apoe	0	0.879118	0.992	0.78	0	HCC
Cyp3a11	0	0.878116	0.667	0.132	0	HCC
Avpi1	0	0.875262	0.666	0.102	0	HCC
Chchd2	0	0.875101	0.934	0.454	0	HCC
Ces2e	0	0.869489	0.684	0.127	0	HCC
Pgrmc1	0	0.869262	0.731	0.153	0	HCC
Adh5	0	0.868455	0.666	0.125	0	HCC
Echs1	0	0.865967	0.7	0.137	0	HCC
Cdo1	0	0.865476	0.744	0.14	0	HCC
Ppa1	0	0.859197	0.677	0.114	0	HCC
Hsd17b13	0	0.856307	0.677	0.112	0	HCC
Rpl29	0	0.856059	0.82	0.285	0	HCC
Hmgcl	0	0.85375	0.64	0.092	0	HCC
1300017J02Rik	0	0.853276	0.587	0.056	0	HCC
Serpina1a	0	0.851745	0.874	0.462	0	HCC
Sigmar1	0	0.849737	0.613	0.089	0	HCC
Ifi27	0	0.845693	0.713	0.158	0	HCC
Slc38a3	0	0.843855	0.604	0.061	0	HCC
Arg1	0	0.842512	0.703	0.132	0	HCC
Reep6	0	0.836956	0.573	0.048	0	HCC
Aqp8	0	0.835752	0.518	0.03	0	HCC
Pxmp2	0	0.835678	0.644	0.085	0	HCC
Sdhb	0	0.83354	0.687	0.15	0	HCC
Atp6v0c	0	0.832171	0.628	0.138	0	HCC
Ftl1	0	0.831816	0.975	0.677	0	HCC
Masp2	0	0.831311	0.577	0.049	0	HCC
S100a10	0	0.831262	0.812	0.252	0	HCC
Selenop	0	0.828923	0.981	0.746	0	HCC
Hal	0	0.826438	0.526	0.042	0	HCC
Tmem176b	0	0.825503	0.871	0.337	0	HCC
Atp5o.1	0	0.824568	0.751	0.197	0	HCC
Qprt	0	0.824216	0.586	0.061	0	HCC
Aadac	0	0.821789	0.621	0.082	0	HCC
Dap	0	0.818091	0.659	0.12	0	HCC
Rcl1	0	0.812719	0.587	0.068	0	HCC
Slc6a13	0	0.810594	0.563	0.054	0	HCC
Atox1	0	0.806753	0.875	0.331	0	HCC
Aldh2	0	0.805898	0.749	0.227	0	HCC
C3	0	0.802793	0.713	0.245	0	HCC
Prdx3	0	0.801072	0.614	0.098	0	HCC
Cxcl1	0	0.797698	0.494	0.077	0	HCC
Mif	0	0.795576	0.805	0.239	0	HCC
Fdft1	0	0.794922	0.676	0.124	0	HCC
Vkorc1	0	0.792911	0.712	0.155	0	HCC
Ang	0	0.791739	0.399	0.043	0	HCC
Cat	0	0.790477	0.725	0.174	0	HCC
Ugt2b5	0	0.790152	0.611	0.075	0	HCC
Grpel1	0	0.789838	0.622	0.112	0	HCC
Cyb5r3	0	0.787181	0.689	0.164	0	HCC
Afm	0	0.786143	0.616	0.067	0	HCC
1810008I18Rik	0	0.785633	0.573	0.051	0	HCC
Dbi	0	0.78553	0.995	0.787	0	HCC
Mug1	0	0.782589	0.685	0.186	0	HCC
Uba52	0	0.779897	0.955	0.628	0	HCC
Slc25a39	0	0.779427	0.769	0.24	0	HCC
Cyc1	0	0.778901	0.62	0.121	0	HCC
Tmem176a	0	0.776254	0.756	0.232	0	HCC
Eif5a	0	0.771237	0.768	0.26	0	HCC
Akr7a5	0	0.770393	0.603	0.089	0	HCC
Nit2	0	0.763695	0.575	0.07	0	HCC
Txn2	0	0.762972	0.648	0.122	0	HCC
Fxyd1	0	0.751379	0.613	0.089	0	HCC
Khk	0	0.750471	0.57	0.067	0	HCC
Hamp	0	0.748931	0.346	0.085	0	HCC
Fh1	0	0.748914	0.594	0.086	0	HCC
Glyat	0	0.747745	0.543	0.049	0	HCC
AI182371	0	0.747728	0.643	0.084	0	HCC
Errfi1	0	0.747161	0.721	0.178	0	HCC
Apob	0	0.744529	0.654	0.176	0	HCC
Aldh1l1	0	0.743809	0.574	0.062	0	HCC
Msmo1	0	0.742068	0.677	0.137	0	HCC
Pdia6	0	0.740115	0.775	0.286	0	HCC
Hebp1	0	0.73971	0.657	0.123	0	HCC
Tecr	0	0.737405	0.678	0.148	0	HCC
Ubb	0	0.736703	0.877	0.413	0	HCC
Hmgcs1	0	0.735592	0.695	0.197	0	HCC
Gstm2	0	0.734641	0.449	0.077	0	HCC
Spcs2	0	0.732856	0.76	0.26	0	HCC
Gstt3	0	0.730646	0.517	0.049	0	HCC
Cyp2a5	0	0.729709	0.317	0.026	0	HCC
Hpn	0	0.729589	0.608	0.102	0	HCC
Slc10a1	0	0.729429	0.455	0.016	0	HCC
Acaa2	0	0.728401	0.681	0.142	0	HCC
Hsd17b10	0	0.72786	0.652	0.134	0	HCC
Krtcap2	0	0.725062	0.818	0.296	0	HCC
Upb1	0	0.724384	0.586	0.062	0	HCC
Hagh	0	0.723653	0.577	0.079	0	HCC
Fads2	0	0.722746	0.476	0.044	0	HCC
Aes	0	0.722718	0.65	0.144	0	HCC
Cox7b	0	0.722409	0.753	0.191	0	HCC
Rdh11	0	0.719745	0.527	0.059	0	HCC
Erg28	0	0.71335	0.591	0.095	0	HCC
Lap3	0	0.712599	0.656	0.115	0	HCC
Iscu	0	0.707818	0.656	0.153	0	HCC
Dgat2	0	0.707731	0.557	0.06	0	HCC
Amdhd1	0	0.70739	0.583	0.063	0	HCC
Tmem14c	0	0.705032	0.64	0.135	0	HCC
Tuba1c	0	0.704813	0.661	0.153	0	HCC
Marc1	0	0.703666	0.529	0.039	0	HCC
Hao1	0	0.703325	0.54	0.034	0	HCC
Ppia	0	0.702513	0.957	0.6	0	HCC
Sar1b	0	0.700934	0.617	0.109	0	HCC
Cisd1	0	0.700564	0.686	0.142	0	HCC
Oaf	0	0.696035	0.562	0.085	0	HCC
Cth	0	0.696026	0.542	0.042	0	HCC
Mettl26	0	0.695856	0.62	0.114	0	HCC
Cdk2ap2	0	0.689568	0.653	0.131	0	HCC
Itih2	0	0.688952	0.695	0.183	0	HCC
Hist1h2bc	0	0.687489	0.683	0.158	0	HCC
Idi1	0	0.686061	0.664	0.14	0	HCC
Itih1	0	0.682668	0.54	0.046	0	HCC
F12	0	0.681787	0.582	0.073	0	HCC
Cope	0	0.680223	0.615	0.13	0	HCC
Slc25a1	0	0.679149	0.606	0.095	0	HCC
Ugt2b36	0	0.678758	0.604	0.079	0	HCC
Mrpl12	0	0.672358	0.604	0.099	0	HCC
Adk	0	0.67125	0.702	0.159	0	HCC
Gstm6	0	0.671072	0.505	0.047	0	HCC
Pmvk	0	0.669683	0.551	0.072	0	HCC
Mbl2	0	0.667091	0.323	0.037	0	HCC
Dad1	0	0.665243	0.775	0.265	0	HCC
Ostc	0	0.661221	0.716	0.19	0	HCC
Slc38a4	0	0.660675	0.56	0.066	0	HCC
Psen2	0	0.660014	0.668	0.15	0	HCC
Ifitm3	0	0.659959	0.933	0.514	0	HCC
Echdc3	0	0.659588	0.527	0.051	0	HCC
Tmem97	0	0.655809	0.602	0.091	0	HCC
Atf5	0	0.653508	0.51	0.053	0	HCC
Ccl9	0	0.653444	0.59	0.065	0	HCC
Slc27a5	0	0.652185	0.507	0.026	0	HCC
Rpl10-ps3	0	0.645982	0.678	0.18	0	HCC
Kyat1	0	0.645311	0.494	0.028	0	HCC
Serpina1c	0	0.64414	0.794	0.455	0	HCC
Slc25a5	0	0.64267	0.732	0.2	0	HCC
8430408G22Rik	0	0.642634	0.684	0.151	0	HCC
Mrap	0	0.641852	0.486	0.04	0	HCC
Ndufs3	0	0.640216	0.636	0.133	0	HCC
Hsd11b1	0	0.63965	0.618	0.091	0	HCC
Rpl9-ps6	0	0.637592	0.824	0.331	0	HCC
Ugt1a1	0	0.637019	0.453	0.02	0	HCC
Tff3	0	0.636632	0.718	0.18	0	HCC
Cyp2d9	0	0.631612	0.493	0.041	0	HCC
Gls2	0	0.627336	0.486	0.028	0	HCC
Cycs	0	0.62724	0.854	0.368	0	HCC
Mat1a	0	0.626123	0.457	0.049	0	HCC
Mrpl42	0	0.625912	0.588	0.113	0	HCC
Sord	0	0.62539	0.568	0.075	0	HCC
Gstm7	0	0.625238	0.525	0.053	0	HCC
Etfb	0	0.623423	0.732	0.231	0	HCC
Ebpl	0	0.622921	0.633	0.117	0	HCC
Tubb4b	0	0.622903	0.663	0.173	0	HCC
Lgals9	0	0.622466	0.746	0.231	0	HCC
Efna1	0	0.619586	0.583	0.115	0	HCC
Insig1	0	0.615661	0.626	0.118	0	HCC
Pglyrp2	0	0.615039	0.473	0.036	0	HCC
Eif3i	0	0.614411	0.61	0.128	0	HCC
Cib1	0	0.613781	0.622	0.126	0	HCC
Cbs	0	0.613742	0.544	0.067	0	HCC
Spcs1	0	0.612511	0.829	0.341	0	HCC
Prdx5	0	0.611553	0.791	0.274	0	HCC
Hint1	0	0.608	0.891	0.426	0	HCC
Eif4ebp1	0	0.607269	0.538	0.091	0	HCC
Got1	0	0.599944	0.618	0.115	0	HCC
Blvrb	0	0.598531	0.608	0.144	0	HCC
Mrpl17	0	0.597463	0.614	0.135	0	HCC
Cox5b	0	0.594354	0.855	0.352	0	HCC
Hspd1	0	0.593781	0.752	0.267	0	HCC
Mgst3	0	0.593227	0.562	0.103	0	HCC
Ndufa7	0	0.591801	0.829	0.309	0	HCC
Ndufv2	0	0.59128	0.6	0.123	0	HCC
Asgr2	0	0.590518	0.485	0.033	0	HCC
Cyp51	0	0.589184	0.615	0.119	0	HCC
Ndufb9	0	0.588487	0.835	0.309	0	HCC
Gjb2	0	0.586303	0.476	0.035	0	HCC
Sqor	0	0.585767	0.627	0.112	0	HCC
Ndrg2	0	0.583689	0.569	0.084	0	HCC
Perp	0	0.583351	0.534	0.069	0	HCC
Psmb3	0	0.580288	0.672	0.181	0	HCC
Nr0b2	0	0.578709	0.449	0.046	0	HCC
Rer1	0	0.578476	0.633	0.151	0	HCC
Prdx4	0	0.578112	0.632	0.145	0	HCC
Pon1	0	0.577076	0.338	0.023	0	HCC
Nipsnap1	0	0.576722	0.564	0.085	0	HCC
Prelid1	0	0.576013	0.676	0.202	0	HCC
Bola3	0	0.575326	0.675	0.154	0	HCC
Aldh8a1	0	0.572219	0.508	0.038	0	HCC
Ccs	0	0.570753	0.525	0.077	0	HCC
Atp5b	0	0.570554	0.709	0.215	0	HCC
Sec61b	0	0.570302	0.903	0.441	0	HCC
Cops6	0	0.565802	0.581	0.115	0	HCC
Slc35b1	0	0.565767	0.525	0.086	0	HCC
2410015M20Rik	0	0.56423	0.628	0.139	0	HCC
Rhod	0	0.563526	0.541	0.09	0	HCC
Tcea3	0	0.560681	0.594	0.098	0	HCC
Pla2g12b	0	0.559168	0.49	0.042	0	HCC
Manf	0	0.556262	0.74	0.244	0	HCC
Gpx1	0	0.555186	0.953	0.597	0	HCC
Foxa3	0	0.554592	0.48	0.054	0	HCC
Mrps24	0	0.552596	0.623	0.139	0	HCC
Cldn3	0	0.552359	0.589	0.107	0	HCC
Rpl32	0	0.550718	0.888	0.445	0	HCC
Rnf181	0	0.550498	0.579	0.115	0	HCC
Mrpl30	0	0.547664	0.567	0.11	0	HCC
Uqcr10	0	0.547604	0.78	0.248	0	HCC
Bdh1	0	0.546136	0.497	0.051	0	HCC
Psmb1	0	0.544844	0.702	0.207	0	HCC
Suclg1	0	0.544296	0.575	0.103	0	HCC
Coa3	0	0.543014	0.649	0.161	0	HCC
Ndufa11	0	0.542789	0.751	0.237	0	HCC
Rpl15	0	0.542409	0.825	0.337	0	HCC
Ndufab1	0	0.541879	0.782	0.27	0	HCC
Ndufa6	0	0.541146	0.868	0.356	0	HCC
Glo1	0	0.540403	0.626	0.133	0	HCC
Aspdh	0	0.540234	0.448	0.023	0	HCC
1110008F13Rik	0	0.538435	0.613	0.139	0	HCC
Ftcd	0	0.535995	0.494	0.045	0	HCC
Mug2	0	0.535508	0.488	0.071	0	HCC
Etnk2	0	0.532603	0.463	0.026	0	HCC
Hadh	0	0.532133	0.573	0.106	0	HCC
Rtraf	0	0.531635	0.648	0.17	0	HCC
Pcyt2	0	0.531341	0.565	0.088	0	HCC
Gfer	0	0.53012	0.492	0.064	0	HCC
Smlr1	0	0.52907	0.499	0.051	0	HCC
Prodh2	0	0.528676	0.467	0.025	0	HCC
Ces2c	0	0.528662	0.409	0.017	0	HCC
Cpn1	0	0.528031	0.512	0.065	0	HCC
Ociad2	0	0.527409	0.481	0.044	0	HCC
Iah1	0	0.526912	0.583	0.113	0	HCC
Abhd5	0	0.526695	0.488	0.062	0	HCC
Gcsh	0	0.526676	0.539	0.077	0	HCC
Fbxo6	0	0.526209	0.464	0.061	0	HCC
Pgk1	0	0.52297	0.664	0.189	0	HCC
Tmem150a	0	0.52286	0.502	0.069	0	HCC
Tspan31	0	0.520412	0.6	0.117	0	HCC
Timm8b	0	0.520128	0.589	0.118	0	HCC
Ndufa13	0	0.519698	0.848	0.374	0	HCC
Hgd	0	0.519485	0.546	0.06	0	HCC
Atp5j	0	0.517132	0.861	0.383	0	HCC
Tmbim6	0	0.51659	0.885	0.546	0	HCC
Cmbl	0	0.516145	0.489	0.061	0	HCC
Serpina10	0	0.514244	0.508	0.059	0	HCC
Rgn	0	0.512815	0.253	0.032	0	HCC
D8Ertd738e	0	0.510867	0.674	0.191	0	HCC
Acat1	0	0.51044	0.654	0.163	0	HCC
Tm6sf2	0	0.510257	0.444	0.03	0	HCC
Adtrp	0	0.51013	0.43	0.026	0	HCC
Atp5f1	0	0.508413	0.783	0.295	0	HCC
Psmb6	0	0.507326	0.649	0.169	0	HCC
Gnpnat1	0	0.507011	0.565	0.102	0	HCC
Rogdi	0	0.505707	0.515	0.066	0	HCC
Msra	0	0.50492	0.507	0.058	0	HCC
Acp1	0	0.504399	0.553	0.105	0	HCC
Spr	0	0.504297	0.565	0.103	0	HCC
Igf1	0	0.503666	0.54	0.136	0	HCC
Uqcrc1	0	0.503562	0.579	0.129	0	HCC
Swi5	0	0.502531	0.769	0.287	0	HCC
Mettl7a1	0	0.501367	0.51	0.066	0	HCC
Tnfrsf12a	0	0.500473	0.511	0.088	0	HCC
Pter	0	0.499441	0.524	0.078	0	HCC
Gpt	0	0.499	0.488	0.049	0	HCC
Rpl36al	0	0.498733	0.904	0.48	0	HCC
Rps5	0	0.498685	0.867	0.408	0	HCC
Gstm4	0	0.498527	0.399	0.034	0	HCC
Hc	0	0.498164	0.502	0.071	0	HCC
Nsdhl	0	0.497358	0.524	0.075	0	HCC
1110008P14Rik	0	0.496765	0.555	0.107	0	HCC
Tspan8	0	0.496173	0.606	0.175	0	HCC
Apon	0	0.495788	0.485	0.038	0	HCC
Car8	0	0.495465	0.563	0.112	0	HCC
Cox7a2	0	0.49532	0.842	0.348	0	HCC
Gss	0	0.49418	0.506	0.079	0	HCC
Bnip3	0	0.49394	0.56	0.096	0	HCC
Got2	0	0.493724	0.59	0.117	0	HCC
Insig2	0	0.493498	0.557	0.1	0	HCC
Uroc1	0	0.491856	0.444	0.027	0	HCC
Tm7sf2	0	0.490345	0.447	0.045	0	HCC
Hsd3b7	0	0.488633	0.389	0.03	0	HCC
Apoa5	0	0.488391	0.39	0.032	0	HCC
Acadl	0	0.48683	0.606	0.141	0	HCC
Rps4x	0	0.486003	0.891	0.484	0	HCC
Akr1c20	0	0.485855	0.518	0.071	0	HCC
Tmem126a	0	0.485595	0.466	0.061	0	HCC
Pah	0	0.485207	0.486	0.078	0	HCC
Proz	0	0.482383	0.461	0.029	0	HCC
Pygl	0	0.482248	0.537	0.069	0	HCC
Ube2v1	0	0.480369	0.482	0.077	0	HCC
Park7	0	0.479715	0.685	0.204	0	HCC
Asl	0	0.479098	0.519	0.075	0	HCC
Sult1d1	0	0.474913	0.463	0.041	0	HCC
Alad	0	0.473951	0.52	0.088	0	HCC
Psmb5	0	0.473641	0.709	0.228	0	HCC
Gulo	0	0.472771	0.377	0.037	0	HCC
Bhmt2	0	0.472656	0.478	0.038	0	HCC
Ndufb11	0	0.47186	0.826	0.335	0	HCC
Cd81	0	0.471415	0.781	0.349	0	HCC
Rpl36	0	0.470826	0.886	0.438	0	HCC
Sod2	0	0.470722	0.56	0.113	0	HCC
Fabp2	0	0.470633	0.375	0.031	0	HCC
Sec13	0	0.468863	0.517	0.094	0	HCC
Ssr2	0	0.468547	0.592	0.145	0	HCC
Mtch2	0	0.467945	0.589	0.131	0	HCC
Cxcl13	0	0.466864	0.315	0.056	0	HCC
Timm17b	0	0.466106	0.513	0.087	0	HCC
Ndufs8	0	0.466092	0.511	0.088	0	HCC
Rpl24	0	0.465635	0.919	0.553	0	HCC
Txnl1	0	0.462795	0.62	0.161	0	HCC
Rab4a	0	0.4606	0.503	0.063	0	HCC
Mrpl14	0	0.459414	0.596	0.14	0	HCC
Mt2	0	0.458115	0.581	0.194	0	HCC
Ces2a	0	0.456482	0.4	0.017	0	HCC
Hoga1	0	0.4563	0.446	0.038	0	HCC
Naxe	0	0.456078	0.545	0.111	0	HCC
Prdx2	0	0.456001	0.684	0.2	0	HCC
Gabarap	0	0.45503	0.761	0.3	0	HCC
Gng5	0	0.45454	0.877	0.423	0	HCC
Elob	0	0.454511	0.835	0.369	0	HCC
Krt8	0	0.454308	0.723	0.212	0	HCC
Selenok	0	0.454101	0.786	0.326	0	HCC
Kmo	0	0.453981	0.463	0.035	0	HCC
Bphl	0	0.45345	0.448	0.059	0	HCC
Ndufb6	0	0.452963	0.73	0.234	0	HCC
Creg1	0	0.451826	0.75	0.263	0	HCC
Sdhd	0	0.451522	0.621	0.146	0	HCC
Sec61g	0	0.451489	0.913	0.499	0	HCC
Erich4	0	0.451355	0.462	0.041	0	HCC
Psmd8	0	0.450789	0.615	0.155	0	HCC
G6pc	0	0.450401	0.377	0.053	0	HCC
Pgam1	0	0.450131	0.597	0.144	0	HCC
Mdh2	0	0.449544	0.603	0.152	0	HCC
Hspe1	0	0.449339	0.917	0.487	0	HCC
Rarres1	0	0.448534	0.442	0.029	0	HCC
Dnajc3	0	0.448057	0.725	0.295	0	HCC
Vamp8	0	0.448047	0.725	0.232	0	HCC
Psma3	0	0.447891	0.707	0.238	0	HCC
Gadd45gip1	0	0.447687	0.544	0.108	0	HCC
Cox8a	0	0.447529	0.925	0.539	0	HCC
Otc	0	0.447016	0.443	0.043	0	HCC
Mst1	0	0.446474	0.443	0.039	0	HCC
Aup1	0	0.442852	0.547	0.111	0	HCC
Cystm1	0	0.441342	0.514	0.103	0	HCC
Oaz1	0	0.441165	0.859	0.423	0	HCC
Eif3h	0	0.441096	0.567	0.129	0	HCC
Ufc1	0	0.440928	0.569	0.123	0	HCC
Fkbp2	0	0.439152	0.676	0.205	0	HCC
Cd9	0	0.437837	0.675	0.219	0	HCC
Atp5g2	0	0.437584	0.79	0.345	0	HCC
Amacr	0	0.437279	0.468	0.045	0	HCC
Acox1	0	0.435843	0.556	0.105	0	HCC
Mea1	0	0.435353	0.466	0.075	0	HCC
H2-T22	0	0.435229	0.543	0.11	0	HCC
Mrpl20	0	0.435229	0.599	0.151	0	HCC
Pipox	0	0.435025	0.47	0.063	0	HCC
Fmo5	0	0.432894	0.514	0.071	0	HCC
Ndufa4	0	0.430565	0.971	0.673	0	HCC
Cyp2b9	0	0.430451	0.397	0.017	0	HCC
Cela1	0	0.430334	0.523	0.09	0	HCC
Crp	0	0.429334	0.469	0.066	0	HCC
Elovl2	0	0.428973	0.399	0.036	0	HCC
Mad2l2	0	0.428632	0.443	0.059	0	HCC
Ech1	0	0.427823	0.474	0.088	0	HCC
Serp1	0	0.42756	0.792	0.306	0	HCC
Dhrs4	0	0.427421	0.487	0.075	0	HCC
Mvk	0	0.426464	0.412	0.04	0	HCC
Cd1d1	0	0.425752	0.491	0.071	0	HCC
Slc48a1	0	0.425577	0.512	0.107	0	HCC
Acy3	0	0.425363	0.42	0.041	0	HCC
Gdf15	0	0.425121	0.44	0.099	0	HCC
Rdh5	0	0.424556	0.409	0.03	0	HCC
Lcat	0	0.424258	0.411	0.025	0	HCC
C8a	0	0.424025	0.428	0.034	0	HCC
Slc37a4	0	0.423264	0.437	0.045	0	HCC
Mrpl54	0	0.422279	0.495	0.099	0	HCC
Hmgcs2	0	0.421812	0.61	0.147	0	HCC
Ttpa	0	0.42152	0.508	0.07	0	HCC
Mrps34	0	0.420748	0.493	0.085	0	HCC
Tmed2	0	0.420581	0.695	0.241	0	HCC
Slc25a17	0	0.42054	0.507	0.094	0	HCC
Smim14	0	0.420244	0.558	0.122	0	HCC
Aldh7a1	0	0.419409	0.517	0.084	0	HCC
Eif6	0	0.419103	0.536	0.113	0	HCC
Fdx1	0	0.419012	0.65	0.168	0	HCC
Abhd14b	0	0.418575	0.479	0.064	0	HCC
Gm35696	0	0.418499	0.336	0.032	0	HCC
Bccip	0	0.417528	0.534	0.104	0	HCC
Idh1	0	0.417437	0.63	0.151	0	HCC
Cox6b1	0	0.415161	0.873	0.417	0	HCC
Gcdh	0	0.41491	0.471	0.054	0	HCC
Stoml2	0	0.414581	0.472	0.078	0	HCC
Abcc2	0	0.414476	0.436	0.073	0	HCC
Ndufb5	0	0.412994	0.697	0.209	0	HCC
Uqcrb	0	0.411345	0.913	0.509	0	HCC
Cox5a	0	0.411179	0.867	0.441	0	HCC
Ift20	0	0.410613	0.576	0.142	0	HCC
Ly6e	0	0.410467	0.808	0.385	0	HCC
Sqle	0	0.410212	0.466	0.064	0	HCC
Vnn3	0	0.409966	0.395	0.033	0	HCC
Tpmt	0	0.409858	0.459	0.063	0	HCC
F11	0	0.409495	0.408	0.024	0	HCC
Bloc1s1	0	0.408185	0.721	0.237	0	HCC
Timm8a1	0	0.408158	0.466	0.062	0	HCC
Gcgr	0	0.408023	0.429	0.04	0	HCC
Rps2	0	0.407994	0.922	0.578	0	HCC
Acaa1b	0	0.405343	0.367	0.037	0	HCC
Naca	0	0.405341	0.781	0.326	0	HCC
Slc22a18	0	0.405275	0.44	0.051	0	HCC
Eci1	0	0.404463	0.437	0.065	0	HCC
Ugp2	0	0.403657	0.733	0.263	0	HCC
Pmpcb	0	0.403496	0.48	0.075	0	HCC
F5	0	0.402111	0.448	0.05	0	HCC
Yif1a	0	0.401813	0.427	0.053	0	HCC
Derl1	0	0.401745	0.581	0.141	0	HCC
Ephx2	0	0.400716	0.433	0.05	0	HCC
Tufm	0	0.400451	0.484	0.08	0	HCC
Eef1d	0	0.396427	0.629	0.18	0	HCC
2310039H08Rik	0	0.395979	0.523	0.1	0	HCC
Itih5	0	0.395553	0.489	0.085	0	HCC
Tkfc	0	0.392862	0.429	0.045	0	HCC
Fam162a	0	0.392151	0.618	0.164	0	HCC
Timm13	0	0.391978	0.748	0.274	0	HCC
Pgm2	0	0.391866	0.488	0.071	0	HCC
Hspb8	0	0.391767	0.403	0.045	0	HCC
Rgs16	0	0.391756	0.327	0.035	0	HCC
Nipsnap3b	0	0.391686	0.471	0.076	0	HCC
Mrps18b	0	0.391356	0.423	0.06	0	HCC
Saa4	0	0.391297	0.416	0.037	0	HCC
Hsd3b3	0	0.390596	0.358	0.014	0	HCC
Serpina11	0	0.390454	0.377	0.023	0	HCC
Cnpy2	0	0.39031	0.551	0.126	0	HCC
Mlf2	0	0.390206	0.582	0.151	0	HCC
Ndufb2	0	0.38911	0.66	0.188	0	HCC
Rpl19	0	0.388612	0.897	0.526	0	HCC
Gm4788	0	0.388434	0.449	0.047	0	HCC
Ppdpf	0	0.387886	0.543	0.121	0	HCC
Surf4	0	0.387777	0.628	0.172	0	HCC
Dhfr	0	0.387771	0.396	0.044	0	HCC
Cyp2c40	0	0.38724	0.264	0.015	0	HCC
Ctsl	0	0.387133	0.811	0.411	0	HCC
Echdc2	0	0.386971	0.479	0.079	0	HCC
Acadvl	0	0.385069	0.521	0.091	0	HCC
Emc6	0	0.383714	0.564	0.122	0	HCC
Rps7	0	0.383579	0.913	0.538	0	HCC
Ddah1	0	0.383378	0.537	0.104	0	HCC
Acss2	0	0.383366	0.395	0.039	0	HCC
Timm23	0	0.383213	0.523	0.109	0	HCC
Enpp2	0	0.382937	0.419	0.046	0	HCC
Sra1	0	0.381806	0.524	0.111	0	HCC
Tnfsf13	0	0.381504	0.374	0.031	0	HCC
Mrpl15	0	0.381026	0.51	0.1	0	HCC
Elovl5	0	0.380854	0.521	0.091	0	HCC
Lsr	0	0.380433	0.52	0.11	0	HCC
Gclm	0	0.379504	0.61	0.158	0	HCC
Mrps16	0	0.378453	0.509	0.104	0	HCC
Akr1c13	0	0.378433	0.472	0.073	0	HCC
Dcxr	0	0.376674	0.422	0.055	0	HCC
Acads	0	0.376611	0.49	0.088	0	HCC
Arpc5l	0	0.372994	0.5	0.099	0	HCC
Slc31a1	0	0.371287	0.487	0.074	0	HCC
Dhcr7	0	0.370243	0.427	0.055	0	HCC
Rps18	0	0.370194	0.773	0.309	0	HCC
Sec14l2	0	0.370146	0.373	0.022	0	HCC
Tmem258	0	0.369678	0.738	0.278	0	HCC
Dhrs1	0	0.368974	0.476	0.081	0	HCC
Nme6	0	0.368891	0.345	0.026	0	HCC
Phb2	0	0.366969	0.558	0.133	0	HCC
Csnk2b	0	0.366827	0.591	0.157	0	HCC
Cldn1	0	0.366306	0.402	0.035	0	HCC
Fam210b	0	0.36558	0.463	0.074	0	HCC
Higd1a	0	0.363987	0.657	0.183	0	HCC
Rplp0	0	0.363321	0.853	0.458	0	HCC
Sdf2l1	0	0.363194	0.407	0.063	0	HCC
Scarb1	0	0.362777	0.609	0.168	0	HCC
Cers2	0	0.362507	0.615	0.164	0	HCC
Hsd17b12	0	0.362019	0.538	0.112	0	HCC
Ndufs7	0	0.361838	0.607	0.171	0	HCC
C8b	0	0.360564	0.361	0.016	0	HCC
Mrpl35	0	0.360464	0.477	0.091	0	HCC
Ugt2b34	0	0.360097	0.429	0.059	0	HCC
Ndufb10	0	0.358909	0.732	0.255	0	HCC
Mthfs	0	0.357817	0.465	0.08	0	HCC
Aldh1b1	0	0.357585	0.345	0.043	0	HCC
Mydgf	0	0.356297	0.578	0.136	0	HCC
Nit1	0	0.355997	0.464	0.068	0	HCC
Cp	0	0.354971	0.691	0.294	0	HCC
Msrb1	0	0.354681	0.602	0.15	0	HCC
Sdc4	0	0.354	0.634	0.2	0	HCC
Herpud1	0	0.353968	0.617	0.192	0	HCC
Acox2	0	0.353554	0.419	0.043	0	HCC
Rbp1	0	0.352315	0.809	0.317	0	HCC
Guk1	0	0.351547	0.507	0.11	0	HCC
Sds	0	0.350541	0.265	0.038	0	HCC
Srm	0	0.350529	0.41	0.069	0	HCC
Ndufa10	0	0.350401	0.559	0.126	0	HCC
Rasgrp2	0	0.35032	0.725	0.237	0	HCC
Vps28	0	0.350302	0.543	0.131	0	HCC
Nat8f1	0	0.349875	0.372	0.032	0	HCC
Hint3	0	0.34778	0.403	0.059	0	HCC
C1rl	0	0.347374	0.376	0.024	0	HCC
Aldh9a1	0	0.346374	0.473	0.077	0	HCC
Mrps7	0	0.345155	0.466	0.08	0	HCC
Cyp2c29	0	0.344959	0.262	0.023	0	HCC
F13b	0	0.344641	0.416	0.038	0	HCC
Glrx5	0	0.344354	0.608	0.159	0	HCC
Marc2	0	0.344315	0.658	0.198	0	HCC
Mbl1	0	0.344033	0.343	0.022	0	HCC
Ost4	0	0.344022	0.822	0.386	0	HCC
Tmem147	0	0.343886	0.511	0.115	0	HCC
Cyp4v3	0	0.343337	0.464	0.073	0	HCC
Gpc3	0	0.342942	0.371	0.05	0	HCC
Cutal	0	0.342676	0.352	0.03	0	HCC
Zap70	0	0.341483	0.313	0.023	0	HCC
Endog	0	0.3406	0.384	0.039	0	HCC
Gckr	0	0.340516	0.368	0.03	0	HCC
Gm27216	0	0.339959	0.337	0.019	0	HCC
March5	0	0.338621	0.51	0.111	0	HCC
Slc22a1	0	0.338602	0.349	0.026	0	HCC
Creb3l3	0	0.335627	0.391	0.044	0	HCC
Dctpp1	0	0.335546	0.428	0.076	0	HCC
Agxt2	0	0.33458	0.369	0.024	0	HCC
Tmem120a	0	0.334527	0.45	0.076	0	HCC
Shmt1	0	0.333874	0.402	0.046	0	HCC
Ropn1l	0	0.333405	0.368	0.038	0	HCC
Dnajc19	0	0.333318	0.709	0.234	0	HCC
Cyp2j5	0	0.333117	0.286	0.033	0	HCC
Aurkaip1	0	0.332604	0.554	0.14	0	HCC
Slc39a4	0	0.33127	0.442	0.086	0	HCC
Uqcrq	0	0.330409	0.959	0.63	0	HCC
Echdc1	0	0.330313	0.405	0.048	0	HCC
Ndufv1	0	0.329924	0.476	0.089	0	HCC
Fam136a	0	0.329114	0.404	0.062	0	HCC
Psma4	0	0.329055	0.569	0.149	0	HCC
Ran	0	0.328875	0.705	0.266	0	HCC
Tmem167	0	0.328569	0.676	0.212	0	HCC
Cpe	0	0.32841	0.5	0.113	0	HCC
Ctsz	0	0.327945	0.639	0.201	0	HCC
Mrpl22	0	0.327851	0.429	0.074	0	HCC
Atp5j2	0	0.327432	0.886	0.455	0	HCC
Gm11789	0	0.326721	0.318	0.023	0	HCC
Ybx1	0	0.326302	0.754	0.318	0	HCC
Bola1	0	0.326059	0.467	0.091	0	HCC
Adi1	0	0.325865	0.463	0.074	0	HCC
Tfr2	0	0.32581	0.373	0.038	0	HCC
Col18a1	0	0.325763	0.388	0.057	0	HCC
Clpp	0	0.325689	0.454	0.084	0	HCC
Slpi	0	0.325633	0.583	0.146	0	HCC
Htatip2	0	0.325431	0.419	0.069	0	HCC
Mocs2	0	0.325161	0.624	0.173	0	HCC
H2-Ke6	0	0.324222	0.46	0.081	0	HCC
Acot13	0	0.323882	0.413	0.072	0	HCC
Lss	0	0.322988	0.353	0.033	0	HCC
Cnbp	0	0.322614	0.676	0.241	0	HCC
0610009B22Rik	0	0.322202	0.414	0.067	0	HCC
Mrps18a	0	0.320232	0.426	0.082	0	HCC
Rnh1	0	0.319969	0.448	0.087	0	HCC
Amy1	0	0.319964	0.359	0.027	0	HCC
Urad	0	0.319418	0.298	0.011	0	HCC
Vmp1	0	0.318796	0.522	0.121	0	HCC
Rpl28	0	0.318543	0.885	0.494	0	HCC
Rpl10a	0	0.318247	0.796	0.374	0	HCC
Lonp2	0	0.317788	0.481	0.092	0	HCC
Lactb2	0	0.317588	0.504	0.09	0	HCC
Rpl7a	0	0.317493	0.862	0.45	0	HCC
Mrpl43	0	0.317183	0.459	0.088	0	HCC
Mrpl50	0	0.317058	0.473	0.089	0	HCC
Tmem59	0	0.316689	0.62	0.184	0	HCC
Emc4	0	0.316547	0.419	0.072	0	HCC
Phb	0	0.316469	0.51	0.111	0	HCC
Nudt7	0	0.315589	0.377	0.043	0	HCC
Sdc2	0	0.315316	0.45	0.072	0	HCC
Rps11	0	0.315118	0.861	0.457	0	HCC
Tmbim4	0	0.313876	0.59	0.172	0	HCC
Tmem38b	0	0.313593	0.463	0.077	0	HCC
Derl2	0	0.31354	0.493	0.087	0	HCC
Isca2	0	0.312236	0.466	0.092	0	HCC
Psph	0	0.312013	0.394	0.047	0	HCC
Vps29	0	0.311835	0.51	0.122	0	HCC
Mvb12a	0	0.310628	0.507	0.115	0	HCC
Uqcrc2	0	0.310593	0.521	0.115	0	HCC
Decr2	0	0.309795	0.378	0.043	0	HCC
Pyurf	0	0.309768	0.404	0.069	0	HCC
Psmb2	0	0.309513	0.572	0.16	0	HCC
Ndufv3	0	0.309393	0.748	0.276	0	HCC
F7	0	0.30935	0.367	0.03	0	HCC
Ugt2a3	0	0.309192	0.331	0.018	0	HCC
Pigr	0	0.30871	0.285	0.058	0	HCC
Hnf4a	0	0.308635	0.358	0.045	0	HCC
Med29	0	0.308311	0.365	0.054	0	HCC
Mrpl28	0	0.308239	0.507	0.108	0	HCC
Nudt4	0	0.308218	0.569	0.142	0	HCC
Acat2	0	0.307419	0.357	0.04	0	HCC
Fst	0	0.306526	0.359	0.048	0	HCC
BC025446	0	0.306381	0.344	0.031	0	HCC
Mrpl58	0	0.305845	0.471	0.1	0	HCC
Trappc1	0	0.304659	0.434	0.08	0	HCC
1110065P20Rik	0	0.304286	0.379	0.056	0	HCC
Commd3	0	0.303321	0.558	0.149	0	HCC
Decr1	0	0.303239	0.395	0.064	0	HCC
Tlcd2	0	0.302797	0.368	0.044	0	HCC
Mrps17	0	0.302749	0.473	0.094	0	HCC
Pecr	0	0.302593	0.361	0.036	0	HCC
Acat3	0	0.302453	0.354	0.032	0	HCC
Prlr	0	0.30241	0.295	0.017	0	HCC
Tubb6	0	0.301727	0.346	0.043	0	HCC
Cltb	0	0.301369	0.49	0.105	0	HCC
Ndufs5	0	0.301301	0.64	0.196	0	HCC
Mrpl34	0	0.30094	0.526	0.125	0	HCC
Lamtor1	0	0.300869	0.48	0.103	0	HCC
Ggct	0	0.300117	0.421	0.069	0	HCC
Mtx2	0	0.300005	0.445	0.082	0	HCC
Idh3b	0	0.299481	0.496	0.108	0	HCC
Hmgn1	0	0.299438	0.659	0.201	0	HCC
Acnat2	0	0.299347	0.314	0.019	0	HCC
Immp2l	0	0.299046	0.329	0.035	0	HCC
Iyd	0	0.298544	0.37	0.037	0	HCC
Nat8f2	0	0.298536	0.314	0.02	0	HCC
Hint2	0	0.298095	0.561	0.137	0	HCC
Sardh	0	0.297383	0.345	0.026	0	HCC
Lbp	0	0.29719	0.392	0.061	0	HCC
Bag1	0	0.297044	0.576	0.158	0	HCC
Cyp3a25	0	0.296771	0.274	0.014	0	HCC
Pgls	0	0.295862	0.606	0.181	0	HCC
Arl1	0	0.295351	0.53	0.126	0	HCC
Ndufb8	0	0.294911	0.746	0.294	0	HCC
Nudt2	0	0.29434	0.349	0.052	0	HCC
Gpd1	0	0.293804	0.345	0.031	0	HCC
Chchd3	0	0.293733	0.477	0.095	0	HCC
Cldn14	0	0.293518	0.322	0.019	0	HCC
Cox19	0	0.293409	0.402	0.074	0	HCC
Maob	0	0.293405	0.369	0.037	0	HCC
Pnkd	0	0.293398	0.47	0.1	0	HCC
Ap3s1	0	0.293098	0.455	0.09	0	HCC
Ak2	0	0.292423	0.552	0.138	0	HCC
Tomm22	0	0.29119	0.532	0.131	0	HCC
Rpl26	0	0.290627	0.818	0.391	0	HCC
Agmat	0	0.289526	0.315	0.022	0	HCC
Mrps10	0	0.289023	0.434	0.08	0	HCC
Gch1	0	0.288982	0.406	0.058	0	HCC
Ghitm	0	0.288032	0.63	0.199	0	HCC
Smdt1	0	0.287969	0.764	0.323	0	HCC
Nags	0	0.287735	0.335	0.022	0	HCC
Pgp	0	0.287641	0.417	0.071	0	HCC
Stk16	0	0.287619	0.417	0.07	0	HCC
Tmem86b	0	0.287361	0.324	0.021	0	HCC
Tspo	0	0.287247	0.62	0.201	0	HCC
Dpys	0	0.286878	0.298	0.017	0	HCC
Pop5	0	0.286126	0.392	0.067	0	HCC
Fads1	0	0.286121	0.46	0.081	0	HCC
Pam16	0	0.285632	0.52	0.121	0	HCC
Gltpd2	0	0.285226	0.345	0.029	0	HCC
Arf4	0	0.285178	0.673	0.25	0	HCC
Tm2d3	0	0.285107	0.432	0.084	0	HCC
Pcsk9	0	0.284887	0.343	0.038	0	HCC
Galt	0	0.284728	0.377	0.049	0	HCC
Mrpl18	0	0.284716	0.48	0.109	0	HCC
F9	0	0.284565	0.359	0.035	0	HCC
Klk1b4	0	0.284554	0.267	0.01	0	HCC
Skp1a	0	0.282535	0.661	0.218	0	HCC
Fam213a	0	0.282107	0.487	0.105	0	HCC
Pnpo	0	0.281874	0.418	0.058	0	HCC
Tmprss6	0	0.280693	0.344	0.037	0	HCC
Cfh	0	0.280619	0.616	0.185	0	HCC
Akr1d1	0	0.280511	0.269	0.011	0	HCC
Elof1	0	0.280198	0.383	0.068	0	HCC
Lman1	0	0.28017	0.574	0.165	0	HCC
Kif21a	0	0.279813	0.391	0.066	0	HCC
Aig1	0	0.278946	0.417	0.084	0	HCC
Nnmt	0	0.278853	0.296	0.033	0	HCC
Mrpl27	0	0.278738	0.43	0.073	0	HCC
Ak3	0	0.277734	0.455	0.089	0	HCC
Gale	0	0.276927	0.333	0.025	0	HCC
Gpld1	0	0.276369	0.298	0.021	0	HCC
Mvd	0	0.276277	0.36	0.039	0	HCC
Akr1c12	0	0.275368	0.331	0.034	0	HCC
Tmem208	0	0.275234	0.507	0.119	0	HCC
Pqlc2	0	0.275116	0.349	0.031	0	HCC
Ssu72	0	0.274955	0.506	0.123	0	HCC
Slc25a13	0	0.274829	0.366	0.044	0	HCC
Erp44	0	0.274581	0.562	0.146	0	HCC
Psma2	0	0.27452	0.609	0.184	0	HCC
Tmem53	0	0.274483	0.326	0.034	0	HCC
Zbtb8os	0	0.274167	0.445	0.079	0	HCC
Scn8a	0	0.274061	0.311	0.03	0	HCC
Eno1	0	0.273516	0.63	0.203	0	HCC
Dph3	0	0.272796	0.425	0.092	0	HCC
Mrpl55	0	0.27276	0.417	0.081	0	HCC
Rpl8	0	0.272301	0.817	0.423	0	HCC
Mthfsl	0	0.272283	0.432	0.086	0	HCC
Cyp4f14	0	0.271924	0.282	0.029	0	HCC
Pcbp1	0	0.271886	0.665	0.249	0	HCC
Rpl14	0	0.271835	0.803	0.383	0	HCC
Leap2	0	0.271414	0.303	0.042	0	HCC
Egfr	0	0.270677	0.344	0.048	0	HCC
Ccdc124	0	0.270352	0.453	0.089	0	HCC
Arf1	0	0.269577	0.668	0.25	0	HCC
Ubl4a	0	0.26911	0.391	0.067	0	HCC
Mcfd2	0	0.26877	0.631	0.199	0	HCC
Vapa	0	0.26838	0.645	0.218	0	HCC
0610005C13Rik	0	0.268231	0.331	0.028	0	HCC
Slc16a7	0	0.268004	0.348	0.034	0	HCC
Nedd8	0	0.267417	0.631	0.213	0	HCC
Kdelr1	0	0.26731	0.597	0.179	0	HCC
Eif4e2	0	0.267216	0.433	0.083	0	HCC
Polr1d	0	0.267164	0.579	0.17	0	HCC
Slc25a25	0	0.265928	0.367	0.053	0	HCC
Coq8b	0	0.265677	0.406	0.06	0	HCC
Mrps12	0	0.26559	0.514	0.122	0	HCC
Ppa2	0	0.264604	0.452	0.093	0	HCC
Shmt2	0	0.263976	0.393	0.05	0	HCC
Itm2b	0	0.263808	0.851	0.504	0	HCC
Pdzd11	0	0.262665	0.383	0.071	0	HCC
Coq7	0	0.26248	0.406	0.07	0	HCC
Psmc2	0	0.262273	0.426	0.083	0	HCC
Cpn2	0	0.262197	0.272	0.018	0	HCC
Smim20	0	0.261542	0.397	0.072	0	HCC
Mrps15	0	0.258873	0.5	0.117	0	HCC
Timd2	0	0.258287	0.288	0.016	0	HCC
Gstp3	0	0.25778	0.286	0.03	0	HCC
Hibadh	0	0.256819	0.542	0.128	0	HCC
Pex11g	0	0.256478	0.341	0.03	0	HCC
Kif5c	0	0.256474	0.298	0.029	0	HCC
Pxmp4	0	0.256148	0.34	0.042	0	HCC
Fasn	0	0.255942	0.306	0.034	0	HCC
Tfg	0	0.255935	0.435	0.089	0	HCC
Baat	0	0.255439	0.302	0.024	0	HCC
Pex16	0	0.255362	0.385	0.05	0	HCC
Psma6	0	0.254939	0.549	0.15	0	HCC
Ddrgk1	0	0.253779	0.592	0.174	0	HCC
Snrpd2	0	0.253694	0.453	0.114	0	HCC
Ccdc107	0	0.253344	0.453	0.096	0	HCC
Ergic3	0	0.253338	0.485	0.112	0	HCC
Ndufb4	0	0.252971	0.733	0.285	0	HCC
Acadm	0	0.252735	0.588	0.161	0	HCC
Habp2	0	0.252509	0.365	0.058	0	HCC
Ppcs	0	0.252376	0.332	0.042	0	HCC
Slc25a15	0	0.25182	0.288	0.041	0	HCC
Pla1a	0	0.250311	0.362	0.053	0	HCC
Mcee	0	0.250123	0.442	0.093	0	HCC
Rpl11	6.66319e-291	0.29141	0.929	0.615	2.06912e-286	HCC
Rpl13	9.25754e-252	0.261486	0.926	0.634	2.87474e-247	HCC
Atp5e	5.91672e-250	0.298742	0.931	0.57	1.83732e-245	HCC
Rps26	4.65262e-249	0.326982	0.911	0.532	1.44478e-244	HCC
Fabp4	0	2.54455	0.704	0.097	0	Endo
Ptprb	0	2.3899	0.649	0.051	0	Endo
Aqp1	0	2.36646	0.661	0.052	0	Endo
Kdr	0	2.26437	0.657	0.052	0	Endo
Ehd3	0	2.22507	0.649	0.067	0	Endo
Maf	0	2.05324	0.695	0.119	0	Endo
Egfl7	0	1.94382	0.55	0.078	0	Endo
Stab2	0	1.93912	0.521	0.045	0	Endo
Mrc1	0	1.85006	0.549	0.065	0	Endo
Ets1	0	1.77156	0.503	0.071	0	Endo
Stab1	0	1.74696	0.483	0.07	0	Endo
Cdh5	0	1.741	0.472	0.045	0	Endo
Adgrf5	0	1.72321	0.437	0.03	0	Endo
Sparc	0	1.71268	0.655	0.096	0	Endo
Gng11	0	1.69856	0.499	0.166	0	Endo
Arhgap31	0	1.69823	0.451	0.045	0	Endo
Dnase1l3	0	1.69196	0.387	0.029	0	Endo
Flt1	0	1.68559	0.403	0.031	0	Endo
Sptbn1	0	1.67981	0.569	0.298	0	Endo
Plpp3	0	1.67959	0.476	0.218	0	Endo
Col4a1	0	1.67545	0.52	0.073	0	Endo
Gpr182	0	1.67102	0.408	0.038	0	Endo
Igfbp7	0	1.64827	0.581	0.125	0	Endo
Snrk	0	1.63539	0.436	0.087	0	Endo
Pcdh17	0	1.61471	0.38	0.027	0	Endo
Rapgef5	0	1.61356	0.414	0.053	0	Endo
Clec4g	0	1.60823	0.353	0.027	0	Endo
Pecam1	0	1.59908	0.396	0.029	0	Endo
Fcgr2b	0	1.59795	0.388	0.075	0	Endo
Cd55	0	1.58463	0.379	0.032	0	Endo
Oit3	0	1.58384	0.365	0.026	0	Endo
Tcf4	0	1.5783	0.478	0.116	0	Endo
Plxnd1	0	1.57796	0.416	0.04	0	Endo
Lyve1	0	1.5632	0.329	0.026	0	Endo
Timp3	0	1.55249	0.4	0.048	0	Endo
Cavin2	0	1.53733	0.379	0.096	0	Endo
Ccnd1	0	1.53685	0.437	0.23	0	Endo
Macf1	0	1.52955	0.505	0.163	0	Endo
Gpihbp1	0	1.52038	0.341	0.031	0	Endo
Flt4	0	1.48974	0.344	0.028	0	Endo
Nr2f2	0	1.47944	0.397	0.125	0	Endo
Hmcn1	0	1.4686	0.314	0.026	0	Endo
Marcks	0	1.46035	0.52	0.097	0	Endo
Nrp1	0	1.44301	0.367	0.068	0	Endo
Fyn	0	1.43312	0.353	0.033	0	Endo
Ramp2	0	1.43278	0.337	0.047	0	Endo
Col4a2	0	1.42864	0.385	0.047	0	Endo
Malat1	0	1.4272	0.999	0.668	0	Endo
Calcrl	0	1.41743	0.304	0.021	0	Endo
Hspg2	0	1.41482	0.352	0.041	0	Endo
Bmp2	0	1.4145	0.321	0.024	0	Endo
Eng	0	1.40966	0.344	0.031	0	Endo
Lrrc58	0	1.39412	0.414	0.203	0	Endo
Fus	0	1.38568	0.562	0.369	0	Endo
Meis2	0	1.3839	0.308	0.035	0	Endo
Arap3	0	1.37585	0.329	0.028	0	Endo
Sash1	0	1.37215	0.419	0.129	0	Endo
Plk2	0	1.36901	0.329	0.081	0	Endo
Tpm4	0	1.36587	0.442	0.198	0	Endo
Dlc1	0	1.36445	0.36	0.125	0	Endo
Gatm	0	1.36353	0.325	0.043	0	Endo
Cldn5	0	1.3519	0.287	0.02	0	Endo
Ccnd2	0	1.35175	0.324	0.042	0	Endo
Rasip1	0	1.34886	0.316	0.026	0	Endo
Mmrn2	0	1.34651	0.299	0.018	0	Endo
Plpp1	0	1.3455	0.313	0.109	0	Endo
Esam	0	1.34148	0.31	0.024	0	Endo
Dab2	0	1.33678	0.33	0.035	0	Endo
Akap12	0	1.32059	0.283	0.023	0	Endo
Nrp2	0	1.30231	0.293	0.024	0	Endo
Adgrl4	0	1.29807	0.282	0.018	0	Endo
Ushbp1	0	1.28651	0.281	0.022	0	Endo
Elk3	0	1.28203	0.299	0.035	0	Endo
Tinagl1	0	1.28111	0.303	0.04	0	Endo
Cd36	0	1.28101	0.317	0.09	0	Endo
Fam167b	0	1.27966	0.281	0.024	0	Endo
Tmem2	0	1.27685	0.288	0.038	0	Endo
Mef2c	0	1.27641	0.345	0.05	0	Endo
Plekhg1	0	1.26902	0.278	0.022	0	Endo
Ltbp4	0	1.26656	0.272	0.03	0	Endo
Acer2	0	1.26649	0.268	0.035	0	Endo
Cd38	0	1.25956	0.314	0.037	0	Endo
Tacc1	0	1.25835	0.345	0.117	0	Endo
Il6st	0	1.23763	0.301	0.104	0	Endo
Amotl1	0	1.22566	0.278	0.03	0	Endo
Sgk1	0	1.19379	0.324	0.108	0	Endo
Msn	0	1.1904	0.327	0.055	0	Endo
Heg1	0	1.18831	0.28	0.061	0	Endo
Prex2	0	1.1845	0.261	0.024	0	Endo
Epb41l2	0	1.16068	0.293	0.061	0	Endo
Rgl1	0	1.15999	0.289	0.072	0	Endo
Itga1	0	1.12846	0.301	0.093	0	Endo
Gm42418	0	1.12507	1	1	0	Endo
Pkm	0	1.09971	0.318	0.103	0	Endo
Map4k4	0	1.09394	0.286	0.079	0	Endo
Klf7	0	1.07881	0.261	0.057	0	Endo
Marcksl1	0	1.07413	0.279	0.067	0	Endo
Tmsb4x	0	0.993046	0.663	0.225	0	Endo
Sdc3	0	0.846106	0.297	0.079	0	Endo
Rpl38	0	0.626646	0.879	0.925	0	Endo
mt-Co1	0	0.597242	0.998	0.987	0	Endo
mt-Atp6	5.63988e-290	0.546309	0.854	0.858	1.75135e-285	Endo
Adgrl2	4.58165e-286	1.14334	0.27	0.094	1.42274e-281	Endo
Sh3bp5	2.74527e-269	1.32268	0.4	0.217	8.52487e-265	Endo
Sem1	7.12682e-268	0.720376	0.743	0.827	2.21309e-263	Endo
Tspan7	1.49515e-264	1.33217	0.331	0.152	4.64289e-260	Endo
Tmsb10	5.60104e-250	0.812099	0.642	0.535	1.73929e-245	Endo
App	9.06051e-243	1.28749	0.442	0.278	2.81356e-238	Endo
mt-Nd1	2.30635e-241	0.376098	0.892	0.859	7.16191e-237	Endo
Mef2a	5.24513e-228	1.11181	0.332	0.16	1.62877e-223	Endo
Myo10	5.09515e-225	1.12016	0.283	0.121	1.5822e-220	Endo
Qk	9.12259e-216	1.09381	0.289	0.129	2.83284e-211	Endo
Rpl37a	4.93698e-215	0.59438	0.778	0.872	1.53308e-210	Endo
Nfib	1.34697e-210	1.15115	0.389	0.229	4.18273e-206	Endo
Son	1.54916e-196	1.06908	0.534	0.451	4.81061e-192	Endo
Arhgap29	4.60597e-182	1.14872	0.289	0.145	1.43029e-177	Endo
Rbms1	2.01819e-181	1.21641	0.426	0.299	6.26709e-177	Endo
Dusp3	8.86884e-181	1.15386	0.317	0.171	2.75404e-176	Endo
Ralgapa2	5.78114e-178	1.07849	0.259	0.119	1.79522e-173	Endo
Itgb1	1.65588e-176	1.16204	0.497	0.417	5.14199e-172	Endo
Rplp2	3.76549e-175	0.455004	0.773	0.903	1.1693e-170	Endo
Tln1	1.87111e-168	1.0043	0.343	0.196	5.81035e-164	Endo
Sirpa	8.33259e-166	0.92298	0.29	0.143	2.58752e-161	Endo
Atrx	7.68967e-162	1.15331	0.392	0.266	2.38787e-157	Endo
Gm10076	5.12897e-154	0.301883	0.902	0.976	1.5927e-149	Endo
Spag9	1.73935e-153	1.11193	0.324	0.192	5.40121e-149	Endo
Hnrnpa0	5.69601e-143	0.956714	0.307	0.174	1.76878e-138	Endo
Ppp3ca	5.22195e-138	1.00372	0.285	0.158	1.62157e-133	Endo
Rps28	1.96031e-137	0.61681	0.7	0.811	6.08735e-133	Endo
Gm26917	4.96548e-137	1.02013	0.462	0.364	1.54193e-132	Endo
Rps21	9.00666e-136	0.530366	0.729	0.856	2.79684e-131	Endo
Rpl35a	7.34041e-133	0.590753	0.691	0.799	2.27942e-128	Endo
Wasl	1.13385e-125	0.260893	0.126	0.365	3.52095e-121	Endo
Gnai2	1.17931e-125	1.04415	0.364	0.254	3.66211e-121	Endo
Txnip	1.41142e-123	1.09421	0.38	0.28	4.3829e-119	Endo
Nfe2l1	9.76855e-123	0.999276	0.277	0.16	3.03343e-118	Endo
Nxf1	4.01764e-120	0.258448	0.169	0.432	1.2476e-115	Endo
Id3	4.37815e-120	0.935413	0.439	0.356	1.35955e-115	Endo
Ptbp3	1.20617e-119	1.03893	0.364	0.261	3.74551e-115	Endo
Clic4	2.26162e-116	1.02362	0.302	0.19	7.02301e-112	Endo
Ctsb	1.45529e-115	0.708062	0.59	0.672	4.51912e-111	Endo
mt-Co3	1.78027e-115	0.291431	0.932	0.966	5.52826e-111	Endo
Rpl23	2.34142e-115	0.322429	0.789	0.932	7.2708e-111	Endo
Ktn1	3.53607e-114	0.956559	0.291	0.177	1.09805e-109	Endo
Tpm3	4.35884e-114	1.02159	0.514	0.531	1.35355e-109	Endo
Psap	1.78775e-113	0.606445	0.566	0.592	5.55149e-109	Endo
Pttg1ip	2.54982e-112	0.293908	0.158	0.407	7.91796e-108	Endo
Ggnbp2	6.44402e-108	0.263844	0.132	0.351	2.00106e-103	Endo
Cmtm8	1.51276e-107	0.309811	0.186	0.454	4.69757e-103	Endo
Dynll2	4.0253e-107	0.25912	0.177	0.432	1.24998e-102	Endo
Rab11b	1.11171e-106	0.267245	0.157	0.397	3.45221e-102	Endo
Rdx	4.97469e-106	0.277657	0.19	0.457	1.54479e-101	Endo
Cdc37	3.12044e-104	0.262658	0.14	0.363	9.68991e-100	Endo
Rps29	7.51257e-104	0.564405	0.676	0.792	2.33288e-99	Endo
Arpc4	2.25046e-103	0.252408	0.156	0.389	6.98835e-99	Endo
Tpst2	2.34437e-103	0.305863	0.134	0.353	7.27997e-99	Endo
Calm1	2.01305e-101	0.725722	0.596	0.713	6.25113e-97	Endo
Arhgef12	3.25866e-101	0.957213	0.259	0.156	1.01191e-96	Endo
Tm9sf2	5.72623e-101	0.278615	0.163	0.4	1.77817e-96	Endo
Aph1a	2.11795e-98	0.255969	0.098	0.282	6.57688e-94	Endo
Eif4a1	2.68901e-97	0.254492	0.178	0.421	8.35018e-93	Endo
Pdcd10	5.91465e-97	0.271838	0.141	0.355	1.83668e-92	Endo
Tsc22d4	2.32101e-96	0.942591	0.295	0.194	7.20742e-92	Endo
Gm16286	6.70873e-96	0.289628	0.126	0.328	2.08326e-91	Endo
Sypl	1.18715e-95	0.296367	0.163	0.395	3.68647e-91	Endo
Rbm39	3.09909e-95	0.928764	0.493	0.498	9.6236e-91	Endo
Arpc3	1.32917e-94	0.25403	0.218	0.493	4.12748e-90	Endo
Mycbp2	1.82176e-94	0.850464	0.269	0.165	5.65711e-90	Endo
Sat1	9.19446e-94	0.291023	0.252	0.547	2.85516e-89	Endo
Rab2a	2.16669e-92	0.252868	0.232	0.516	6.72822e-88	Endo
Ier3ip1	1.43212e-91	0.251657	0.177	0.409	4.44716e-87	Endo
Adipor1	2.74271e-91	0.344551	0.195	0.449	8.51693e-87	Endo
St3gal5	7.99539e-91	0.256066	0.202	0.452	2.48281e-86	Endo
Dusp6	8.21775e-91	0.252584	0.107	0.29	2.55186e-86	Endo
Golga7	3.92391e-89	0.361503	0.152	0.367	1.21849e-84	Endo
Jak1	3.18917e-88	1.24795	0.391	0.346	9.90334e-84	Endo
Psmd2	2.89503e-87	0.269638	0.137	0.336	8.98994e-83	Endo
St3gal4	3.51053e-87	0.251483	0.123	0.311	1.09013e-82	Endo
Slc39a7	9.61487e-87	0.274248	0.13	0.323	2.98571e-82	Endo
Smap1	1.0053e-85	0.366397	0.167	0.392	3.12177e-81	Endo
Dazap2	3.3773e-85	0.299138	0.174	0.398	1.04875e-80	Endo
Epn1	9.52415e-85	0.331548	0.141	0.34	2.95753e-80	Endo
Chic2	1.45848e-84	0.250408	0.108	0.282	4.52902e-80	Endo
Sri	2.52108e-83	0.267039	0.123	0.306	7.82871e-79	Endo
Adss	1.03099e-82	0.250214	0.114	0.29	3.20154e-78	Endo
Eef1g	2.99095e-82	0.268674	0.249	0.533	9.28778e-78	Endo
Tor1aip2	3.9027e-82	0.329096	0.141	0.337	1.2119e-77	Endo
Phf20l1	4.57182e-82	1.00478	0.304	0.219	1.41969e-77	Endo
Atp6v1d	1.77028e-80	0.358373	0.16	0.37	5.49724e-76	Endo
Dnajb6	2.42146e-80	0.362375	0.17	0.387	7.51936e-76	Endo
Pcbp2	8.34699e-80	0.342028	0.188	0.417	2.59199e-75	Endo
Hnrnph1	1.91593e-79	0.873451	0.265	0.173	5.94953e-75	Endo
Rpn1	1.51618e-78	0.265012	0.253	0.53	4.7082e-74	Endo
Srrm2	2.00658e-78	0.954142	0.471	0.491	6.23104e-74	Endo
St13	3.38683e-78	0.329852	0.22	0.472	1.05171e-73	Endo
Dpm3	1.73353e-77	0.281901	0.274	0.562	5.38313e-73	Endo
Rab5a	4.79509e-77	0.316055	0.119	0.293	1.48902e-72	Endo
Bax	1.14248e-76	0.274692	0.186	0.406	3.54773e-72	Endo
Bhlhe40	1.37934e-76	0.351415	0.146	0.339	4.28327e-72	Endo
Nostrin	1.83298e-76	0.37297	0.148	0.345	5.69195e-72	Endo
Twf1	6.64692e-76	0.297604	0.13	0.311	2.06407e-71	Endo
Serinc3	7.22067e-76	1.0294	0.389	0.345	2.24223e-71	Endo
Osbpl9	8.50837e-76	0.297064	0.127	0.304	2.64211e-71	Endo
Desi2	9.80919e-76	0.271381	0.113	0.281	3.04605e-71	Endo
Dhrs3	2.8732e-75	0.344187	0.114	0.282	8.92216e-71	Endo
Ccdc59	3.08744e-75	0.281564	0.118	0.287	9.58743e-71	Endo
Dnajc7	1.66099e-74	0.285015	0.097	0.253	5.15787e-70	Endo
Reep3	1.67031e-74	0.348232	0.221	0.471	5.18683e-70	Endo
Epas1	1.64376e-73	1.04871	0.298	0.224	5.10438e-69	Endo
mt-Nd4	1.69287e-72	0.281952	0.726	0.767	5.25687e-68	Endo
Pafah1b1	2.30338e-71	0.968472	0.444	0.445	7.15269e-67	Endo
Wbp4	1.40839e-70	0.290598	0.104	0.258	4.37346e-66	Endo
Ccdc12	6.73007e-68	0.298697	0.122	0.285	2.08989e-63	Endo
Actr3	2.30483e-67	0.304394	0.183	0.387	7.15719e-63	Endo
Arpc5	5.15468e-67	0.356423	0.201	0.421	1.60068e-62	Endo
Atp5k	9.18004e-67	0.262989	0.3	0.586	2.85068e-62	Endo
Actb	2.2501e-66	0.263405	0.791	0.885	6.98722e-62	Endo
Atf4	1.31959e-65	0.352328	0.157	0.341	4.09774e-61	Endo
Rab10	1.48239e-65	0.32234	0.13	0.296	4.60327e-61	Endo
Setd3	1.2006e-64	0.319504	0.126	0.288	3.72822e-60	Endo
Ddb1	4.50312e-64	0.264431	0.113	0.265	1.39835e-59	Endo
F11r	7.24523e-64	0.390084	0.242	0.494	2.24986e-59	Endo
Ctsd	8.01428e-64	0.254213	0.266	0.532	2.48868e-59	Endo
Sumo3	5.63437e-63	0.340111	0.14	0.309	1.74964e-58	Endo
Rap1a	1.36465e-62	0.384865	0.217	0.447	4.23766e-58	Endo
Clta	4.19018e-62	0.255151	0.277	0.552	1.30118e-57	Endo
Cebpg	5.02242e-62	0.331846	0.107	0.253	1.55961e-57	Endo
Xrn2	1.47823e-61	0.334277	0.134	0.296	4.59036e-57	Endo
Rab14	4.37683e-61	0.384003	0.245	0.495	1.35914e-56	Endo
Usp16	1.04801e-60	0.32856	0.117	0.267	3.25438e-56	Endo
Nr3c1	3.3124e-59	0.366676	0.122	0.274	1.0286e-54	Endo
Zmat2	6.59185e-59	0.263032	0.111	0.253	2.04697e-54	Endo
Rpl41	9.39392e-59	0.3304	0.715	0.899	2.91709e-54	Endo
Eif3b	1.25686e-57	0.327585	0.113	0.255	3.90291e-53	Endo
Prrc2c	6.8369e-56	0.900145	0.278	0.213	2.12306e-51	Endo
Dnajc1	1.68336e-55	0.349541	0.137	0.293	5.22734e-51	Endo
Npm1	7.4292e-54	0.305942	0.29	0.559	2.30699e-49	Endo
Ralgps2	1.9183e-53	1.00069	0.268	0.207	5.95688e-49	Endo
Vps36	2.23389e-53	0.328731	0.119	0.26	6.93689e-49	Endo
Tmem30a	2.15166e-52	0.396376	0.261	0.512	6.68154e-48	Endo
H2afy	3.90166e-52	0.304302	0.126	0.268	1.21158e-47	Endo
Ap2a2	3.90385e-52	0.875614	0.265	0.202	1.21226e-47	Endo
Pcmtd1	7.53543e-51	0.42669	0.156	0.319	2.33998e-46	Endo
Dhx15	2.28512e-50	0.839014	0.32	0.268	7.09597e-46	Endo
Rhoa	5.83372e-50	0.331016	0.281	0.541	1.81154e-45	Endo
Wwp1	1.83514e-49	0.369478	0.209	0.402	5.69866e-45	Endo
Mapk1	3.38631e-49	0.410117	0.145	0.297	1.05155e-44	Endo
Sft2d1	3.46025e-49	0.47968	0.221	0.433	1.07451e-44	Endo
Gnb2	7.56451e-49	0.331646	0.292	0.558	2.34901e-44	Endo
Nfe2l2	2.79476e-48	0.339238	0.151	0.303	8.67858e-44	Endo
Nol7	5.94945e-48	0.337031	0.314	0.591	1.84748e-43	Endo
Snrnp70	1.02067e-47	0.894543	0.413	0.422	3.16948e-43	Endo
Cdk4	1.64656e-47	0.374816	0.13	0.27	5.11306e-43	Endo
Cnn3	2.65371e-47	0.434291	0.219	0.423	8.24055e-43	Endo
Etnk1	1.71923e-46	0.305646	0.124	0.257	5.33871e-42	Endo
Vps35	5.25244e-45	0.366176	0.126	0.259	1.63104e-40	Endo
Sec63	8.09732e-45	0.318234	0.127	0.259	2.51446e-40	Endo
Rbm8a	2.28678e-44	0.392447	0.16	0.312	7.10114e-40	Endo
Eif4ebp2	3.81554e-44	0.342715	0.128	0.26	1.18484e-39	Endo
Dnaja1	8.92265e-44	0.333493	0.31	0.581	2.77075e-39	Endo
Kras	4.93957e-43	0.353606	0.127	0.257	1.53388e-38	Endo
Klf3	1.38437e-42	0.439137	0.175	0.336	4.29889e-38	Endo
Nono	3.40031e-42	0.36337	0.13	0.26	1.0559e-37	Endo
Zcchc6	3.87612e-42	0.862949	0.266	0.215	1.20365e-37	Endo
Eif4h	4.03363e-42	0.415216	0.142	0.28	1.25256e-37	Endo
Bcl10	9.15041e-42	0.367473	0.125	0.252	2.84148e-37	Endo
Tceal9	1.20677e-41	0.426783	0.245	0.459	3.7474e-37	Endo
Spop	3.12471e-41	0.367308	0.142	0.277	9.70317e-37	Endo
Hp1bp3	4.73485e-41	0.377886	0.15	0.291	1.47031e-36	Endo
Ywhaz	9.07229e-41	0.369301	0.286	0.529	2.81722e-36	Endo
Sf1	1.74423e-40	0.387819	0.141	0.275	5.41636e-36	Endo
Hnrnpdl	1.91027e-40	0.445708	0.186	0.351	5.93195e-36	Endo
Xiap	3.43883e-40	0.912257	0.28	0.237	1.06786e-35	Endo
Fkbp1a	7.8622e-40	0.938095	0.439	0.518	2.44145e-35	Endo
Morf4l1	8.49537e-39	0.751532	0.505	0.639	2.63807e-34	Endo
Ythdc1	1.58434e-38	0.809538	0.253	0.203	4.91985e-34	Endo
Dnajc10	2.87767e-38	0.369108	0.142	0.273	8.93603e-34	Endo
Golgb1	2.90239e-38	0.462935	0.183	0.344	9.01278e-34	Endo
Ssb	3.80406e-38	0.481729	0.239	0.442	1.18127e-33	Endo
H1f0	1.31354e-37	0.325761	0.33	0.595	4.07894e-33	Endo
Grn	1.37826e-37	0.416429	0.234	0.423	4.27991e-33	Endo
Igfbp4	2.66812e-37	0.51149	0.559	0.701	8.28533e-33	Endo
Myl6	8.24597e-37	0.386138	0.613	0.812	2.56062e-32	Endo
Wdr1	2.63348e-36	0.445682	0.169	0.314	8.17775e-32	Endo
Nsa2	3.04046e-36	0.411962	0.265	0.48	9.44153e-32	Endo
Lgmn	3.25693e-36	0.828149	0.406	0.428	1.01138e-31	Endo
Atxn7l3b	1.47753e-35	0.469899	0.228	0.416	4.58816e-31	Endo
Cdk11b	1.61362e-35	0.882487	0.303	0.274	5.01078e-31	Endo
Gcc2	3.59548e-35	0.46597	0.19	0.348	1.1165e-30	Endo
Hsp90aa1	4.67085e-35	0.300016	0.197	0.35	1.45044e-30	Endo
Tnfrsf1a	5.35361e-35	0.517753	0.223	0.411	1.66246e-30	Endo
Frmd4b	9.28025e-34	0.424579	0.147	0.272	2.8818e-29	Endo
Nucb1	2.59944e-33	0.462027	0.147	0.275	8.07205e-29	Endo
Sec31a	6.52179e-33	0.41348	0.143	0.265	2.02521e-28	Endo
Eif3c	1.05945e-32	0.433981	0.265	0.476	3.2899e-28	Endo
Rpl22	1.82143e-32	0.386364	0.618	0.828	5.65609e-28	Endo
Copa	2.24759e-32	0.406733	0.141	0.261	6.97945e-28	Endo
Man2a1	9.09046e-31	0.843468	0.298	0.275	2.82286e-26	Endo
Srrm1	1.11686e-30	0.494137	0.218	0.389	3.4682e-26	Endo
Arl6ip1	1.05934e-29	0.414497	0.261	0.455	3.28956e-25	Endo
Nedd4	1.11763e-29	0.918863	0.416	0.486	3.47057e-25	Endo
Mbnl1	1.71321e-29	0.753584	0.275	0.24	5.32004e-25	Endo
Ptma	2.06326e-29	0.365789	0.592	0.764	6.40703e-25	Endo
Tomm7	2.89635e-29	0.357433	0.358	0.629	8.99404e-25	Endo
Rac1	4.03213e-29	0.447353	0.301	0.538	1.2521e-24	Endo
Serbp1	4.1125e-29	0.395441	0.322	0.574	1.27705e-24	Endo
Metap2	4.16331e-29	0.855945	0.431	0.509	1.29283e-24	Endo
Sfpq	7.35377e-29	0.828485	0.282	0.254	2.28357e-24	Endo
Ube3a	1.71362e-28	0.384365	0.141	0.252	5.32131e-24	Endo
Fcgrt	2.87939e-28	1.01779	0.316	0.316	8.94136e-24	Endo
mt-Nd3	3.29572e-28	0.351568	0.2	0.339	1.02342e-23	Endo
Degs1	4.46404e-28	0.602718	0.214	0.382	1.38622e-23	Endo
Bclaf1	5.19384e-28	0.794558	0.251	0.216	1.61284e-23	Endo
Csnk1a1	1.69721e-27	0.838621	0.381	0.414	5.27034e-23	Endo
Dusp11	5.53983e-27	0.490939	0.188	0.327	1.72028e-22	Endo
Arhgdia	9.69259e-27	0.516017	0.216	0.376	3.00984e-22	Endo
Prkar1a	1.21027e-26	0.409408	0.327	0.581	3.75825e-22	Endo
Mtdh	1.40101e-26	0.429438	0.268	0.462	4.35055e-22	Endo
Smarca5	2.1189e-26	0.402704	0.163	0.282	6.57981e-22	Endo
Srsf2	2.79364e-26	0.540392	0.22	0.381	8.67509e-22	Endo
Matr3	3.4675e-26	0.422993	0.143	0.251	1.07676e-21	Endo
Rab5c	5.73046e-26	0.502263	0.168	0.293	1.77948e-21	Endo
Rbm25	1.27986e-25	0.867188	0.353	0.37	3.97435e-21	Endo
Lars2	1.94754e-25	0.531846	0.515	0.614	6.04771e-21	Endo
S100a13	3.78429e-25	0.811122	0.272	0.248	1.17514e-20	Endo
Sh3glb1	1.18585e-24	0.509754	0.286	0.497	3.68241e-20	Endo
AC149090.1	1.24223e-24	0.852361	0.257	0.229	3.8575e-20	Endo
Cdipt	6.80653e-24	0.541979	0.163	0.281	2.11363e-19	Endo
Llph	7.54705e-24	0.493326	0.298	0.512	2.34359e-19	Endo
Tcea1	8.05064e-24	0.463991	0.308	0.531	2.49997e-19	Endo
Eif2s2	1.19819e-23	0.619212	0.514	0.677	3.72075e-19	Endo
Tgoln1	2.83311e-23	0.478952	0.173	0.296	8.79767e-19	Endo
Rplp1	9.10991e-23	0.289947	0.641	0.853	2.8289e-18	Endo
Zranb2	9.53421e-23	0.500103	0.214	0.359	2.96066e-18	Endo
Ostf1	1.44494e-22	0.541822	0.186	0.315	4.48697e-18	Endo
B230219D22Rik	1.61945e-22	0.880987	0.309	0.311	5.02889e-18	Endo
Cops9	1.90359e-22	0.329566	0.378	0.636	5.91121e-18	Endo
Ywhah	2.98001e-22	0.495698	0.261	0.442	9.25383e-18	Endo
Pdcd6ip	5.87374e-22	0.437586	0.165	0.277	1.82397e-17	Endo
Ddx50	7.44384e-22	0.530499	0.184	0.31	2.31153e-17	Endo
Rap1b	8.75565e-22	0.442968	0.159	0.267	2.71889e-17	Endo
Bnip2	4.40881e-21	0.881621	0.267	0.255	1.36907e-16	Endo
Ddx39b	4.44099e-21	0.542947	0.211	0.35	1.37906e-16	Endo
Dek	9.59772e-21	0.488338	0.198	0.328	2.98038e-16	Endo
Hnrnpk	1.03109e-20	0.38558	0.36	0.62	3.20183e-16	Endo
Actn4	1.3063e-20	0.865976	0.283	0.276	4.05646e-16	Endo
Bola2	2.35848e-20	0.47077	0.275	0.452	7.32378e-16	Endo
Cox17	4.6491e-20	0.387632	0.341	0.563	1.44369e-15	Endo
Set	6.3192e-20	0.480623	0.205	0.337	1.9623e-15	Endo
Caprin1	1.26502e-19	0.493008	0.187	0.307	3.92825e-15	Endo
Srsf3	1.41636e-19	0.469333	0.211	0.344	4.39821e-15	Endo
Cdc42	3.35851e-19	0.624266	0.492	0.664	1.04292e-14	Endo
Hes1	6.35614e-19	0.394955	0.228	0.362	1.97377e-14	Endo
G3bp2	1.51209e-18	0.580067	0.201	0.33	4.6955e-14	Endo
Eif3a	4.9171e-18	0.763979	0.372	0.417	1.52691e-13	Endo
Luc7l2	6.15195e-18	0.844427	0.328	0.349	1.91036e-13	Endo
Capza2	8.79238e-18	0.540487	0.267	0.44	2.7303e-13	Endo
Ppp1r2	3.34276e-17	0.9708	0.293	0.307	1.03803e-12	Endo
Eif4a2	3.38837e-17	0.757763	0.256	0.242	1.05219e-12	Endo
Smc1a	3.52313e-17	0.496255	0.161	0.261	1.09404e-12	Endo
Hectd1	9.97275e-17	0.460597	0.162	0.259	3.09684e-12	Endo
Romo1	1.20108e-16	0.336426	0.407	0.67	3.7297e-12	Endo
Slc29a1	1.84777e-16	0.989159	0.31	0.336	5.73789e-12	Endo
Ddx24	3.16085e-16	0.585386	0.222	0.359	9.81538e-12	Endo
1700020I14Rik	5.29879e-16	0.833834	0.258	0.253	1.64543e-11	Endo
Ap2s1	1.61049e-15	0.631497	0.249	0.406	5.00105e-11	Endo
Sdcbp	9.56718e-15	0.539301	0.251	0.401	2.9709e-10	Endo
Vcp	1.63314e-14	0.473275	0.314	0.508	5.07139e-10	Endo
Csde1	2.52115e-14	0.478334	0.197	0.307	7.82892e-10	Endo
Sec62	4.62326e-14	0.505175	0.33	0.546	1.43566e-09	Endo
Dnajc8	5.52265e-14	0.542719	0.199	0.311	1.71495e-09	Endo
Srsf5	5.69651e-14	0.750926	0.366	0.419	1.76894e-09	Endo
Calu	6.24771e-14	0.517517	0.19	0.296	1.9401e-09	Endo
Csnk2a1	7.54213e-14	0.485241	0.175	0.271	2.34206e-09	Endo
Dusp1	1.05559e-13	0.753465	0.27	0.269	3.27794e-09	Endo
Hnrnpu	1.58857e-13	0.559345	0.273	0.437	4.93298e-09	Endo
Serpinb6a	2.17877e-12	0.475464	0.197	0.301	6.76574e-08	Endo
U2surp	2.36751e-12	0.536957	0.182	0.279	7.35184e-08	Endo
Lamp2	4.90726e-12	0.561968	0.322	0.522	1.52385e-07	Endo
Hnrnpm	5.44347e-12	0.537134	0.218	0.333	1.69036e-07	Endo
Rps27	3.04508e-11	0.414015	0.36	0.569	9.45589e-07	Endo
Aplp2	4.44084e-11	0.732787	0.355	0.408	1.37901e-06	Endo
Pkn2	5.89188e-11	0.833835	0.316	0.355	1.82961e-06	Endo
Klf6	1.65209e-09	0.439182	0.185	0.268	5.13023e-05	Endo
Ccnl2	3.239e-09	0.58005	0.176	0.26	0.000100581	Endo
Ddx5	4.09148e-09	0.741282	0.409	0.533	0.000127053	Endo
Ncl	1.04858e-08	0.716542	0.347	0.406	0.000325615	Endo
Pabpc1	1.37478e-08	0.479799	0.365	0.58	0.00042691	Endo
Sept7	2.16459e-08	0.581298	0.302	0.472	0.000672169	Endo
Sf3b2	3.74969e-08	0.53171	0.202	0.294	0.00116439	Endo
Scaf11	5.34728e-08	0.575376	0.203	0.297	0.00166049	Endo
Snx6	5.86719e-08	0.595589	0.211	0.311	0.00182194	Endo
Zbtb20	8.12754e-08	0.595788	0.253	0.259	0.00252385	Endo
Mtss1	9.402e-08	0.819908	0.271	0.299	0.0029196	Endo
Kif5b	1.26169e-07	0.588614	0.206	0.3	0.00391794	Endo
Phldb2	1.50928e-07	0.571915	0.188	0.272	0.00468678	Endo
Anp32a	1.72836e-07	0.55894	0.349	0.556	0.00536709	Endo
Rpl9	3.01441e-07	0.373539	0.418	0.671	0.00936065	Endo
Raph1	3.72571e-07	0.780297	0.254	0.273	0.0115695	Endo
Tuba1b	3.90755e-07	0.526136	0.321	0.486	0.0121341	Endo
Cd59a	5.79277e-07	0.657566	0.194	0.282	0.0179883	Endo
Canx	6.22971e-07	0.45618	0.368	0.565	0.0193451	Endo
Rpl27a	8.94287e-07	0.254189	0.465	0.743	0.0277703	Endo
Ptp4a2	1.08644e-06	0.523101	0.223	0.317	0.0337373	Endo
Acin1	3.17767e-06	0.572908	0.184	0.259	0.0986762	Endo
Eif4g1	3.22392e-06	0.592612	0.256	0.375	0.100112	Endo
Lasp1	3.90588e-06	0.503493	0.192	0.268	0.121289	Endo
Ewsr1	1.51345e-05	0.619163	0.219	0.31	0.469971	Endo
Nfkbia	4.28315e-05	0.542957	0.213	0.294	1	Endo
Tm9sf3	6.22876e-05	0.601245	0.291	0.428	1	Endo
Top1	9.06578e-05	0.792347	0.323	0.397	1	Endo
Scarb2	0.000101531	0.597947	0.2	0.276	1	Endo
Zfand5	0.000111228	0.628234	0.262	0.378	1	Endo
Tpr	0.00015641	0.607858	0.302	0.446	1	Endo
Srsf10	0.00017377	0.607715	0.204	0.281	1	Endo
Srsf6	0.00021795	0.570719	0.185	0.251	1	Endo
Cggbp1	0.000439032	0.728353	0.281	0.327	1	Endo
Srsf11	0.000494595	0.683408	0.239	0.339	1	Endo
Atpif1	0.000913711	0.49474	0.486	0.699	1	Endo
Eif4g2	0.00132149	0.647727	0.382	0.501	1	Endo
Nucks1	0.00146269	0.515613	0.19	0.251	1	Endo
Ubc	0.00211006	0.336321	0.436	0.642	1	Endo
Hnrnpl	0.00227954	0.617981	0.235	0.322	1	Endo
Snx2	0.00477034	0.632214	0.192	0.256	1	Endo
Calm2	0.00488987	0.541435	0.456	0.665	1	Endo
Vamp5	0.00523793	0.693597	0.238	0.328	1	Endo
Actr2	0.00799612	0.654213	0.241	0.272	1	Endo
Cltc	0.00919711	0.740741	0.268	0.32	1	Endo
Spp1	0	2.87203	0.897	0.318	0	Chol
Epcam	0	2.55336	0.759	0.008	0	Chol
Mmp7	0	2.06352	0.52	0.007	0	Chol
Gas6	0	2.01607	0.844	0.088	0	Chol
Cldn7	0	1.96242	0.698	0.033	0	Chol
Ankrd1	0	1.70723	0.399	0.003	0	Chol
Bicc1	0	1.64435	0.737	0.059	0	Chol
Cldn4	0	1.62397	0.466	0.001	0	Chol
Igfbp7	0	1.59011	0.82	0.168	0	Chol
Ezr	0	1.57789	0.73	0.086	0	Chol
Cd24a	0	1.53893	0.621	0.025	0	Chol
Tm4sf1	0	1.49897	0.57	0.047	0	Chol
Pdzk1ip1	0	1.48082	0.576	0.1	0	Chol
Scara3	0	1.3881	0.617	0.004	0	Chol
Fxyd3	0	1.28148	0.577	0.007	0	Chol
Ddit4l	0	1.27637	0.543	0.042	0	Chol
Cryab	0	1.17828	0.559	0.012	0	Chol
Rgs5	0	1.15338	0.45	0.019	0	Chol
Dcdc2a	0	1.13284	0.534	0.003	0	Chol
Krt7	0	1.08713	0.459	0.001	0	Chol
Bcam	0	1.08478	0.552	0.057	0	Chol
Ehf	0	1.05024	0.471	0.001	0	Chol
Pkhd1	0	1.04934	0.489	0.025	0	Chol
Anxa3	0	1.03589	0.525	0.05	0	Chol
Wfdc2	0	1.03344	0.504	0.015	0	Chol
Krt19	0	1.00945	0.482	0.001	0	Chol
Tmem45a	0	0.993872	0.439	0.002	0	Chol
Timp2	0	0.975963	0.487	0.024	0	Chol
Prr15l	0	0.975019	0.475	0.005	0	Chol
Tesc	0	0.935268	0.45	0.008	0	Chol
Ctgf	0	0.923429	0.358	0.03	0	Chol
Efemp1	0	0.851357	0.451	0.003	0	Chol
Kcne3	0	0.801439	0.423	0.008	0	Chol
Sftpd	0	0.800335	0.399	0.002	0	Chol
Fgfr3	0	0.796799	0.311	0.011	0	Chol
Tspan3	0	0.794948	0.468	0.021	0	Chol
Cyba	0	0.779176	0.603	0.086	0	Chol
Clcf1	0	0.778148	0.383	0.034	0	Chol
Bex4	0	0.77514	0.441	0.049	0	Chol
Slc25a4	0	0.774288	0.527	0.051	0	Chol
Plp2	0	0.77237	0.437	0.046	0	Chol
Serinc2	0	0.77057	0.433	0.025	0	Chol
Serpinh1	0	0.756496	0.469	0.035	0	Chol
Rab25	0	0.755501	0.399	0.002	0	Chol
Muc1	0	0.754527	0.374	0.001	0	Chol
Ddah2	0	0.741022	0.457	0.031	0	Chol
Mal	0	0.687924	0.362	0.002	0	Chol
Tinagl1	0	0.677926	0.513	0.063	0	Chol
Casp12	0	0.666841	0.376	0.037	0	Chol
Rab27b	0	0.641944	0.345	0.002	0	Chol
Sema3c	0	0.630223	0.254	0.001	0	Chol
Tnfaip8	0	0.626185	0.405	0.028	0	Chol
Ctxn1	0	0.624432	0.371	0.008	0	Chol
F3	0	0.618602	0.32	0.018	0	Chol
Pdgfc	0	0.609925	0.32	0.022	0	Chol
Kcnn4	0	0.608591	0.309	0.008	0	Chol
Arrdc1	0	0.603436	0.351	0.019	0	Chol
Spint1	0	0.602227	0.344	0.002	0	Chol
Pamr1	0	0.581269	0.302	0.002	0	Chol
Rhoj	0	0.556158	0.392	0.028	0	Chol
Slc5a1	0	0.553267	0.304	0.002	0	Chol
Celf2	0	0.548866	0.324	0.026	0	Chol
Pdgfd	0	0.548845	0.327	0.002	0	Chol
Ptpn13	0	0.548483	0.263	0.002	0	Chol
St14	0	0.53789	0.266	0.006	0	Chol
Rbms3	0	0.534724	0.304	0.013	0	Chol
Fermt1	0	0.532998	0.272	0.001	0	Chol
Elf3	0	0.530285	0.275	0.02	0	Chol
Krtcap3	0	0.523205	0.3	0.004	0	Chol
Ap1m2	0	0.510245	0.317	0.001	0	Chol
Ppp2r2b	0	0.509788	0.279	0.002	0	Chol
1700011H14Rik	0	0.498025	0.309	0.003	0	Chol
Trim47	0	0.495468	0.304	0.023	0	Chol
Kcnk1	0	0.466056	0.284	0	0	Chol
Palm	0	0.465806	0.291	0.017	0	Chol
Sestd1	0	0.462297	0.27	0.011	0	Chol
Degs2	0	0.443606	0.264	0	0	Chol
Sfn	0	0.442662	0.254	0.005	0	Chol
Gm609	0	0.436512	0.257	0.012	0	Chol
Cav1	0	0.43593	0.255	0.007	0	Chol
Tmc4	0	0.431366	0.266	0.007	0	Chol
Apobec3	0	0.426095	0.284	0.02	0	Chol
Ecscr	0	0.41996	0.3	0.013	0	Chol
Ramp1	0	0.419106	0.277	0.008	0	Chol
Zc2hc1a	0	0.404428	0.268	0.01	0	Chol
Atp6v0e2	0	0.390531	0.261	0.01	0	Chol
St3gal6	0	0.374581	0.259	0.016	0	Chol
Marcksl1	1.07253e-307	0.771456	0.556	0.084	3.33053e-303	Chol
Gata6	1.43088e-305	0.807674	0.444	0.061	4.4433e-301	Chol
Hspb1	4.52043e-304	0.579178	0.32	0.03	1.40373e-299	Chol
Trim35	6.00704e-303	0.42469	0.293	0.024	1.86537e-298	Chol
Sox4	2.91524e-291	0.955185	0.482	0.068	9.05269e-287	Chol
Car2	2.29773e-288	0.708423	0.378	0.046	7.13514e-284	Chol
Ltb	1.11431e-287	0.667063	0.286	0.025	3.46027e-283	Chol
Sh2d4a	2.56538e-277	0.695431	0.412	0.058	7.96627e-273	Chol
Tuba1a	1.54662e-276	0.516927	0.336	0.035	4.80273e-272	Chol
S100a6	5.60405e-275	1.55218	0.574	0.103	1.74023e-270	Chol
Oxct1	5.19366e-270	0.38997	0.279	0.025	1.61279e-265	Chol
Tmem98	3.47519e-269	0.649943	0.399	0.055	1.07915e-264	Chol
Tmsb10	5.52195e-265	1.54042	0.975	0.54	1.71473e-260	Chol
Ckb	5.65214e-259	0.487008	0.333	0.036	1.75516e-254	Chol
Kifc3	2.63144e-253	0.995519	0.527	0.104	8.1714e-249	Chol
Sh3bgrl3	7.98947e-249	1.21215	0.649	0.16	2.48097e-244	Chol
Cd74	1.52949e-246	0.853522	0.574	0.109	4.74954e-242	Chol
Snhg18	4.62557e-245	0.612406	0.383	0.054	1.43638e-240	Chol
Plscr3	1.41013e-233	0.623382	0.444	0.075	4.37887e-229	Chol
Krt23	4.03137e-229	0.827772	0.428	0.074	1.25186e-224	Chol
Sox9	1.8659e-228	1.00841	0.504	0.104	5.79418e-224	Chol
Sparc	7.38312e-228	0.584854	0.709	0.152	2.29268e-223	Chol
Emp2	4.86554e-225	0.809162	0.489	0.101	1.5109e-220	Chol
Bmyc	1.35228e-222	0.69366	0.419	0.071	4.19925e-218	Chol
Dsg2	2.96516e-221	1.47652	0.723	0.236	9.2077e-217	Chol
Atp1b1	2.17283e-215	1.50892	0.773	0.335	6.7473e-211	Chol
Cracr2b	6.90449e-213	0.264516	0.266	0.028	2.14405e-208	Chol
Plaur	2.73528e-212	0.509486	0.275	0.031	8.49386e-208	Chol
Ddr1	9.04708e-211	0.630161	0.345	0.051	2.80939e-206	Chol
Csrp1	4.95072e-209	0.63005	0.41	0.071	1.53735e-204	Chol
Ptma	2.07212e-208	1.27392	0.948	0.741	6.43454e-204	Chol
Cdc42ep1	2.70282e-200	0.809149	0.516	0.122	8.39306e-196	Chol
Flna	9.342e-200	0.526074	0.365	0.054	2.90097e-195	Chol
Agrn	2.89219e-198	0.676092	0.281	0.035	8.98111e-194	Chol
Egr1	1.75437e-193	1.28955	0.871	0.408	5.44786e-189	Chol
Clic1	6.76283e-192	1.31446	0.64	0.207	2.10006e-187	Chol
Mfsd10	1.1244e-191	0.401049	0.257	0.03	3.4916e-187	Chol
Actg1	1.53955e-189	1.9054	0.91	0.678	4.78076e-185	Chol
Lurap1l	5.28496e-188	1.35671	0.622	0.213	1.64114e-183	Chol
Qpct	8.56491e-188	0.833016	0.442	0.096	2.65966e-183	Chol
H3f3b	1.10579e-185	1.27257	0.937	0.744	3.4338e-181	Chol
Bik	5.56232e-184	0.492239	0.342	0.056	1.72727e-179	Chol
Sorbs2	3.42924e-183	1.37853	0.696	0.259	1.06488e-178	Chol
Crip1	1.52376e-179	1.15652	0.486	0.104	4.73172e-175	Chol
Cyr61	3.72074e-179	1.30887	0.615	0.184	1.1554e-174	Chol
Csrp2	5.18642e-177	0.605177	0.471	0.105	1.61054e-172	Chol
Anxa5	1.9043e-172	1.78206	0.869	0.645	5.91341e-168	Chol
Tmsb4x	1.45355e-171	0.462001	0.867	0.266	4.5137e-167	Chol
Ucp2	1.89443e-171	1.03612	0.626	0.203	5.88278e-167	Chol
Nfib	3.32775e-164	1.05577	0.698	0.24	1.03337e-159	Chol
Rcn1	7.1968e-162	0.279911	0.266	0.036	2.23482e-157	Chol
Pld1	4.7893e-161	0.588232	0.36	0.068	1.48722e-156	Chol
Ift43	5.54649e-157	0.567437	0.394	0.085	1.72235e-152	Chol
App	7.99547e-156	0.821529	0.752	0.289	2.48283e-151	Chol
Ankrd10	1.99231e-155	0.400985	0.259	0.037	6.18673e-151	Chol
Grb10	4.19714e-154	0.394341	0.273	0.04	1.30334e-149	Chol
Cxcl16	1.53647e-153	0.489984	0.347	0.063	4.77119e-149	Chol
Clu	2.49685e-153	2.06333	0.959	0.804	7.75348e-149	Chol
Tsc22d1	2.25581e-151	0.858723	0.617	0.213	7.00497e-147	Chol
Myof	7.13936e-151	0.454622	0.3	0.05	2.21699e-146	Chol
Zbtb20	1.85283e-149	1.06095	0.685	0.251	5.75358e-145	Chol
Clmn	7.28437e-149	0.797085	0.317	0.058	2.26202e-144	Chol
Cirbp	9.33608e-147	1.08324	0.604	0.234	2.89913e-142	Chol
Enpp5	1.1994e-142	0.406522	0.297	0.053	3.72449e-138	Chol
Efhd2	4.16324e-142	0.681493	0.498	0.139	1.29281e-137	Chol
Tpm4	4.08009e-141	0.643363	0.653	0.219	1.26699e-136	Chol
Socs2	1.296e-138	0.848419	0.532	0.174	4.02446e-134	Chol
Rhob	9.04012e-136	0.795528	0.577	0.191	2.80723e-131	Chol
Pbx1	4.7984e-135	0.632123	0.299	0.054	1.49005e-130	Chol
Npdc1	7.49994e-135	0.710018	0.496	0.154	2.32896e-130	Chol
Ier3	2.73289e-134	1.15552	0.651	0.264	8.48644e-130	Chol
Krt8	5.97667e-134	1.01439	0.894	0.579	1.85593e-129	Chol
Fmo2	6.58541e-133	0.670521	0.306	0.06	2.04497e-128	Chol
Chmp4c	7.04043e-132	0.6149	0.327	0.069	2.18626e-127	Chol
Hnf1b	9.25727e-132	0.441651	0.252	0.041	2.87466e-127	Chol
Nfix	1.40273e-131	0.866658	0.421	0.107	4.35591e-127	Chol
Cpne8	1.90206e-131	0.731341	0.478	0.147	5.90646e-127	Chol
1700037H04Rik	5.89042e-129	0.401548	0.308	0.062	1.82915e-124	Chol
Snx17	6.45229e-129	0.466065	0.381	0.091	2.00363e-124	Chol
Nectin2	1.30224e-128	0.873048	0.529	0.186	4.04384e-124	Chol
Hsp90ab1	1.57325e-128	0.81036	0.937	0.773	4.88542e-124	Chol
Cd2ap	8.48767e-127	1.01137	0.667	0.277	2.63568e-122	Chol
Relb	5.41343e-126	0.520463	0.308	0.062	1.68103e-121	Chol
Junb	3.18691e-125	0.991993	0.874	0.564	9.8963e-121	Chol
Chd9	8.55853e-125	1.13571	0.728	0.394	2.65768e-120	Chol
Bgn	1.38711e-124	0.508731	0.302	0.055	4.30739e-120	Chol
Jun	3.20811e-124	1.02266	0.86	0.49	9.96214e-120	Chol
Lipt2	3.26546e-122	0.426124	0.297	0.061	1.01402e-117	Chol
Ier2	5.0799e-122	1.29969	0.775	0.475	1.57746e-117	Chol
Tmem123	1.55111e-121	0.404488	0.295	0.058	4.81666e-117	Chol
Thra	1.29314e-120	0.48511	0.354	0.081	4.01559e-116	Chol
Nedd4	1.31108e-120	0.823885	0.818	0.472	4.07131e-116	Chol
Ccnd1	8.87799e-118	0.738625	0.638	0.247	2.75688e-113	Chol
Cav2	1.34945e-117	0.514365	0.381	0.098	4.19043e-113	Chol
Tes	1.16465e-116	0.505996	0.345	0.082	3.6166e-112	Chol
Zfp36l2	3.58792e-116	0.590131	0.469	0.139	1.11416e-111	Chol
Hbegf	1.26255e-115	0.734792	0.406	0.111	3.9206e-111	Chol
S100a11	5.39912e-115	1.17768	0.685	0.369	1.67659e-110	Chol
Iqgap1	8.9133e-115	0.459168	0.45	0.12	2.76785e-110	Chol
Atf3	2.60038e-114	1.34782	0.646	0.278	8.07496e-110	Chol
Klf6	1.8576e-113	0.880623	0.619	0.252	5.76841e-109	Chol
Vezf1	1.2358e-112	0.424596	0.324	0.073	3.83754e-108	Chol
Tgfb2	1.62349e-112	0.52345	0.279	0.056	5.04143e-108	Chol
Afdn	8.44623e-111	0.616893	0.424	0.123	2.62281e-106	Chol
Lmo4	2.09464e-110	0.632122	0.433	0.128	6.50449e-106	Chol
F11r	9.03065e-110	0.892772	0.755	0.46	2.80429e-105	Chol
Timp3	1.30894e-109	0.704948	0.365	0.084	4.06465e-105	Chol
Ano6	8.38476e-109	0.393964	0.299	0.061	2.60372e-104	Chol
Elovl7	8.93622e-109	0.453971	0.344	0.087	2.77496e-104	Chol
Anxa4	4.07048e-107	1.2203	0.673	0.413	1.26401e-102	Chol
Slc44a3	2.41166e-105	0.505049	0.309	0.074	7.48892e-101	Chol
Fundc2	3.38915e-105	0.566635	0.464	0.153	1.05243e-100	Chol
Tuft1	3.80785e-105	0.415623	0.255	0.051	1.18245e-100	Chol
Tead1	5.96601e-105	0.551114	0.263	0.051	1.85262e-100	Chol
Onecut2	8.50351e-105	0.731354	0.345	0.089	2.6406e-100	Chol
Magi1	4.5538e-104	0.497951	0.302	0.069	1.41409e-99	Chol
Map3k1	6.67353e-103	0.637266	0.266	0.054	2.07233e-98	Chol
Spint2	3.36065e-102	0.954225	0.694	0.416	1.04358e-97	Chol
Gipc2	3.97822e-101	0.396557	0.268	0.058	1.23536e-96	Chol
Tshz2	1.25657e-100	0.422547	0.273	0.057	3.90203e-96	Chol
Hcfc1r1	1.37525e-100	0.805382	0.559	0.246	4.27057e-96	Chol
Tm4sf4	1.73372e-100	1.21973	0.761	0.577	5.38371e-96	Chol
Pebp1	2.58477e-99	0.969401	0.725	0.472	8.02649e-95	Chol
Add1	4.13363e-99	0.476798	0.36	0.095	1.28361e-94	Chol
Id1	4.09717e-98	0.759586	0.484	0.17	1.27229e-93	Chol
Birc2	1.26115e-97	0.557408	0.331	0.084	3.91624e-93	Chol
Syne2	1.98571e-97	0.609523	0.272	0.059	6.16624e-93	Chol
Lims1	1.35396e-96	0.639581	0.513	0.201	4.20446e-92	Chol
Pnrc1	1.58944e-96	1.01888	0.763	0.546	4.9357e-92	Chol
Lpp	2.39368e-96	0.607549	0.487	0.168	7.4331e-92	Chol
Malat1	2.7234e-96	0.697003	0.998	0.702	8.45698e-92	Chol
Pkn2	1.25621e-94	0.644089	0.689	0.344	3.90091e-90	Chol
Vcam1	2.12737e-94	0.555436	0.453	0.147	6.60611e-90	Chol
Nfkbia	3.41821e-94	0.811135	0.608	0.279	1.06146e-89	Chol
Ccdc34	3.77195e-94	0.542048	0.453	0.15	1.1713e-89	Chol
Pik3ap1	5.0444e-94	0.369089	0.275	0.065	1.56644e-89	Chol
Tcf3	3.59755e-93	0.332488	0.293	0.07	1.11715e-88	Chol
Ttc3	6.60689e-93	0.514834	0.399	0.12	2.05164e-88	Chol
H2-K1	1.14315e-92	0.636337	0.928	0.716	3.54981e-88	Chol
Dstn	1.58775e-92	0.724163	0.811	0.57	4.93044e-88	Chol
Myl12b	2.0578e-92	1.29814	0.752	0.57	6.39007e-88	Chol
Tfdp2	1.79167e-91	0.459783	0.315	0.084	5.56368e-87	Chol
Shisa5	7.76964e-91	0.657519	0.495	0.198	2.41271e-86	Chol
Nudt19	9.61708e-91	1.18795	0.597	0.327	2.98639e-86	Chol
S100a16	8.34844e-90	0.658379	0.601	0.292	2.59244e-85	Chol
Mfge8	3.37603e-89	0.796292	0.57	0.258	1.04836e-84	Chol
Cadm1	1.39083e-88	0.562887	0.371	0.113	4.31895e-84	Chol
Ywhaz	1.90208e-88	0.76466	0.748	0.496	5.90653e-84	Chol
Hes1	6.99196e-88	0.943036	0.664	0.341	2.17121e-83	Chol
Cdk4	7.66121e-88	0.688817	0.541	0.249	2.37904e-83	Chol
Zfp664	4.43319e-86	0.472763	0.356	0.106	1.37664e-81	Chol
Palmd	8.82572e-85	0.810413	0.527	0.243	2.74065e-80	Chol
Myl6	1.66153e-84	0.525753	0.923	0.787	5.15955e-80	Chol
Ccnd2	2.94886e-84	0.295202	0.302	0.071	9.15709e-80	Chol
Ilf2	3.30029e-84	0.465695	0.372	0.118	1.02484e-79	Chol
Selenom	3.79893e-84	0.549422	0.442	0.163	1.17968e-79	Chol
Hmgn1	3.98259e-84	0.84349	0.741	0.531	1.23671e-79	Chol
Hnrnph3	6.7507e-84	0.373633	0.318	0.087	2.09629e-79	Chol
Tspan7	2.89607e-83	0.361184	0.462	0.168	8.99318e-79	Chol
Rcn2	1.01237e-82	0.404603	0.365	0.116	3.14373e-78	Chol
Tpr	8.9436e-82	0.599886	0.723	0.424	2.77726e-77	Chol
Stt3b	5.53955e-81	0.733951	0.532	0.249	1.7202e-76	Chol
Kmt2e	2.30122e-80	0.527658	0.505	0.213	7.14598e-76	Chol
Cxadr	3.4303e-80	0.779657	0.646	0.376	1.06521e-75	Chol
Srrm2	7.73724e-80	0.575861	0.77	0.484	2.40265e-75	Chol
Pnn	8.91664e-80	0.478735	0.419	0.15	2.76888e-75	Chol
Prmt1	1.17207e-79	0.608568	0.437	0.175	3.63963e-75	Chol
Txnip	3.65013e-79	0.539043	0.619	0.287	1.13347e-74	Chol
Stmn1	7.04362e-79	0.558381	0.363	0.113	2.18725e-74	Chol
Pold3	4.21283e-78	0.329232	0.275	0.072	1.30821e-73	Chol
Alcam	8.0003e-78	0.827224	0.655	0.364	2.48433e-73	Chol
Arl6ip1	8.64774e-78	0.755892	0.692	0.428	2.68538e-73	Chol
Il10rb	1.49409e-77	0.3114	0.288	0.078	4.63961e-73	Chol
Msi2	2.32533e-77	0.600582	0.353	0.11	7.22086e-73	Chol
Dsp	5.88248e-77	0.558686	0.304	0.088	1.82669e-72	Chol
Maf1	2.84635e-76	0.359939	0.326	0.1	8.83876e-72	Chol
Actb	4.06825e-76	0.490978	0.942	0.873	1.26331e-71	Chol
2010111I01Rik	1.89619e-75	0.493101	0.41	0.154	5.88825e-71	Chol
Hmgb2	3.7171e-75	0.427266	0.39	0.126	1.15427e-70	Chol
Myl12a	4.08934e-75	0.992488	0.714	0.531	1.26986e-70	Chol
Aplp2	3.49588e-74	0.75054	0.71	0.397	1.08558e-69	Chol
Khdrbs1	5.76508e-74	0.453871	0.432	0.165	1.79023e-69	Chol
Hmgb1	6.02026e-74	0.631349	0.811	0.629	1.86947e-69	Chol
Dusp1	1.05745e-73	0.760428	0.561	0.264	3.28371e-69	Chol
Slc43a2	1.87027e-73	0.30391	0.27	0.066	5.80775e-69	Chol
Ctnna1	2.18054e-73	0.543863	0.576	0.286	6.77124e-69	Chol
Nenf	3.60625e-72	0.646503	0.662	0.41	1.11985e-67	Chol
Ces1d	4.42041e-72	0.966202	0.46	0.206	1.37267e-67	Chol
Capns1	8.24289e-72	0.83206	0.638	0.416	2.55966e-67	Chol
Dock7	1.90986e-71	0.360971	0.255	0.067	5.93068e-67	Chol
Hnrnpk	5.83179e-71	0.600323	0.781	0.587	1.81094e-66	Chol
Ctnnb1	6.38378e-71	0.671426	0.603	0.314	1.98235e-66	Chol
Ddx39b	3.22008e-70	0.580346	0.601	0.33	9.99933e-66	Chol
Ptov1	3.42071e-70	0.571441	0.469	0.214	1.06223e-65	Chol
Cyb561	1.00161e-69	0.407134	0.295	0.091	3.11029e-65	Chol
Laptm4b	2.90525e-69	0.623388	0.457	0.212	9.02166e-65	Chol
Me1	3.49379e-69	0.486411	0.374	0.137	1.08493e-64	Chol
Pawr	4.68496e-69	0.414827	0.315	0.103	1.45482e-64	Chol
Glul	2.16623e-68	0.276749	0.281	0.077	6.72679e-64	Chol
Fnbp1l	2.42164e-68	0.573594	0.493	0.216	7.51993e-64	Chol
Ktn1	3.22079e-68	0.550804	0.469	0.185	1.00015e-63	Chol
Ywhaq	4.02208e-68	0.838826	0.644	0.441	1.24898e-63	Chol
Cdkn1b	4.60372e-68	0.355656	0.327	0.104	1.42959e-63	Chol
Itgav	1.29798e-67	0.409948	0.268	0.076	4.03063e-63	Chol
Sptssa	1.32654e-67	0.771375	0.646	0.439	4.1193e-63	Chol
Npm1	1.42996e-67	0.598441	0.75	0.524	4.44045e-63	Chol
Ywhae	3.2795e-67	0.567199	0.788	0.591	1.01838e-62	Chol
Akap9	4.46798e-67	0.525445	0.428	0.179	1.38744e-62	Chol
Itm2c	8.34117e-67	0.495695	0.723	0.465	2.59018e-62	Chol
Leprot	8.79313e-67	0.364016	0.403	0.156	2.73053e-62	Chol
Aldoa	1.00361e-66	1.00484	0.621	0.417	3.11651e-62	Chol
Ddx5	1.60735e-66	0.565867	0.764	0.514	4.9913e-62	Chol
Gadd45b	2.267e-66	0.428775	0.297	0.091	7.03971e-62	Chol
Hnrnpa3	2.29759e-66	0.574074	0.818	0.635	7.13471e-62	Chol
Bckdk	2.72573e-66	0.364881	0.299	0.094	8.46421e-62	Chol
Ywhah	5.43838e-66	0.649175	0.655	0.417	1.68878e-61	Chol
Pdgfa	6.4043e-66	0.550861	0.376	0.147	1.98873e-61	Chol
Ocln	4.46092e-65	0.342122	0.257	0.074	1.38525e-60	Chol
Tia1	5.12785e-65	0.324801	0.275	0.079	1.59235e-60	Chol
Cbx5	5.77198e-65	0.592493	0.423	0.176	1.79237e-60	Chol
Hnrnpa1	8.11446e-65	0.658303	0.547	0.305	2.51978e-60	Chol
Smim22	9.19282e-65	0.686993	0.509	0.239	2.85465e-60	Chol
Rhoa	1.02263e-64	0.645604	0.705	0.508	3.17556e-60	Chol
Dnajc1	2.14457e-64	0.645498	0.531	0.27	6.65954e-60	Chol
Gmds	2.83406e-64	0.324421	0.266	0.08	8.80062e-60	Chol
Cldn3	2.84847e-64	0.892146	0.651	0.454	8.84535e-60	Chol
Pak2	3.13579e-64	0.539297	0.561	0.289	9.73756e-60	Chol
Cdh1	4.63483e-64	0.86805	0.448	0.2	1.43925e-59	Chol
Tra2a	4.64375e-64	0.479217	0.39	0.143	1.44202e-59	Chol
Fos	5.71318e-64	0.766986	0.772	0.479	1.77411e-59	Chol
Gm42031	5.91485e-64	0.55716	0.387	0.157	1.83674e-59	Chol
Sgk1	6.65015e-64	0.355154	0.378	0.129	2.06507e-59	Chol
Rbm39	9.87679e-64	0.56803	0.763	0.493	3.06704e-59	Chol
H2-D1	1.81222e-63	0.568139	0.845	0.664	5.62748e-59	Chol
Atp1a1	2.01241e-63	0.643718	0.61	0.35	6.24913e-59	Chol
Ahnak	2.58896e-63	0.571473	0.304	0.095	8.03951e-59	Chol
Tgif1	3.41456e-63	0.552129	0.424	0.184	1.06032e-58	Chol
Ypel2	5.16691e-63	0.441534	0.288	0.09	1.60448e-58	Chol
Matr3	2.68471e-62	0.51168	0.489	0.234	8.33684e-58	Chol
Dpp8	3.27204e-62	0.324183	0.302	0.094	1.01607e-57	Chol
Ncl	3.73058e-62	0.528635	0.685	0.394	1.15846e-57	Chol
Pafah1b1	4.37598e-62	0.515898	0.716	0.441	1.35887e-57	Chol
Taf1d	4.59558e-62	0.583442	0.403	0.155	1.42706e-57	Chol
2210016L21Rik	1.3405e-61	0.315792	0.295	0.096	4.16265e-57	Chol
Atpif1	2.57191e-61	0.480315	0.862	0.671	7.98654e-57	Chol
Hmgb3	2.8628e-61	0.457455	0.369	0.145	8.88985e-57	Chol
Fosb	3.56026e-61	0.783118	0.408	0.163	1.10557e-56	Chol
Nipsnap2	5.00164e-61	0.272188	0.261	0.077	1.55316e-56	Chol
Csnk1a1	1.03322e-60	0.570001	0.68	0.406	3.20847e-56	Chol
Fbxl5	1.47638e-60	0.416187	0.349	0.131	4.5846e-56	Chol
Id2	2.42751e-60	0.633768	0.721	0.506	7.53815e-56	Chol
Aff4	3.72154e-60	0.514698	0.451	0.203	1.15565e-55	Chol
Tagln2	5.52224e-60	0.927907	0.651	0.474	1.71482e-55	Chol
Lrrc42	6.62196e-60	0.414755	0.345	0.131	2.05632e-55	Chol
Rtn4	7.1078e-60	0.668218	0.633	0.406	2.20719e-55	Chol
Fus	8.67225e-60	0.504376	0.68	0.386	2.69299e-55	Chol
Slc6a6	1.31065e-59	0.61733	0.466	0.217	4.06997e-55	Chol
Sumo2	1.7046e-59	0.728718	0.674	0.495	5.29329e-55	Chol
H2afv	3.02006e-59	0.753715	0.629	0.423	9.37819e-55	Chol
Gnb2	4.56816e-59	0.605117	0.709	0.523	1.41855e-54	Chol
Arid4b	8.99425e-59	0.421994	0.345	0.126	2.79298e-54	Chol
Serpinb6a	1.44893e-58	0.443703	0.55	0.285	4.49935e-54	Chol
Srek1	2.62483e-58	0.344375	0.441	0.186	8.15089e-54	Chol
Hnrnpab	4.43658e-58	0.597307	0.709	0.492	1.37769e-53	Chol
Lrrfip1	9.01236e-58	0.476132	0.385	0.163	2.79861e-53	Chol
Map1lc3a	2.90856e-57	0.622175	0.536	0.305	9.03195e-53	Chol
Srsf3	3.04433e-57	0.500395	0.577	0.324	9.45357e-53	Chol
Tns1	4.2089e-57	0.634287	0.426	0.184	1.30699e-52	Chol
Nfkbiz	1.15184e-56	0.488202	0.261	0.078	3.57681e-52	Chol
[truncated: 2,064 more rows]
