# Supplementary material for: Lineage tracing and single-cell analysis reveal proliferative Prom1+ tumour-propagating cells and their dynamic cellular transition during liver cancer progression
Source: HighWire-hosted journal article supplement (doi:10.1136/gutjnl-2021-324321), 2021-09-29
Supplement: gutjnl-2021-324321supp004_data_supplement.xlsx [file gutjnl-2021-324321supp004_data_supplement.xlsx]

## Sheet: HCC.final.SCT.cluster_Pos_min.p
	p_val	avg_logFC	pct.1	pct.2	p_val_adj	cluster	gene
Malat1	0	1.33639	0.934	0.823	0	0	Malat1
Fos	0	0.948089	0.734	0.53	0	0	Fos
mt-Nd4l	0	0.947072	0.996	0.955	0	0	mt-Nd4l
mt-Cytb	0	0.941961	0.998	0.977	0	0	mt-Cytb
Clu	0	0.849916	1	0.999	0	0	Clu
Ier2	0	0.799838	0.855	0.743	0	0	Ier2
Trf	0	0.771918	1	0.991	0	0	Trf
Pzp	0	0.753155	0.994	0.963	0	0	Pzp
Jun	0	0.728103	0.67	0.42	0	0	Jun
Zfp36	0	0.703087	0.797	0.649	0	0	Zfp36
Apoe	0	0.678831	1	1	0	0	Apoe
mt-Nd1	0	0.660749	0.988	0.941	0	0	mt-Nd1
F2	0	0.659153	1	0.99	0	0	F2
C3	0	0.656908	0.981	0.931	0	0	C3
mt-Nd4	0	0.646492	0.976	0.909	0	0	mt-Nd4
mt-Nd5	0	0.635909	0.961	0.864	0	0	mt-Nd5
mt-Nd2	0	0.611842	0.986	0.936	0	0	mt-Nd2
Cd81	0	0.606566	0.997	0.991	0	0	Cd81
Mug1	0	0.597028	0.916	0.86	0	0	Mug1
Cps1	0	0.595565	0.804	0.549	0	0	Cps1
Junb	0	0.58726	0.826	0.779	0	0	Junb
Hsd17b13	0	0.581305	0.958	0.833	0	0	Hsd17b13
Hp	0	0.578807	1	0.997	0	0	Hp
Herpud1	0	0.578571	0.913	0.853	0	0	Herpud1
Fn1	0	0.572567	0.882	0.584	0	0	Fn1
mt-Atp8	0	0.567157	0.988	0.939	0	0	mt-Atp8
H2-Q10	0	0.556955	1	0.998	0	0	H2-Q10
Serpinf2	0	0.555228	0.999	0.986	0	0	Serpinf2
Hpx	0	0.552201	1	1	0	0	Hpx
Serpina1c	0	0.544516	0.964	0.928	0	0	Serpina1c
Lrg1	0	0.54438	0.995	0.981	0	0	Lrg1
Serpind1	0	0.522832	0.993	0.964	0	0	Serpind1
Apob	0	0.522098	0.954	0.859	0	0	Apob
Igfbp1	0	0.508665	0.997	0.996	0	0	Igfbp1
Serpina1a	0	0.496898	0.997	0.987	0	0	Serpina1a
Cp	0	0.492586	0.947	0.874	0	0	Cp
Kng1	0	0.482352	1	1	0	0	Kng1
Acsl5	0	0.482294	0.971	0.928	0	0	Acsl5
Fga	0	0.481804	1	0.998	0	0	Fga
Efna1	0	0.481227	0.79	0.613	0	0	Efna1
Cfb	0	0.479987	0.975	0.943	0	0	Cfb
Cfi	0	0.476706	1	0.998	0	0	Cfi
Hal	0	0.461004	0.758	0.541	0	0	Hal
Hrg	0	0.458409	0.992	0.987	0	0	Hrg
Ahsg	0	0.458409	1	1	0	0	Ahsg
Proc	0	0.457553	0.982	0.914	0	0	Proc
Vtn	0	0.447084	0.997	0.985	0	0	Vtn
Scarb1	0	0.440608	0.872	0.634	0	0	Scarb1
Hgfac	0	0.422238	0.896	0.632	0	0	Hgfac
H2-K1	0	0.415769	0.992	0.97	0	0	H2-K1
Mug2	0	0.411729	0.64	0.357	0	0	Mug2
Fgb	0	0.410909	1	1	0	0	Fgb
mt-Co1	0	0.410065	0.999	0.994	0	0	mt-Co1
Txnip	0	0.403476	0.333	0.092	0	0	Txnip
Neat1	0	0.401024	0.452	0.123	0	0	Neat1
Cyp2d26	0	0.400664	0.959	0.924	0	0	Cyp2d26
Oaf	0	0.400046	0.868	0.659	0	0	Oaf
Ces2e	0	0.394126	0.948	0.865	0	0	Ces2e
Hes1	0	0.385651	0.435	0.106	0	0	Hes1
Itih1	0	0.380513	0.789	0.552	0	0	Itih1
F12	0	0.376155	0.826	0.588	0	0	F12
Cfh	0	0.375208	0.795	0.607	0	0	Cfh
Pglyrp2	0	0.374405	0.783	0.534	0	0	Pglyrp2
Tmem176b	0	0.373785	1	0.999	0	0	Tmem176b
Fdps	0	0.373759	0.992	0.99	0	0	Fdps
Kng2	0	0.369056	0.994	0.986	0	0	Kng2
Plg	0	0.368609	0.972	0.928	0	0	Plg
Slc38a2	0	0.36808	0.425	0.101	0	0	Slc38a2
Serpinc1	0	0.365211	1	0.998	0	0	Serpinc1
Rrbp1	0	0.362984	0.963	0.946	0	0	Rrbp1
Rgs16	0	0.349705	0.401	0.118	0	0	Rgs16
Apof	0	0.349482	0.989	0.985	0	0	Apof
Tmem176a	0	0.348902	0.991	0.973	0	0	Tmem176a
Hpn	0	0.339491	0.91	0.766	0	0	Hpn
Gc	0	0.333811	1	1	0	0	Gc
Col18a1	0	0.326604	0.434	0.106	0	0	Col18a1
Rdh16f2	0	0.321842	0.971	0.938	0	0	Rdh16f2
Dusp1	0	0.318726	0.315	0.083	0	0	Dusp1
Mvk	0	0.313864	0.572	0.276	0	0	Mvk
Klf6	0	0.311088	0.283	0.063	0	0	Klf6
Tmbim6	0	0.298541	1	0.999	0	0	Tmbim6
Nid1	0	0.29675	0.412	0.098	0	0	Nid1
Cfhr2	0	0.288701	0.979	0.956	0	0	Cfhr2
Slc25a25	0	0.286185	0.409	0.122	0	0	Slc25a25
Hmgcr	0	0.277042	0.409	0.129	0	0	Hmgcr
Atp1a1	0	0.270785	0.392	0.122	0	0	Atp1a1
P2rx4	0	0.265546	0.449	0.165	0	0	P2rx4
Bhlhe40	0	0.26302	0.422	0.147	0	0	Bhlhe40
Acsl3	0	0.261113	0.468	0.173	0	0	Acsl3
Cpq	0	0.256412	0.455	0.162	0	0	Cpq
Retreg1	0	0.255494	0.432	0.148	0	0	Retreg1
Pcsk9	0	0.240022	0.364	0.105	0	0	Pcsk9
Enpp2	0	0.239778	0.443	0.155	0	0	Enpp2
Son	0	0.23872	0.379	0.115	0	0	Son
F7	0	0.235894	0.418	0.152	0	0	F7
P4hb	0	0.231251	0.999	0.999	0	0	P4hb
Nipal1	0	0.229094	0.321	0.077	0	0	Nipal1
Golgb1	0	0.221518	0.388	0.128	0	0	Golgb1
Slc7a2	0	0.208265	0.287	0.07	0	0	Slc7a2
Sdc1	1.18862e-307	0.238536	0.432	0.161	1.6989e-303	0	Sdc1
Alcam	4.2736e-307	0.23768	0.426	0.158	6.10826e-303	0	Alcam
H2-T23	4.0423e-306	0.334619	0.814	0.594	5.77765e-302	0	H2-T23
2001-03-01	7.53501e-306	0.34564	0.785	0.57	1.07698e-301	0	2001-03-01
Fst	2.20509e-304	0.287867	0.428	0.163	3.15174e-300	0	Fst
B4galnt1	8.5406e-304	0.229241	0.433	0.162	1.22071e-299	0	B4galnt1
Jund	1.76781e-303	0.351916	0.565	0.306	2.52673e-299	0	Jund
Scd2	8.3983e-302	0.228733	0.394	0.136	1.20037e-297	0	Scd2
Iqgap2	4.20146e-299	0.228982	0.417	0.152	6.00514e-295	0	Iqgap2
Aldh1b1	5.5848e-297	0.308461	0.422	0.158	7.98236e-293	0	Aldh1b1
Fasn	6.6666e-297	0.237652	0.325	0.097	9.52857e-293	0	Fasn
Tmprss6	2.1245e-293	0.214452	0.358	0.118	3.03654e-289	0	Tmprss6
Dhcr24	4.56395e-293	0.332939	0.74	0.515	6.52325e-289	0	Dhcr24
Slc2a2	8.61161e-292	0.239614	0.326	0.101	1.23086e-287	0	Slc2a2
1300017J02Rik	3.16974e-290	0.322299	0.876	0.645	4.53052e-286	0	1300017J02Rik
Egfr	1.83947e-284	0.257158	0.363	0.126	2.62915e-280	0	Egfr
Itih4	4.07224e-283	0.348194	0.9	0.813	5.82045e-279	0	Itih4
Lss	2.18963e-281	0.229674	0.366	0.128	3.12964e-277	0	Lss
Serpina3m	3.28934e-281	0.299967	0.995	0.992	4.70145e-277	0	Serpina3m
Tfr2	7.68225e-278	0.221968	0.362	0.126	1.09802e-273	0	Tfr2
Aplp2	3.14733e-276	0.207315	0.349	0.118	4.49847e-272	0	Aplp2
F10	9.64294e-275	0.31048	0.934	0.855	1.37827e-270	0	F10
Selenbp2	3.17188e-273	0.283045	0.255	0.064	4.53357e-269	0	Selenbp2
Ppp1r15a	4.97481e-273	0.231426	0.301	0.09	7.1105e-269	0	Ppp1r15a
Agxt	8.68698e-272	0.319208	0.853	0.719	1.24163e-267	0	Agxt
Errfi1	3.49339e-271	0.304818	0.945	0.93	4.9931e-267	0	Errfi1
Il11ra1	9.60991e-266	0.212241	0.369	0.135	1.37354e-261	0	Il11ra1
Serpina3k	1.37685e-265	0.351998	0.989	0.997	1.96793e-261	0	Serpina3k
Mvd	1.0352e-263	0.239291	0.456	0.199	1.47961e-259	0	Mvd
Tm4sf4	4.59789e-263	0.414941	0.949	0.941	6.57176e-259	0	Tm4sf4
Naxd	1.19464e-262	0.225202	0.5	0.231	1.7075e-258	0	Naxd
Rbm39	1.81143e-260	0.228274	0.483	0.214	2.58908e-256	0	Rbm39
Zfyve21	7.5828e-259	0.20331	0.405	0.159	1.08381e-254	0	Zfyve21
Gls2	7.79333e-259	0.291737	0.716	0.49	1.1139e-254	0	Gls2
Pigr	1.95766e-258	0.218712	0.296	0.09	2.79808e-254	0	Pigr
Gdf15	2.61696e-251	0.634815	0.598	0.42	3.74041e-247	0	Gdf15
Tpst2	2.09652e-250	0.244226	0.522	0.261	2.99656e-246	0	Tpst2
Ambp	1.59368e-245	0.257666	1	1	2.27784e-241	0	Ambp
Acly	4.80743e-244	0.234126	0.476	0.22	6.87126e-240	0	Acly
Cdkn2b	1.05313e-243	0.213139	0.374	0.143	1.50523e-239	0	Cdkn2b
Cyp2d10	3.40221e-243	0.279871	0.939	0.884	4.86278e-239	0	Cyp2d10
Grhpr	9.63677e-242	0.248036	0.967	0.937	1.37738e-237	0	Grhpr
Cyr61	4.03439e-241	0.224375	0.196	0.041	5.76636e-237	0	Cyr61
Fgg	2.82202e-239	0.339836	0.999	0.997	4.03351e-235	0	Fgg
Dhcr7	7.5756e-239	0.213892	0.425	0.183	1.08278e-234	0	Dhcr7
Serpine1	2.60259e-236	0.283933	0.197	0.043	3.71988e-232	0	Serpine1
Hsp90b1	4.28922e-236	0.226744	0.994	0.994	6.13058e-232	0	Hsp90b1
Glud1	2.08577e-235	0.255793	0.999	0.998	2.98119e-231	0	Glud1
Pck1	1.39696e-234	0.509523	0.847	0.882	1.99668e-230	0	Pck1
Cpn1	5.88225e-233	0.270123	0.75	0.55	8.4075e-229	0	Cpn1
Ifngr1	7.37121e-233	0.228807	0.461	0.216	1.05357e-228	0	Ifngr1
C1ra	8.75683e-232	0.212854	0.422	0.183	1.25161e-227	0	C1ra
Actb	2.05606e-230	0.246294	0.999	0.998	2.93872e-226	0	Actb
Cyc1	5.58765e-230	0.238747	0.949	0.914	7.98643e-226	0	Cyc1
Itm2b	2.04637e-229	0.232017	0.999	1	2.92488e-225	0	Itm2b
Itih2	1.44606e-227	0.256884	0.921	0.88	2.06686e-223	0	Itih2
Chka	6.40514e-226	0.341485	0.532	0.315	9.15487e-222	0	Chka
Slc27a5	1.83982e-225	0.294241	0.705	0.517	2.62965e-221	0	Slc27a5
Mid1ip1	3.77815e-225	0.236603	0.354	0.139	5.40011e-221	0	Mid1ip1
Pdia6	8.25273e-225	0.237028	0.992	0.989	1.17956e-220	0	Pdia6
Cldn3	2.1633e-223	0.264157	0.886	0.796	3.09201e-219	0	Cldn3
mt-Atp6	2.25161e-223	0.331243	0.975	0.936	3.21822e-219	0	mt-Atp6
Apoh	6.80375e-223	0.220259	1	0.998	9.7246e-219	0	Apoh
Apoa5	1.01931e-221	0.229199	0.407	0.176	1.4569e-217	0	Apoa5
Tm7sf2	1.14742e-221	0.253081	0.616	0.351	1.64001e-217	0	Tm7sf2
Tpr	8.58964e-221	0.201905	0.459	0.211	1.22772e-216	0	Tpr
Selenbp1	3.75823e-220	0.291792	0.918	0.841	5.37163e-216	0	Selenbp1
Sc5d	8.24682e-220	0.26687	0.977	0.974	1.17872e-215	0	Sc5d
Amdhd1	4.12483e-219	0.23853	0.811	0.606	5.89562e-215	0	Amdhd1
Aqp8	4.57702e-219	0.440386	0.694	0.503	6.54193e-215	0	Aqp8
Uroc1	3.88625e-218	0.211357	0.524	0.265	5.55462e-214	0	Uroc1
Osgin1	4.636e-218	0.210621	0.371	0.149	6.62623e-214	0	Osgin1
Atp5a1	6.39618e-216	0.22989	0.893	0.757	9.14206e-212	0	Atp5a1
Atp1b1	1.23803e-214	0.203599	0.492	0.244	1.76952e-210	0	Atp1b1
Itih3	4.79231e-214	0.323367	0.879	0.768	6.84965e-210	0	Itih3
C4b	7.9613e-214	0.27496	0.552	0.328	1.13791e-209	0	C4b
8430408G22Rik	1.33343e-211	0.377012	0.875	0.831	1.90587e-207	0	8430408G22Rik
G6pc	3.82415e-211	0.265186	0.392	0.175	5.46585e-207	0	G6pc
Sds	4.3128e-211	0.226204	0.311	0.115	6.16429e-207	0	Sds
Afm	6.00349e-210	0.280678	0.811	0.623	8.58079e-206	0	Afm
Degs1	2.27952e-208	0.224419	0.526	0.28	3.25811e-204	0	Degs1
Ces1c	2.09242e-206	0.320142	0.833	0.629	2.9907e-202	0	Ces1c
Ddit4	2.87253e-203	0.345635	0.342	0.142	4.1057e-199	0	Ddit4
Gm4788	7.83388e-203	0.241573	0.598	0.377	1.1197e-198	0	Gm4788
Azgp1	5.42895e-202	0.221229	0.999	0.998	7.7596e-198	0	Azgp1
Serpina1d	7.60643e-202	0.239539	1	1	1.08719e-197	0	Serpina1d
Ftcd	1.52861e-200	0.253722	0.669	0.47	2.18484e-196	0	Ftcd
Btg2	1.23415e-198	0.29728	0.458	0.25	1.76397e-194	0	Btg2
F11	6.26756e-198	0.209239	0.491	0.254	8.95822e-194	0	F11
Slc38a3	1.54863e-196	0.265686	0.836	0.682	2.21346e-192	0	Slc38a3
Serpinf1	3.82525e-196	0.267891	0.906	0.894	5.46742e-192	0	Serpinf1
Egr1	8.43298e-195	0.374364	0.526	0.323	1.20533e-190	0	Egr1
Ier3	3.91278e-194	0.373255	0.354	0.155	5.59253e-190	0	Ier3
Cd151	2.39815e-192	0.20136	0.47	0.241	3.42768e-188	0	Cd151
Hilpda	9.96568e-192	0.236148	0.277	0.101	1.4244e-187	0	Hilpda
Slc37a4	2.94578e-191	0.254028	0.548	0.325	4.2104e-187	0	Slc37a4
Agt	2.47066e-190	0.20053	0.947	0.93	3.53132e-186	0	Agt
F5	1.57103e-189	0.217225	0.524	0.299	2.24548e-185	0	F5
Cxadr	4.20839e-182	0.234611	0.56	0.338	6.01505e-178	0	Cxadr
Hc	8.64539e-182	0.266606	0.577	0.383	1.23569e-177	0	Hc
Ass1	1.1581e-181	0.210777	0.999	0.994	1.65527e-177	0	Ass1
Rdh7	1.46685e-180	0.266409	0.891	0.835	2.09656e-176	0	Rdh7
Slc38a4	4.14417e-180	0.268501	0.757	0.6	5.92326e-176	0	Slc38a4
Cd9	2.69879e-176	0.281651	0.918	0.915	3.85738e-172	0	Cd9
H2-D1	1.38661e-175	0.24588	0.932	0.927	1.98188e-171	0	H2-D1
Cyp2a4	3.63388e-174	0.425658	0.884	0.943	5.1939e-170	0	Cyp2a4
Got1	9.37306e-173	0.298912	0.794	0.64	1.33969e-168	0	Got1
Akr7a5	1.63445e-172	0.211753	0.908	0.799	2.33612e-168	0	Akr7a5
Sephs2	2.75698e-172	0.232026	0.935	0.906	3.94056e-168	0	Sephs2
Qprt	1.50776e-171	0.224197	0.856	0.663	2.15505e-167	0	Qprt
Acss2	1.94309e-171	0.241315	0.483	0.27	2.77726e-167	0	Acss2
Ugt2b5	2.21216e-171	0.2326	0.869	0.763	3.16184e-167	0	Ugt2b5
Gadd45g	9.66265e-171	0.595432	0.55	0.396	1.38108e-166	0	Gadd45g
Slc25a47	1.37331e-168	0.396177	0.902	0.916	1.96287e-164	0	Slc25a47
Lbp	1.71813e-165	0.249077	0.493	0.284	2.45572e-161	0	Lbp
Rdh5	2.97108e-164	0.223846	0.551	0.347	4.24656e-160	0	Rdh5
Lifr	4.0887e-164	0.285874	0.491	0.288	5.84399e-160	0	Lifr
Gamt	4.70619e-164	0.212379	0.971	0.948	6.72656e-160	0	Gamt
C1s1	1.756e-162	0.230384	0.583	0.395	2.50985e-158	0	C1s1
Agpat2	1.83985e-162	0.253289	0.894	0.841	2.6297e-158	0	Agpat2
Echdc3	2.1677e-162	0.205773	0.749	0.575	3.09829e-158	0	Echdc3
Bsg	6.14873e-162	0.259086	0.999	1	8.78838e-158	0	Bsg
Cbs	6.5232e-162	0.221385	0.713	0.547	9.32361e-158	0	Cbs
Aadac	1.0631e-160	0.249725	0.864	0.733	1.51949e-156	0	Aadac
Srrm2	6.39606e-160	0.212924	0.588	0.393	9.14189e-156	0	Srrm2
Dgat2	4.2611e-159	0.233587	0.759	0.607	6.09039e-155	0	Dgat2
Slc39a4	7.87399e-159	0.213307	0.494	0.285	1.12543e-154	0	Slc39a4
Bex1	9.36033e-158	0.25158	0.288	0.121	1.33787e-153	0	Bex1
Nr0b2	5.74634e-155	0.26473	0.642	0.478	8.21324e-151	0	Nr0b2
Zfp36l1	1.08125e-154	0.293406	0.707	0.558	1.54543e-150	0	Zfp36l1
Rdh11	8.24367e-153	0.308096	0.62	0.421	1.17827e-148	0	Rdh11
Ldha	1.7675e-150	0.215977	0.994	0.992	2.52629e-146	0	Ldha
Fads2	4.08163e-149	0.363849	0.699	0.572	5.83387e-145	0	Fads2
Acp5	1.04798e-148	0.201753	0.717	0.55	1.49788e-144	0	Acp5
Psap	4.8824e-147	0.217933	0.67	0.508	6.97841e-143	0	Psap
Cyp2d22	6.77502e-144	0.205166	0.574	0.394	9.68354e-140	0	Cyp2d22
Ctsb	2.01153e-141	0.228427	0.91	0.833	2.87508e-137	0	Ctsb
Sdc4	9.15212e-141	0.23453	0.748	0.603	1.30811e-136	0	Sdc4
AI182371	1.12071e-138	0.20338	0.867	0.759	1.60183e-134	0	AI182371
Tat	6.22986e-138	0.317874	0.882	0.936	8.90434e-134	0	Tat
Hsd17b2	8.34041e-138	0.312096	0.872	0.85	1.19209e-133	0	Hsd17b2
Tdo2	2.49516e-133	0.305831	0.942	0.964	3.56633e-129	0	Tdo2
Slc27a2	7.88422e-132	0.24351	0.865	0.733	1.12689e-127	0	Slc27a2
Atf3	3.64106e-130	0.90337	0.45	0.313	5.20417e-126	0	Atf3
Qsox1	1.35646e-129	0.220579	0.491	0.324	1.93879e-125	0	Qsox1
F11r	2.43832e-128	0.206371	0.641	0.484	3.48509e-124	0	F11r
Tmem54	1.85874e-127	0.209413	0.309	0.149	2.6567e-123	0	Tmem54
Cyp2c40	6.16914e-126	0.258178	0.319	0.156	8.81755e-122	0	Cyp2c40
Arg1	5.06417e-124	0.211931	0.894	0.847	7.23822e-120	0	Arg1
Ly6e	6.9599e-123	0.216823	0.983	0.981	9.94779e-119	0	Ly6e
Igfbp2	9.11316e-120	0.257331	0.807	0.686	1.30254e-115	0	Igfbp2
Vnn3	3.06675e-119	0.215527	0.471	0.293	4.38331e-115	0	Vnn3
Ifi27l2b	4.34336e-116	0.204666	0.975	0.981	6.20796e-112	0	Ifi27l2b
Cxcl1	1.1855e-111	0.593827	0.625	0.566	1.69443e-107	0	Cxcl1
Gm35696	2.87097e-111	0.216246	0.43	0.263	4.10348e-107	0	Gm35696
Ifrd1	2.97202e-111	0.273009	0.554	0.414	4.24791e-107	0	Ifrd1
Actg1	7.76619e-111	0.274203	0.931	0.966	1.11002e-106	0	Actg1
Cyp2c70	3.64555e-110	0.235464	0.982	0.991	5.21059e-106	0	Cyp2c70
Iigp1	4.61651e-110	0.211504	0.702	0.573	6.59838e-106	0	Iigp1
Mat1a	1.01697e-109	0.212352	0.449	0.282	1.45356e-105	0	Mat1a
Xbp1	1.2108e-107	0.205686	0.919	0.925	1.7306e-103	0	Xbp1
Pnrc1	4.39159e-107	0.253475	0.837	0.75	6.27689e-103	0	Pnrc1
Gm26917	8.01662e-101	0.219015	0.359	0.22	1.14581e-96	0	Gm26917
Ubc	4.12271e-92	0.214082	0.75	0.641	5.89259e-88	0	Ubc
Tspan8	5.70194e-91	0.438059	0.724	0.771	8.14978e-87	0	Tspan8
Apoa4	3.90123e-70	0.433629	0.785	0.849	5.57603e-66	0	Apoa4
Id3	9.72496e-64	0.234424	0.374	0.256	1.38999e-59	0	Id3
Scd1	6.96755e-62	0.333555	0.861	0.923	9.95872e-58	0	Scd1
mt-Co2	2.69302e-61	0.215321	0.998	0.991	3.84913e-57	0	mt-Co2
Cpe	1.18818e-59	0.235234	0.59	0.522	1.69826e-55	0	Cpe
Spp1	3.54662e-47	1.40497	0.214	0.344	5.06919e-43	0	Spp1
Cxcl13	5.10079e-47	0.455196	0.37	0.28	7.29055e-43	0	Cxcl13
Angptl8	2.49203e-30	0.485295	0.74	0.833	3.56186e-26	0	Angptl8
Nudt19	7.67816e-24	0.200718	0.471	0.397	1.09744e-19	0	Nudt19
Mup3	8.0978e-20	0.379891	0.694	0.642	1.15742e-15	0	Mup3
Mt2	4.76964e-17	0.202119	0.575	0.559	6.81725e-13	0	Mt2
Mup20	0.00909359	0.258039	0.888	0.952	1	0	Mup20
Gm42418	0	1.87951	1	0.999	0	1	Gm42418
Apoc1	0	0.688647	1	1	0	1	Apoc1
Gm10076	0	0.588012	1	0.988	0	1	Gm10076
Rps21	0	0.571455	0.994	0.787	0	1	Rps21
Atp5e	0	0.56693	1	0.958	0	1	Atp5e
Sec61g	0	0.562638	1	0.965	0	1	Sec61g
Rpl39	0	0.56006	0.997	0.836	0	1	Rpl39
Rps26	0	0.55789	0.999	0.955	0	1	Rps26
Tff3	0	0.552673	0.979	0.653	0	1	Tff3
Rps28	0	0.539554	0.975	0.697	0	1	Rps28
Rpl34	0	0.525993	0.999	0.927	0	1	Rpl34
Rpl32	0	0.524349	1	0.967	0	1	Rpl32
Rpl38	0	0.519968	0.999	0.908	0	1	Rpl38
Rps29	0	0.519234	0.965	0.664	0	1	Rps29
Usmg5	0	0.512156	0.994	0.812	0	1	Usmg5
Rpl37a	0	0.511675	0.993	0.822	0	1	Rpl37a
Rpl37	0	0.491819	1	0.997	0	1	Rpl37
Apoc4	0	0.491546	1	0.999	0	1	Apoc4
Rps17	0	0.478368	0.927	0.686	0	1	Rps17
Rps15a	0	0.472058	0.997	0.874	0	1	Rps15a
Uqcr10	0	0.467043	0.989	0.797	0	1	Uqcr10
Uqcrq	0	0.465816	1	0.994	0	1	Uqcrq
Atp5j2	0	0.46464	0.999	0.926	0	1	Atp5j2
Rpl36	0	0.459269	1	0.971	0	1	Rpl36
Rpl35	0	0.455413	1	0.964	0	1	Rpl35
Cox7b	0	0.44487	0.987	0.812	0	1	Cox7b
Cox6c	0	0.436833	0.999	0.962	0	1	Cox6c
Rpl27	0	0.408243	0.999	0.953	0	1	Rpl27
Rpl41	0	0.397166	0.998	0.925	0	1	Rpl41
Rps27l	0	0.391302	0.997	0.882	0	1	Rps27l
Atp5l	0	0.375446	0.999	0.947	0	1	Atp5l
Cox7a2	0	0.373206	0.996	0.921	0	1	Cox7a2
Nme2	0	0.363951	1	1	0	1	Nme2
Rps14	0	0.362496	0.999	0.936	0	1	Rps14
Uba52	0	0.356959	1	1	0	1	Uba52
Apoa2	0	0.354039	1	1	0	1	Apoa2
Uqcr11	0	0.346975	0.998	0.95	0	1	Uqcr11
Cox7c	0	0.345666	1	0.978	0	1	Cox7c
Atox1	0	0.327421	0.999	0.979	0	1	Atox1
mt-Co3	0	0.323003	1	0.985	0	1	mt-Co3
Rps24	0	0.314202	1	0.996	0	1	Rps24
Ttr	0	0.265353	1	1	0	1	Ttr
Rps23	1.26175e-306	0.364864	0.983	0.821	1.80342e-302	1	Rps23
Rps13	1.66259e-300	0.374516	0.991	0.871	2.37634e-296	1	Rps13
Ndufa2	1.25206e-291	0.351439	0.987	0.855	1.78956e-287	1	Ndufa2
Rps12	2.81398e-287	0.339086	0.966	0.764	4.02202e-283	1	Rps12
Atp5g1	1.00175e-286	0.313269	1	0.977	1.4318e-282	1	Atp5g1
Ndufa3	1.15494e-279	0.357756	0.971	0.759	1.65076e-275	1	Ndufa3
Rps20	1.17505e-279	0.302502	1	0.996	1.6795e-275	1	Rps20
Uqcrh	9.71427e-269	0.34588	0.997	0.932	1.38846e-264	1	Uqcrh
Rps5	5.56972e-266	0.308611	0.999	0.957	7.9608e-262	1	Rps5
Cox6b1	1.2476e-262	0.31347	0.999	0.949	1.7832e-258	1	Cox6b1
Sec61b	1.9e-260	0.282993	1	0.983	2.71567e-256	1	Sec61b
2010107E04Rik	5.26476e-260	0.365582	0.991	0.839	7.52492e-256	1	2010107E04Rik
Rpl22	3.48494e-259	0.331614	0.994	0.893	4.98102e-255	1	Rpl22
Ndufc1	1.32442e-253	0.332293	0.992	0.863	1.89299e-249	1	Ndufc1
Ndufa11	4.13129e-235	0.331154	0.982	0.839	5.90486e-231	1	Ndufa11
Ndufb9	5.57308e-235	0.326244	0.996	0.935	7.96561e-231	1	Ndufb9
Apoc3	1.57726e-234	0.261265	1	1	2.25438e-230	1	Apoc3
Ndufv3	1.37743e-228	0.342645	0.974	0.805	1.96876e-224	1	Ndufv3
Rps27a	2.27542e-228	0.272653	1	0.997	3.25226e-224	1	Rps27a
Rpl26	6.42104e-218	0.306608	0.997	0.924	9.17759e-214	1	Rpl26
Ndufa7	1.4573e-216	0.307529	0.998	0.95	2.08293e-212	1	Ndufa7
Rplp2	1.3571e-212	0.278945	0.999	0.96	1.93971e-208	1	Rplp2
Rpl10-ps3	5.05101e-209	0.298606	0.987	0.789	7.2194e-205	1	Rpl10-ps3
Tstd1	1.93907e-202	0.281176	1	0.973	2.77151e-198	1	Tstd1
Rpl22l1	8.99498e-194	0.294304	0.929	0.729	1.28565e-189	1	Rpl22l1
Ndufb4	5.56065e-190	0.31079	0.969	0.793	7.94784e-186	1	Ndufb4
AY036118	2.26595e-186	0.421623	0.515	0.314	3.23873e-182	1	AY036118
Mrpl52	3.01226e-183	0.280943	0.994	0.918	4.30542e-179	1	Mrpl52
Cox5b	6.43123e-182	0.250091	0.999	0.972	9.19215e-178	1	Cox5b
Gng5	8.5446e-177	0.253176	1	0.987	1.22128e-172	1	Gng5
Nop10	1.53152e-175	0.276811	0.928	0.73	2.18901e-171	1	Nop10
Rpl36a	2.61859e-173	0.268594	0.992	0.876	3.74276e-169	1	Rpl36a
Rpl13a	1.2458e-165	0.260488	0.95	0.788	1.78062e-161	1	Rpl13a
Polr2l	5.68248e-164	0.334861	0.696	0.561	8.12196e-160	1	Polr2l
Rps11	9.77773e-163	0.234729	0.999	0.974	1.39753e-158	1	Rps11
Rps7	7.5592e-158	0.221912	1	0.994	1.08044e-153	1	Rps7
Rps27	9.14058e-156	0.339189	0.585	0.436	1.30646e-151	1	Rps27
S100a10	4.86883e-152	0.202228	0.998	0.879	6.95902e-148	1	S100a10
Rps16	7.20041e-145	0.207829	1	0.999	1.02915e-140	1	Rps16
Rpl35a	1.79365e-141	0.298322	0.876	0.751	2.56367e-137	1	Rpl35a
Romo1	2.20886e-135	0.311596	0.723	0.603	3.15712e-131	1	Romo1
Atpif1	5.04449e-135	0.23838	0.912	0.705	7.21009e-131	1	Atpif1
Ndufa1	2.39692e-131	0.256097	0.982	0.842	3.42592e-127	1	Ndufa1
Ubl5	7.49374e-129	0.263694	0.948	0.784	1.07108e-124	1	Ubl5
Rps18	1.26455e-120	0.23026	0.99	0.885	1.80742e-116	1	Rps18
Rpl31	2.68498e-119	0.253679	0.866	0.724	3.83764e-115	1	Rpl31
Atp5h	6.20776e-112	0.223579	0.993	0.902	8.87275e-108	1	Atp5h
Urah	1.30899e-104	0.202358	0.987	0.86	1.87094e-100	1	Urah
Apom	4.66041e-98	0.220864	1	0.999	6.66112e-94	1	Apom
Tomm7	7.38387e-96	0.287664	0.686	0.604	1.05538e-91	1	Tomm7
Rps6	2.24406e-90	0.208829	0.987	0.898	3.20743e-86	1	Rps6
Dynll1	2.54201e-73	0.249527	0.703	0.626	3.6333e-69	1	Dynll1
Sem1	1.7475e-71	0.20341	0.981	0.871	2.4977e-67	1	Sem1
Ndufb2	8.95851e-62	0.243651	0.726	0.673	1.28044e-57	1	Ndufb2
Tmem256	4.54665e-53	0.208414	0.753	0.698	6.49853e-49	1	Tmem256
Uqcc2	3.36595e-52	0.229034	0.677	0.622	4.81095e-48	1	Uqcc2
Timm8b	2.30737e-47	0.218075	0.663	0.611	3.29792e-43	1	Timm8b
mt-Nd3	9.22623e-39	0.274469	0.228	0.176	1.31871e-34	1	mt-Nd3
Atp5k	1.34438e-20	0.239563	0.439	0.465	1.92152e-16	1	Atp5k
Gstm1	0	1.40936	0.991	0.923	0	2	Gstm1
Rida	0	0.682305	1	0.981	0	2	Rida
Mgst1	0	0.637185	1	0.999	0	2	Mgst1
Orm1	0	0.619754	0.983	0.856	0	2	Orm1
Bhmt	0	0.58225	0.941	0.803	0	2	Bhmt
Ass11	0	0.536436	1	0.994	0	2	Ass1
Cat	0	0.527822	0.949	0.9	0	2	Cat
Selenop	0	0.459579	1	1	0	2	Selenop
Gstt3	0	0.443978	0.799	0.555	0	2	Gstt3
Phyh	0	0.418996	0.995	0.98	0	2	Phyh
Gsta2	0	0.417001	0.226	0.033	0	2	Gsta2
Gnmt	0	0.411074	0.997	0.971	0	2	Gnmt
Scp2	0	0.38619	1	0.999	0	2	Scp2
Cyb5a	0	0.352114	1	1	0	2	Cyb5a
Cbr3	8.57833e-308	0.646652	0.267	0.062	1.2261e-303	2	Cbr3
Gapdh	2.80891e-302	0.383965	1	1	4.01477e-298	2	Gapdh
Cpb2	5.75188e-302	0.355462	0.991	0.963	8.22117e-298	2	Cpb2
Fth1	1.52724e-290	0.365055	1	1	2.18289e-286	2	Fth1
Serpina1d1	1.58362e-286	0.361705	1	1	2.26347e-282	2	Serpina1d
Gsta4	2.191e-279	0.533639	0.883	0.734	3.1316e-275	2	Gsta4
Pgrmc1	2.40144e-279	0.422872	0.945	0.901	3.43238e-275	2	Pgrmc1
Gpx1	3.68846e-277	0.494627	1	0.993	5.27192e-273	2	Gpx1
Fbp1	6.48834e-272	0.416013	0.976	0.92	9.27378e-268	2	Fbp1
Cyb5r3	2.73297e-264	0.424459	0.948	0.93	3.90624e-260	2	Cyb5r3
Ly6e1	3.28794e-258	0.375076	0.992	0.978	4.69945e-254	2	Ly6e
Cbr1	2.98648e-252	0.666139	0.88	0.823	4.26857e-248	2	Cbr1
Ftl1	1.32004e-247	0.648461	1	1	1.88673e-243	2	Ftl1
Selenow	8.78938e-244	0.399172	0.88	0.741	1.25627e-239	2	Selenow
Gstm3	3.68076e-237	1.73964	0.621	0.418	5.26091e-233	2	Gstm3
Sult1a1	4.29384e-237	0.347811	0.966	0.918	6.13719e-233	2	Sult1a1
Esd	4.77367e-235	0.551916	0.982	0.972	6.82301e-231	2	Esd
Reep6	1.00009e-234	0.356897	0.856	0.665	1.42943e-230	2	Reep6
Mrap	6.32086e-233	0.39514	0.653	0.38	9.03441e-229	2	Mrap
Prdx1	1.1377e-229	0.395744	1	1	1.62611e-225	2	Prdx1
Nqo1	1.3017e-225	0.596378	0.356	0.15	1.86052e-221	2	Nqo1
Gstm6	1.00266e-224	0.386235	0.754	0.564	1.43311e-220	2	Gstm6
Igf1	6.93033e-224	0.38882	0.824	0.582	9.90551e-220	2	Igf1
Prdx6	1.88487e-223	0.360479	0.991	0.983	2.69404e-219	2	Prdx6
Gsta3	3.26499e-220	0.455111	0.972	0.924	4.66665e-216	2	Gsta3
Ybx1	4.95612e-220	0.335277	0.963	0.919	7.08378e-216	2	Ybx1
Mup201	3.26064e-218	0.627864	0.982	0.915	4.66044e-214	2	Mup20
Psen2	1.96808e-217	0.388672	0.896	0.813	2.81298e-213	2	Psen2
Sqor	3.12033e-216	0.344124	0.854	0.666	4.45989e-212	2	Sqor
Cycs	5.3312e-216	0.288594	0.996	0.983	7.61989e-212	2	Cycs
Tdo21	2.26016e-215	0.389212	0.989	0.947	3.23045e-211	2	Tdo2
Ces1g	2.79764e-207	0.289591	0.222	0.061	3.99866e-203	2	Ces1g
Mup31	5.62562e-207	0.444527	0.855	0.601	8.04071e-203	2	Mup3
Cyp1a2	4.6045e-206	0.811451	0.546	0.311	6.58121e-202	2	Cyp1a2
Dap	3.77249e-203	0.320439	0.929	0.9	5.39202e-199	2	Dap
Uox	1.50226e-201	0.385892	0.998	0.986	2.14718e-197	2	Uox
Gm3776	1.15842e-199	0.228194	0.157	0.03	1.65572e-195	2	Gm3776
Hebp1	2.08406e-199	0.327845	0.916	0.832	2.97874e-195	2	Hebp1
Slc10a1	3.78091e-197	0.326236	0.75	0.536	5.40406e-193	2	Slc10a1
Tuba1c	5.66834e-197	0.370705	0.904	0.858	8.10175e-193	2	Tuba1c
Mdh1	2.4696e-196	0.270397	0.997	0.994	3.5298e-192	2	Mdh1
Serpina3k1	7.64747e-192	0.263473	1	0.993	1.09305e-187	2	Serpina3k
Gstm4	5.9624e-191	0.471133	0.51	0.296	8.52206e-187	2	Gstm4
Anp32a	2.94788e-190	0.339475	0.748	0.576	4.21341e-186	2	Anp32a
Ifitm3	2.83074e-189	0.273735	1	0.999	4.04597e-185	2	Ifitm3
Lgals9	3.75838e-187	0.305094	0.966	0.95	5.37186e-183	2	Lgals9
Mpc1	8.12422e-184	0.272264	0.999	0.995	1.16119e-179	2	Mpc1
Prdx5	2.82437e-182	0.278073	0.989	0.982	4.03687e-178	2	Prdx5
Cyp2f2	7.15434e-182	0.232524	0.159	0.034	1.02257e-177	2	Cyp2f2
Cyp2c701	1.71459e-181	0.295926	0.995	0.986	2.45066e-177	2	Cyp2c70
Etfa	6.32726e-181	0.28527	0.963	0.953	9.04355e-177	2	Etfa
Gpx4	2.55597e-178	0.313761	0.996	0.987	3.65325e-174	2	Gpx4
Cdo1	3.97258e-174	0.305928	0.917	0.858	5.678e-170	2	Cdo1
Hpd	8.4308e-173	0.308166	0.928	0.84	1.20501e-168	2	Hpd
Ttc36	1.45708e-171	0.250711	1	0.994	2.08261e-167	2	Ttc36
Hrg1	5.0054e-171	0.27758	0.999	0.985	7.15422e-167	2	Hrg
Akr1c18	1.70643e-170	0.289322	0.971	0.947	2.439e-166	2	Akr1c18
Haao	2.84098e-170	0.310929	0.89	0.771	4.06062e-166	2	Haao
Atp5c1	4.15203e-167	0.271968	0.989	0.978	5.93449e-163	2	Atp5c1
Serpina1e	2.09749e-166	0.519507	1	0.997	2.99794e-162	2	Serpina1e
Cyp2a12	2.73223e-166	0.304145	0.948	0.883	3.90518e-162	2	Cyp2a12
Eif5a	4.41927e-166	0.264764	0.993	0.996	6.31646e-162	2	Eif5a
Qdpr	7.07942e-165	0.291082	0.958	0.955	1.01186e-160	2	Qdpr
Tecr	5.25643e-164	0.28121	0.958	0.945	7.51302e-160	2	Tecr
Glyat	1.52172e-161	0.290516	0.795	0.613	2.17499e-157	2	Glyat
Akr1d1	2.08215e-161	0.2339	0.33	0.145	2.97602e-157	2	Akr1d1
Ccl9	4.59741e-160	0.283381	0.807	0.632	6.57107e-156	2	Ccl9
Serpina1b	3.10852e-159	0.274065	1	1	4.443e-155	2	Serpina1b
Arg11	4.93671e-159	0.306245	0.914	0.848	7.05605e-155	2	Arg1
Glo1	5.32456e-159	0.269461	0.843	0.676	7.6104e-155	2	Glo1
Lamp1	1.97546e-156	0.273482	0.967	0.967	2.82353e-152	2	Lamp1
Angptl3	7.54416e-156	0.321311	0.963	0.919	1.07829e-151	2	Angptl3
Bola3	1.15796e-154	0.261247	0.86	0.726	1.65508e-150	2	Bola3
Adh1	1.45889e-153	0.292937	0.991	0.978	2.08519e-149	2	Adh1
Nit2	1.14719e-152	0.287353	0.824	0.664	1.63968e-148	2	Nit2
Aldob	1.44516e-152	0.289155	0.996	0.991	2.06556e-148	2	Aldob
Adh5	7.88476e-152	0.271448	0.936	0.932	1.12697e-147	2	Adh5
Gchfr	4.32321e-151	0.248128	0.981	0.949	6.17916e-147	2	Gchfr
Cyp2j5	2.70121e-148	0.26071	0.398	0.201	3.86084e-144	2	Cyp2j5
Blvrb	5.64258e-147	0.535327	0.8	0.68	8.06495e-143	2	Blvrb
Ube2v1	4.85037e-146	0.286293	0.727	0.573	6.93263e-142	2	Ube2v1
Aldh1l1	2.40587e-145	0.33784	0.714	0.564	3.43871e-141	2	Aldh1l1
B2m	3.16863e-145	0.221308	1	0.998	4.52893e-141	2	B2m
Psme1	2.51098e-143	0.267284	0.823	0.654	3.58895e-139	2	Psme1
Fxyd1	7.97972e-143	0.264724	0.828	0.656	1.14054e-138	2	Fxyd1
Lcn2	2.22859e-141	0.368512	0.997	0.959	3.18533e-137	2	Lcn2
Ugp2	3.40592e-141	0.328086	0.898	0.846	4.86809e-137	2	Ugp2
Dstn	1.06764e-140	0.257665	0.817	0.653	1.52598e-136	2	Dstn
S100a101	4.40744e-140	0.279138	0.973	0.904	6.29955e-136	2	S100a10
Cd302	1.29823e-138	0.231592	0.991	0.984	1.85555e-134	2	Cd302
Alb	2.1504e-138	0.26202	1	1	3.07357e-134	2	Alb
Copz1	4.43352e-138	0.2649	0.796	0.648	6.33683e-134	2	Copz1
Thrsp	4.14799e-137	0.430972	0.391	0.211	5.92873e-133	2	Thrsp
Atp5g3	5.41154e-137	0.210664	1	1	7.73472e-133	2	Atp5g3
Cmbl	1.32909e-136	0.270636	0.684	0.516	1.89967e-132	2	Cmbl
Atp6v0c	6.59977e-136	0.234633	0.97	0.97	9.43306e-132	2	Atp6v0c
Asgr1	1.16537e-135	0.22838	0.99	0.974	1.66566e-131	2	Asgr1
Litaf	2.33274e-135	0.249972	0.765	0.608	3.33418e-131	2	Litaf
Mpc2	4.27986e-135	0.213054	0.995	0.969	6.1172e-131	2	Mpc2
Atp5f1	1.67193e-134	0.237402	0.98	0.975	2.38969e-130	2	Atp5f1
Comt	2.1744e-133	0.247864	0.973	0.958	3.10787e-129	2	Comt
Hibadh	9.55539e-133	0.262107	0.707	0.557	1.36575e-128	2	Hibadh
Gdi2	5.23206e-131	0.25706	0.822	0.68	7.47819e-127	2	Gdi2
Ndufv2	4.81746e-130	0.243165	0.829	0.679	6.88559e-126	2	Ndufv2
Serpina12	1.34068e-129	0.282211	0.958	0.894	1.91624e-125	2	Serpina12
Cdc42	2.43902e-129	0.2573	0.837	0.688	3.4861e-125	2	Cdc42
Adk	4.07509e-129	0.253601	0.911	0.9	5.82452e-125	2	Adk
Hspd1	7.34318e-129	0.248972	0.961	0.966	1.04956e-124	2	Hspd1
Cops6	7.77305e-129	0.246558	0.818	0.667	1.111e-124	2	Cops6
Vapa	2.40227e-127	0.257012	0.874	0.842	3.43357e-123	2	Vapa
Ywhae	4.30372e-127	0.258001	0.821	0.681	6.15131e-123	2	Ywhae
Uqcrfs1	3.067e-126	0.239288	0.975	0.978	4.38366e-122	2	Uqcrfs1
Hsd11b1	1.55961e-125	0.252757	0.851	0.664	2.22914e-121	2	Hsd11b1
Gstt1	1.91371e-125	0.236495	0.962	0.946	2.73527e-121	2	Gstt1
Ttpa	2.87604e-125	0.265684	0.619	0.461	4.11073e-121	2	Ttpa
Fah	5.69724e-124	0.241593	0.962	0.961	8.14307e-120	2	Fah
Bag1	1.06654e-123	0.260681	0.77	0.627	1.52441e-119	2	Bag1
Bnip3	3.49043e-121	0.250721	0.729	0.571	4.98886e-117	2	Bnip3
Rarres2	6.84747e-121	0.216844	0.984	0.947	9.78709e-117	2	Rarres2
Sumo2	6.56066e-119	0.253005	0.815	0.681	9.37715e-115	2	Sumo2
Car3	1.78895e-118	0.281931	0.284	0.13	2.55695e-114	2	Car3
Gstz1	6.3343e-118	0.224995	0.948	0.93	9.05361e-114	2	Gstz1
Sdhd	5.14449e-117	0.237049	0.817	0.673	7.35302e-113	2	Sdhd
Hadh	1.46714e-115	0.248328	0.781	0.642	2.09698e-111	2	Hadh
Decr2	7.8523e-115	0.216019	0.391	0.22	1.12233e-110	2	Decr2
Etfb	1.45883e-114	0.305245	0.833	0.691	2.0851e-110	2	Etfb
Tspan31	5.38562e-114	0.227643	0.8	0.65	7.69767e-110	2	Tspan31
Hal1	8.00724e-114	0.239538	0.745	0.574	1.14447e-109	2	Hal
Rarres1	1.03187e-113	0.229116	0.521	0.337	1.47485e-109	2	Rarres1
Azgp11	1.55724e-113	0.201294	1	0.998	2.22577e-109	2	Azgp1
Skp1a	2.59429e-113	0.219276	0.865	0.757	3.70802e-109	2	Skp1a
Myl12b	4.79534e-113	0.265876	0.927	0.892	6.85399e-109	2	Myl12b
Idi1	7.36671e-113	0.266291	0.828	0.775	1.05292e-108	2	Idi1
Taldo1	9.14486e-113	0.315189	0.777	0.672	1.30707e-108	2	Taldo1
Mrpl42	1.49563e-112	0.237659	0.809	0.661	2.13771e-108	2	Mrpl42
Aes	4.68867e-112	0.232645	0.928	0.924	6.70151e-108	2	Aes
Vdac1	1.17724e-111	0.23995	0.794	0.66	1.68263e-107	2	Vdac1
Cfhr21	1.09555e-109	0.212357	0.967	0.963	1.56587e-105	2	Cfhr2
Serping1	5.76714e-109	0.239045	0.963	0.937	8.24297e-105	2	Serping1
Akr1c6	7.45397e-108	0.292372	0.925	0.857	1.0654e-103	2	Akr1c6
Ap3s1	5.28997e-107	0.235744	0.555	0.388	7.56095e-103	2	Ap3s1
Aldh8a1	1.10432e-106	0.241466	0.705	0.564	1.5784e-102	2	Aldh8a1
Tpi1	4.90187e-106	0.223577	0.983	0.991	7.00624e-102	2	Tpi1
Ube2d3	1.8341e-104	0.226714	0.886	0.867	2.62148e-100	2	Ube2d3
Hmgcl	7.19325e-103	0.244832	0.891	0.89	1.02813e-98	2	Hmgcl
Calm2	8.48708e-103	0.228249	0.906	0.872	1.21306e-98	2	Calm2
Msra	6.07619e-102	0.235297	0.664	0.531	8.6847e-98	2	Msra
Dynlrb1	1.36989e-101	0.230399	0.788	0.656	1.95798e-97	2	Dynlrb1
Bccip	1.38613e-101	0.232381	0.71	0.582	1.98119e-97	2	Bccip
A2ml1	7.71847e-101	0.298839	0.86	0.791	1.1032e-96	2	A2ml1
Sod2	1.20824e-100	0.254907	0.77	0.648	1.72694e-96	2	Sod2
Pfn1	2.45835e-100	0.215314	0.961	0.957	3.51371e-96	2	Pfn1
Pnpla7	6.40797e-100	0.225638	0.987	0.979	9.15891e-96	2	Pnpla7
Gbe1	2.65806e-99	0.203665	0.264	0.131	3.79916e-95	2	Gbe1
Cnbp	3.08854e-99	0.229947	0.918	0.909	4.41444e-95	2	Cnbp
Hnrnpa3	3.75562e-99	0.230225	0.906	0.881	5.36791e-95	2	Hnrnpa3
Echs1	4.38434e-99	0.208833	0.951	0.956	6.26654e-95	2	Echs1
Glrx	4.69995e-99	0.22358	0.392	0.238	6.71763e-95	2	Glrx
Msrb1	6.99213e-99	0.21203	0.79	0.646	9.99385e-95	2	Msrb1
Hao1	1.08655e-98	0.215836	0.742	0.599	1.55301e-94	2	Hao1
Khk	9.26708e-98	0.241321	0.79	0.639	1.32454e-93	2	Khk
Snx3	1.6942e-97	0.224366	0.761	0.638	2.42152e-93	2	Snx3
Tubb2a	5.36677e-96	0.239223	0.949	0.954	7.67073e-92	2	Tubb2a
Wfdc21	8.21003e-95	0.224329	0.871	0.73	1.17346e-90	2	Wfdc21
Arl6ip5	8.54291e-95	0.269055	0.567	0.415	1.22104e-90	2	Arl6ip5
Cyp3a11	1.16716e-93	0.274471	0.875	0.798	1.66823e-89	2	Cyp3a11
Gstm2	4.14515e-91	0.600368	0.611	0.475	5.92466e-87	2	Gstm2
Hnrnpk	4.62013e-91	0.203017	0.807	0.68	6.60355e-87	2	Hnrnpk
Idh1	8.13508e-91	0.226669	0.825	0.737	1.16275e-86	2	Idh1
Perp	8.28449e-91	0.210457	0.724	0.597	1.1841e-86	2	Perp
Car8	5.27055e-89	0.218212	0.792	0.66	7.5332e-85	2	Car8
Pygl	8.08732e-89	0.230905	0.687	0.568	1.15592e-84	2	Pygl
Acp1	1.53944e-88	0.207793	0.759	0.643	2.20032e-84	2	Acp1
Txn1	3.89521e-88	0.223238	0.742	0.61	5.56743e-84	2	Txn1
Hp1	4.14826e-88	0.220121	1	0.997	5.92911e-84	2	Hp
Ces2c	5.80807e-88	0.236327	0.535	0.372	8.30148e-84	2	Ces2c
Cmpk1	1.01346e-87	0.205119	0.698	0.58	1.44855e-83	2	Cmpk1
Fam162a	1.33759e-87	0.20628	0.773	0.642	1.91182e-83	2	Fam162a
Park7	2.69754e-87	0.216345	0.912	0.906	3.85559e-83	2	Park7
Lap3	4.63237e-87	0.204392	0.89	0.855	6.62105e-83	2	Lap3
Mtch2	1.60684e-86	0.205225	0.797	0.676	2.29666e-82	2	Mtch2
Ubxn1	3.46234e-86	0.221542	0.897	0.872	4.94873e-82	2	Ubxn1
Otc	2.26366e-85	0.23164	0.583	0.458	3.23545e-81	2	Otc
Slc48a1	1.10664e-84	0.275474	0.655	0.545	1.58172e-80	2	Slc48a1
Pgam1	6.9934e-84	0.200764	0.814	0.691	9.99567e-80	2	Pgam1
Vdac3	1.51716e-83	0.211802	0.773	0.659	2.16847e-79	2	Vdac3
Slpi	1.72602e-83	0.311896	0.721	0.583	2.467e-79	2	Slpi
Srxn1	2.63919e-81	0.21566	0.217	0.106	3.7722e-77	2	Srxn1
Insig2	1.40699e-80	0.203654	0.673	0.548	2.01101e-76	2	Insig2
Bst2	1.32219e-79	0.211981	0.941	0.925	1.88981e-75	2	Bst2
Gclm	3.44242e-79	0.225758	0.787	0.67	4.92025e-75	2	Gclm
Ugt2b36	3.72862e-79	0.204482	0.808	0.673	5.32932e-75	2	Ugt2b36
Cth	1.19794e-78	0.209146	0.712	0.597	1.71222e-74	2	Cth
Qprt1	1.91757e-78	0.202714	0.833	0.696	2.74078e-74	2	Qprt
Ugdh	2.42532e-78	0.204697	0.276	0.153	3.46651e-74	2	Ugdh
Mgst3	2.61953e-78	0.264638	0.694	0.57	3.7441e-74	2	Mgst3
Gng12	3.99923e-78	0.200531	0.589	0.443	5.7161e-74	2	Gng12
Gstp1	3.19706e-77	0.434686	1	1	4.56955e-73	2	Gstp1
Cstb	8.74118e-76	0.241851	0.846	0.806	1.24938e-71	2	Cstb
Glrx5	5.68287e-75	0.213088	0.752	0.64	8.12252e-71	2	Glrx5
Ran	1.33418e-74	0.215322	0.897	0.887	1.90695e-70	2	Ran
Hgd	2.87237e-74	0.213028	0.627	0.517	4.10547e-70	2	Hgd
Acy3	1.91408e-73	0.212349	0.484	0.346	2.73579e-69	2	Acy3
Gsr	4.54245e-73	0.209414	0.319	0.195	6.49252e-69	2	Gsr
Prdx3	1.63583e-72	0.219088	0.859	0.857	2.33809e-68	2	Prdx3
Creg1	3.25831e-70	0.287893	0.94	0.94	4.65711e-66	2	Creg1
Suclg2	1.76176e-65	0.20398	0.564	0.463	2.51808e-61	2	Suclg2
Cyp2a5	6.81033e-64	0.637861	0.36	0.245	9.734e-60	2	Cyp2a5
Cd91	1.3705e-45	0.261911	0.902	0.92	1.95885e-41	2	Cd9
Scd11	1.36495e-39	0.215458	0.9	0.903	1.95093e-35	2	Scd1
Cyp2a41	5.59766e-38	0.221839	0.935	0.92	8.00074e-34	2	Cyp2a4
Selenbp11	1.18728e-31	0.208111	0.841	0.874	1.69698e-27	2	Selenbp1
Cyp2e1	0	2.16274	0.832	0.121	0	3	Cyp2e1
Lect2	0	1.46356	0.976	0.743	0	3	Lect2
Serpina7	0	1.45051	0.693	0.135	0	3	Serpina7
Rnase4	0	1.40275	0.858	0.596	0	3	Rnase4
Ang	0	1.31632	0.814	0.423	0	3	Ang
Ctsl	0	1.18756	0.995	0.99	0	3	Ctsl
Pon1	0	1.09918	0.864	0.366	0	3	Pon1
Hspa5	0	1.09428	0.985	0.962	0	3	Hspa5
Igfbp11	0	1.09012	0.998	0.996	0	3	Igfbp1
Gulo	0	1.04594	0.849	0.323	0	3	Gulo
Slco1b2	0	0.898194	0.609	0.128	0	3	Slco1b2
Dnajc3	0	0.881584	0.992	0.963	0	3	Dnajc3
P4hb1	0	0.876928	0.999	0.999	0	3	P4hb
Srm	0	0.815014	0.802	0.428	0	3	Srm
Rplp0	0	0.804777	0.999	0.987	0	3	Rplp0
Srpr	0	0.788434	0.909	0.594	0	3	Srpr
Hsp90b11	0	0.778387	0.999	0.994	0	3	Hsp90b1
Eef2	0	0.727144	0.96	0.735	0	3	Eef2
Lman1	0	0.672959	0.907	0.625	0	3	Lman1
Hsp90ab1	0	0.670795	0.999	0.991	0	3	Hsp90ab1
Hdlbp	0	0.668873	0.921	0.63	0	3	Hdlbp
Trabd	0	0.659561	0.711	0.262	0	3	Trabd
Oat	0	0.65907	0.542	0.058	0	3	Oat
Tmed9	0	0.6435	0.866	0.564	0	3	Tmed9
Neat11	0	0.621228	0.667	0.189	0	3	Neat1
Rpsa	0	0.613313	1	0.997	0	3	Rpsa
Sec61a1	0	0.600611	0.757	0.281	0	3	Sec61a1
Slc13a3	0	0.598803	0.478	0.061	0	3	Slc13a3
Vcp	0	0.581024	0.821	0.441	0	3	Vcp
Abcc2	0	0.579646	0.729	0.217	0	3	Abcc2
Cope	0	0.579164	0.981	0.889	0	3	Cope
Rpl18	0	0.568023	1	0.998	0	3	Rpl18
Rpl18a	0	0.5604	1	0.999	0	3	Rpl18a
Tmed3	0	0.55328	0.675	0.226	0	3	Tmed3
Edem2	0	0.552561	0.679	0.195	0	3	Edem2
Plpp5	0	0.546901	0.637	0.22	0	3	Plpp5
Saraf	0	0.53528	0.605	0.178	0	3	Saraf
Clptm1l	0	0.488664	0.618	0.159	0	3	Clptm1l
Cyp27a1	0	0.487724	0.612	0.15	0	3	Cyp27a1
Rab3d	0	0.475425	0.532	0.097	0	3	Rab3d
Nucb2	0	0.460906	0.525	0.115	0	3	Nucb2
Tmem56	0	0.456629	0.567	0.179	0	3	Tmem56
Tcf25	0	0.448142	0.688	0.255	0	3	Tcf25
Plbd1	0	0.445401	0.524	0.108	0	3	Plbd1
Por	0	0.440443	0.597	0.178	0	3	Por
Gmppb	0	0.399635	0.516	0.145	0	3	Gmppb
Lonp1	0	0.390775	0.426	0.088	0	3	Lonp1
Psat1	0	0.364908	0.453	0.109	0	3	Psat1
Npdc1	0	0.360497	0.412	0.092	0	3	Npdc1
Cdh17	0	0.334028	0.29	0.031	0	3	Cdh17
Pkm	0	0.324835	0.221	0.022	0	3	Pkm
Asns	0	0.298066	0.354	0.06	0	3	Asns
Avpr1a	0	0.265033	0.296	0.025	0	3	Avpr1a
Reln	0	0.261139	0.279	0.034	0	3	Reln
Pmm1	0	0.230491	0.148	0.008	0	3	Pmm1
Pdia61	2.80235e-304	0.611883	0.994	0.989	4.0054e-300	3	Pdia6
Eef1a1	1.80289e-302	0.583585	1	0.999	2.57687e-298	3	Eef1a1
Get4	2.52349e-302	0.474961	0.691	0.272	3.60683e-298	3	Get4
Rps8	9.84306e-302	0.46485	1	1	1.40687e-297	3	Rps8
Ddost	1.04498e-301	0.577526	0.921	0.656	1.49359e-297	3	Ddost
Gpc3	1.50383e-301	0.822578	0.649	0.262	2.14943e-297	3	Gpc3
Mia3	1.79258e-301	0.384531	0.493	0.136	2.56214e-297	3	Mia3
Rpl8	1.51907e-300	0.53948	0.997	0.989	2.1712e-296	3	Rpl8
Aox3	4.57562e-300	0.313034	0.377	0.079	6.53993e-296	3	Aox3
Ugt2b34	1.29937e-299	0.511036	0.706	0.283	1.85719e-295	3	Ugt2b34
Rgn	1.2515e-298	1.1761	0.572	0.196	1.78876e-294	3	Rgn
Nans	1.75129e-298	0.390121	0.587	0.184	2.50312e-294	3	Nans
Gstm21	7.334e-296	0.787189	0.839	0.473	1.04825e-291	3	Gstm2
Ssr1	1.34407e-293	0.357763	0.577	0.179	1.92108e-289	3	Ssr1
Slc22a1	3.95159e-291	0.517362	0.597	0.207	5.64801e-287	3	Slc22a1
Derl1	5.43069e-291	0.704053	0.897	0.658	7.76208e-287	3	Derl1
Rpl13	3.12629e-290	0.483132	1	0.999	4.46841e-286	3	Rpl13
Surf4	8.06613e-290	0.544086	0.941	0.714	1.15289e-285	3	Surf4
Calr	7.41553e-287	0.603501	0.911	0.714	1.0599e-282	3	Calr
Akr1b3	2.15469e-285	0.425691	0.54	0.166	3.07969e-281	3	Akr1b3
Cyp2a22	5.53384e-282	0.390321	0.201	0.022	7.90952e-278	3	Cyp2a22
Apob1	6.84588e-282	0.620174	0.966	0.883	9.78482e-278	3	Apob
Slc35b1	1.73773e-281	0.571632	0.912	0.648	2.48373e-277	3	Slc35b1
H13	4.97591e-280	0.650311	0.872	0.61	7.11207e-276	3	H13
Ica1	3.77681e-278	0.267475	0.325	0.062	5.3982e-274	3	Ica1
Rack1	1.30276e-274	0.561225	0.923	0.673	1.86203e-270	3	Rack1
Slc38a10	4.21909e-274	0.249395	0.313	0.059	6.03035e-270	3	Slc38a10
Insc	4.22938e-269	0.255947	0.346	0.073	6.04505e-265	3	Insc
Fbxw9	2.25415e-268	0.399039	0.527	0.169	3.22185e-264	3	Fbxw9
Itih21	7.06127e-266	0.512046	0.974	0.886	1.00927e-261	3	Itih2
Akr1a1	9.59863e-266	0.454881	0.99	0.936	1.37193e-261	3	Akr1a1
Rpn2	2.18511e-264	0.495744	0.819	0.478	3.12318e-260	3	Rpn2
Rpl4	3.9592e-264	0.486939	0.976	0.865	5.65889e-260	3	Rpl4
Selenos	4.82968e-264	0.576744	0.948	0.883	6.90306e-260	3	Selenos
Fermt2	5.70898e-263	0.372603	0.598	0.21	8.15984e-259	3	Fermt2
Uba5	1.64355e-262	0.443657	0.648	0.257	2.34913e-258	3	Uba5
Ssr3	1.63883e-261	0.570267	0.856	0.569	2.34238e-257	3	Ssr3
Preb	4.22743e-259	0.36514	0.563	0.191	6.04227e-255	3	Preb
Lmna	4.40944e-259	0.341661	0.47	0.137	6.30242e-255	3	Lmna
Eif4g1	5.21121e-256	0.34526	0.537	0.175	7.44838e-252	3	Eif4g1
Ldha1	2.83959e-255	0.590917	0.995	0.993	4.05862e-251	3	Ldha
Slc39a7	8.14122e-255	0.345646	0.513	0.162	1.16362e-250	3	Slc39a7
Hspa13	4.69847e-252	0.283349	0.395	0.1	6.71553e-248	3	Hspa13
Rps4x	2.66487e-250	0.446798	0.998	0.998	3.8089e-246	3	Rps4x
Dad1	5.49144e-248	0.448891	0.996	0.98	7.84892e-244	3	Dad1
Stt3a	5.63e-248	0.389256	0.64	0.25	8.04696e-244	3	Stt3a
Hid1	1.43346e-247	0.207007	0.237	0.037	2.04884e-243	3	Hid1
Cpox	9.65793e-245	0.249498	0.325	0.07	1.38041e-240	3	Cpox
Actb1	1.84065e-244	0.527884	1	0.998	2.63084e-240	3	Actb
BC003331	7.34702e-240	0.270205	0.409	0.109	1.05011e-235	3	BC003331
Nars	2.47065e-239	0.39859	0.659	0.268	3.5313e-235	3	Nars
Rabac1	2.88644e-239	0.470406	0.655	0.282	4.12558e-235	3	Rabac1
Lrrc59	1.18625e-238	0.303114	0.436	0.125	1.6955e-234	3	Lrrc59
Os9	1.31798e-238	0.399829	0.637	0.256	1.88379e-234	3	Os9
Pla2g12a	2.57206e-238	0.275148	0.348	0.081	3.67624e-234	3	Pla2g12a
Phgdh	7.44092e-237	0.250262	0.29	0.057	1.06353e-232	3	Phgdh
Rpn1	2.78102e-236	0.478116	0.844	0.549	3.97492e-232	3	Rpn1
Pdia3	8.18721e-236	0.562698	0.984	0.966	1.1702e-231	3	Pdia3
Tst	1.75536e-235	0.458361	0.982	0.94	2.50894e-231	3	Tst
Selenom	8.62468e-235	0.346533	0.435	0.125	1.23273e-230	3	Selenom
Map2k2	3.05304e-234	0.451019	0.872	0.576	4.36371e-230	3	Map2k2
Gps1	8.44747e-234	0.35846	0.58	0.216	1.2074e-229	3	Gps1
Eif2b4	5.23942e-233	0.251623	0.36	0.088	7.4887e-229	3	Eif2b4
Mlec	1.32002e-232	0.310722	0.491	0.158	1.88671e-228	3	Mlec
Cd14	1.20194e-231	0.524615	0.46	0.144	1.71793e-227	3	Cd14
Ctsd	3.98815e-231	0.466175	0.87	0.593	5.70027e-227	3	Ctsd
H2-K11	5.52593e-231	0.474643	0.994	0.975	7.89821e-227	3	H2-K1
Golgb11	4.52783e-229	0.328898	0.529	0.183	6.47163e-225	3	Golgb1
Ssr2	1.80097e-227	0.49527	0.929	0.773	2.57412e-223	3	Ssr2
Ccnd1	1.99452e-227	0.268622	0.349	0.085	2.85076e-223	3	Ccnd1
Erp29	9.85464e-227	0.487639	0.823	0.529	1.40852e-222	3	Erp29
Mfge8	1.38696e-226	0.391761	0.45	0.141	1.98239e-222	3	Mfge8
Eif5a1	1.71325e-226	0.411515	0.997	0.995	2.44875e-222	3	Eif5a
Osgin11	1.30115e-225	0.429046	0.533	0.192	1.85973e-221	3	Osgin1
Eef1g	2.31311e-225	0.464782	0.874	0.596	3.30613e-221	3	Eef1g
Malat11	3.56074e-225	0.602449	0.948	0.851	5.08937e-221	3	Malat1
Tm9sf3	5.21986e-225	0.34148	0.589	0.224	7.46074e-221	3	Tm9sf3
Ssr4	7.43398e-224	0.422012	0.999	0.99	1.06254e-219	3	Ssr4
Atp2a2	8.42518e-224	0.236002	0.321	0.074	1.20421e-219	3	Atp2a2
Snd1	9.68163e-224	0.253545	0.341	0.083	1.3838e-219	3	Snd1
Rnh1	2.58604e-223	0.475247	0.831	0.536	3.69623e-219	3	Rnh1
Sdf2l1	4.09994e-223	0.663843	0.732	0.431	5.86004e-219	3	Sdf2l1
Ccdc47	1.01636e-220	0.36405	0.56	0.212	1.45268e-216	3	Ccdc47
Fkbp11	1.01906e-220	0.687521	0.953	0.918	1.45655e-216	3	Fkbp11
Mcfd2	1.12481e-220	0.546259	0.89	0.655	1.6077e-216	3	Mcfd2
Mdh2	7.52968e-219	0.490397	0.937	0.758	1.07622e-214	3	Mdh2
Aqp9	3.08036e-217	0.240138	0.335	0.081	4.40276e-213	3	Aqp9
Odc1	5.29529e-215	0.251034	0.347	0.089	7.56856e-211	3	Odc1
Spcs2	7.84632e-215	0.3989	0.997	0.991	1.12147e-210	3	Spcs2
Guk1	1.22737e-214	0.462013	0.839	0.558	1.75428e-210	3	Guk1
Bckdha	1.20114e-213	0.314861	0.45	0.146	1.71679e-209	3	Bckdha
Psmd2	3.17603e-213	0.310651	0.504	0.175	4.5395e-209	3	Psmd2
Sec63	4.0828e-213	0.247172	0.362	0.096	5.83555e-209	3	Sec63
Sqstm1	1.00846e-212	0.828683	0.849	0.618	1.44139e-208	3	Sqstm1
Nags	2.55424e-212	0.332466	0.557	0.211	3.65077e-208	3	Nags
Smim14	6.94376e-211	0.512896	0.849	0.615	9.92471e-207	3	Smim14
Dst	1.44165e-210	0.21357	0.267	0.055	2.06055e-206	3	Dst
Stt3b	1.8058e-210	0.281956	0.444	0.14	2.58102e-206	3	Stt3b
Tmem214	2.3435e-210	0.251569	0.38	0.105	3.34956e-206	3	Tmem214
Atf5	4.60584e-210	0.708328	0.772	0.506	6.58312e-206	3	Atf5
Edem1	7.24822e-209	0.323057	0.544	0.202	1.03599e-204	3	Edem1
Slc25a39	1.93906e-208	0.39124	0.996	0.985	2.7715e-204	3	Slc25a39
Pebp1	2.19613e-208	0.436148	0.899	0.643	3.13893e-204	3	Pebp1
Anxa2	2.31248e-207	0.613243	0.875	0.635	3.30522e-203	3	Anxa2
Eif3c	3.15742e-207	0.441132	0.758	0.433	4.51291e-203	3	Eif3c
App	7.63961e-206	0.303087	0.376	0.107	1.09193e-201	3	App
Tram1	2.91574e-204	0.421062	0.823	0.534	4.16747e-200	3	Tram1
Serpinf21	2.91274e-202	0.407655	0.996	0.99	4.16317e-198	3	Serpinf2
Arcn1	1.07278e-201	0.322449	0.576	0.225	1.53332e-197	3	Arcn1
H2-D11	1.34038e-201	0.56581	0.966	0.925	1.9158e-197	3	H2-D1
Rrbp11	4.27757e-201	0.412248	0.985	0.948	6.11393e-197	3	Rrbp1
Rpl11	4.7905e-201	0.340559	1	1	6.84706e-197	3	Rpl11
Iqgap21	9.92914e-201	0.33167	0.548	0.21	1.41917e-196	3	Iqgap2
Reep5	2.47896e-200	0.446473	0.846	0.565	3.54318e-196	3	Reep5
Eif3b	4.86922e-200	0.251529	0.388	0.114	6.95957e-196	3	Eif3b
Meg3	5.98884e-200	0.211954	0.232	0.044	8.55985e-196	3	Meg3
Lpl	1.01829e-199	0.394854	0.644	0.29	1.45545e-195	3	Lpl
Cnppd1	1.60338e-199	0.230371	0.274	0.061	2.2917e-195	3	Cnppd1
Agt1	1.93641e-199	0.619627	0.959	0.934	2.76772e-195	3	Agt
Rpl10a	4.14901e-199	0.402509	0.996	0.98	5.93017e-195	3	Rpl10a
Creg11	7.90191e-199	0.541145	0.974	0.937	1.12942e-194	3	Creg1
Gm269171	1.99163e-198	0.605226	0.538	0.239	2.84664e-194	3	Gm26917
Nupr1	2.46712e-198	0.69966	0.222	0.041	3.52625e-194	3	Nupr1
Pgk1	1.23298e-197	0.421318	0.977	0.903	1.7623e-193	3	Pgk1
Txndc5	2.31526e-196	0.412755	0.692	0.364	3.30921e-192	3	Txndc5
Slc33a1	2.66132e-195	0.262016	0.402	0.124	3.80382e-191	3	Slc33a1
Eif3f	2.02923e-193	0.4788	0.833	0.581	2.90038e-189	3	Eif3f
Tor2a	3.54929e-192	0.306041	0.527	0.2	5.07299e-188	3	Tor2a
Ppib	9.06587e-192	0.329219	1	1	1.29578e-187	3	Ppib
Dus1l	1.0236e-191	0.289017	0.46	0.159	1.46302e-187	3	Dus1l
Ddb1	2.42663e-191	0.246907	0.38	0.113	3.46839e-187	3	Ddb1
Anxa7	5.16486e-191	0.324842	0.529	0.204	7.38213e-187	3	Anxa7
Eif4ebp1	5.55056e-191	0.480405	0.889	0.655	7.93342e-187	3	Eif4ebp1
Lgals3	1.21533e-190	0.237671	0.18	0.027	1.73707e-186	3	Lgals3
Cebpb	8.44945e-190	0.461526	0.891	0.718	1.20768e-185	3	Cebpb
Ifrd2	8.98574e-190	0.307131	0.396	0.124	1.28433e-185	3	Ifrd2
Eif3a	1.88268e-189	0.297314	0.492	0.18	2.69092e-185	3	Eif3a
Eif4g2	3.85586e-189	0.347511	0.621	0.274	5.51117e-185	3	Eif4g2
Spcs3	6.99331e-189	0.26388	0.464	0.159	9.99553e-185	3	Spcs3
Rab2a	1.43541e-188	0.421882	0.849	0.593	2.05163e-184	3	Rab2a
Slc17a9	2.88193e-188	0.216624	0.275	0.064	4.11915e-184	3	Slc17a9
Fn11	8.654e-188	0.561436	0.859	0.666	1.23692e-183	3	Fn1
Serpina6	1.90011e-187	0.406995	0.286	0.07	2.71583e-183	3	Serpina6
Rexo2	3.78505e-187	0.457273	0.912	0.735	5.40997e-183	3	Rexo2
Hsp90aa1	4.12645e-187	0.278314	0.418	0.136	5.89794e-183	3	Hsp90aa1
Csn3	4.15757e-187	0.512098	0.429	0.15	5.94241e-183	3	Csn3
Rpl29	1.22845e-186	0.36806	1	0.994	1.75582e-182	3	Rpl29
Spint2	2.17387e-186	0.390496	0.832	0.551	3.10712e-182	3	Spint2
Tpr1	1.28001e-185	0.332021	0.609	0.262	1.82951e-181	3	Tpr
Serinc1	4.551e-185	0.290479	0.526	0.202	6.50474e-181	3	Serinc1
Serp1	4.79996e-185	0.587511	0.94	0.914	6.86059e-181	3	Serp1
Stard10	5.85636e-185	0.465249	0.967	0.973	8.3705e-181	3	Stard10
Mtdh	2.88819e-184	0.332977	0.637	0.29	4.12809e-180	3	Mtdh
Psmd1	5.65168e-184	0.293418	0.513	0.196	8.07794e-180	3	Psmd1
Pgm3	1.92391e-183	0.277698	0.431	0.146	2.74984e-179	3	Pgm3
1810058I24Rik	2.69204e-183	0.499207	0.853	0.595	3.84773e-179	3	1810058I24Rik
Riok3	2.91839e-182	0.298931	0.508	0.191	4.17125e-178	3	Riok3
Agpat3	1.01342e-181	0.256023	0.424	0.141	1.44849e-177	3	Agpat3
mt-Cytb1	1.2506e-181	0.404837	0.997	0.983	1.78748e-177	3	mt-Cytb
Serpinb6a	3.76236e-181	0.511557	0.5	0.199	5.37754e-177	3	Serpinb6a
Yrdc	1.07018e-179	0.31619	0.503	0.194	1.52961e-175	3	Yrdc
Fau	4.94888e-179	0.314911	1	1	7.07344e-175	3	Fau
Ppt2	1.21513e-178	0.283629	0.443	0.156	1.73679e-174	3	Ppt2
Atf6	3.56059e-178	0.217897	0.273	0.066	5.08916e-174	3	Atf6
Copb1	1.58744e-177	0.291687	0.452	0.163	2.26893e-173	3	Copb1
Glud11	3.31889e-177	0.501492	0.995	0.999	4.74368e-173	3	Glud1
Psmd3	5.24877e-177	0.256085	0.385	0.123	7.50207e-173	3	Psmd3
Ubxn4	2.24109e-176	0.414091	0.778	0.49	3.20319e-172	3	Ubxn4
Exosc5	2.54991e-176	0.278015	0.445	0.158	3.64459e-172	3	Exosc5
Adrm1	1.76684e-175	0.409213	0.79	0.516	2.52535e-171	3	Adrm1
Uso1	1.81518e-175	0.21061	0.3	0.078	2.59444e-171	3	Uso1
Rps3a1	9.94868e-175	0.354168	1	0.999	1.42197e-170	3	Rps3a1
Dnajb9	1.29506e-174	0.325527	0.452	0.166	1.85103e-170	3	Dnajb9
Tubb6	4.19157e-174	0.334332	0.533	0.22	5.99101e-170	3	Tubb6
Ddx24	5.34268e-174	0.279577	0.508	0.199	7.6363e-170	3	Ddx24
Ltbr	9.07856e-174	0.308869	0.576	0.245	1.2976e-169	3	Ltbr
Dpp3	2.11806e-173	0.20668	0.305	0.082	3.02734e-169	3	Dpp3
Tmem248	2.95897e-173	0.294818	0.537	0.217	4.22926e-169	3	Tmem248
Eif3d	1.14724e-172	0.283093	0.5	0.193	1.63974e-168	3	Eif3d
Sec11c	2.8586e-172	0.425804	0.856	0.629	4.08579e-168	3	Sec11c
Kdelr1	1.62222e-171	0.41646	0.899	0.687	2.31864e-167	3	Kdelr1
Hint1	5.33857e-171	0.323109	0.999	0.998	7.63042e-167	3	Hint1
Hsd3b7	7.55338e-171	0.490106	0.747	0.482	1.07961e-166	3	Hsd3b7
Tm9sf2	1.0955e-170	0.304222	0.565	0.241	1.5658e-166	3	Tm9sf2
Copb2	1.82491e-170	0.286899	0.522	0.208	2.60835e-166	3	Copb2
Leprotl1	2.139e-169	0.289025	0.532	0.216	3.05727e-165	3	Leprotl1
Tmed5	7.50539e-169	0.326858	0.634	0.303	1.07275e-164	3	Tmed5
Wasl	2.20231e-168	0.293327	0.597	0.265	3.14776e-164	3	Wasl
Creb3	4.33791e-168	0.244348	0.42	0.145	6.20018e-164	3	Creb3
Cyp4a31	1.71951e-167	0.228782	0.294	0.079	2.4577e-163	3	Cyp4a31
Prkcsh	1.03449e-165	0.363466	0.723	0.421	1.4786e-161	3	Prkcsh
Csde1	1.29412e-165	0.232505	0.383	0.125	1.84968e-161	3	Csde1
Copa	1.51773e-165	0.226953	0.362	0.114	2.16929e-161	3	Copa
Qars	1.86726e-165	0.201616	0.305	0.084	2.66888e-161	3	Qars
Rps2	3.95196e-165	0.349938	1	1	5.64854e-161	3	Rps2
Cct2	8.80132e-165	0.29065	0.525	0.214	1.25797e-160	3	Cct2
Pon2	1.36452e-164	0.315627	0.603	0.276	1.95032e-160	3	Pon2
Dnpep	1.79343e-164	0.293483	0.558	0.241	2.56334e-160	3	Dnpep
Nme6	2.22013e-164	0.357168	0.564	0.248	3.17323e-160	3	Nme6
Grn	5.40233e-163	0.299956	0.548	0.233	7.72156e-159	3	Grn
Cyp2d40	4.49582e-162	0.303199	0.352	0.111	6.42587e-158	3	Cyp2d40
Slc35c2	4.98596e-162	0.241064	0.385	0.128	7.12643e-158	3	Slc35c2
CAAA01118383.1	9.28286e-162	0.249418	0.454	0.169	1.3268e-157	3	CAAA01118383.1
Rpl9-ps6	1.30234e-161	0.359866	1	0.993	1.86144e-157	3	Rpl9-ps6
Tbc1d15	4.74148e-161	0.289125	0.513	0.211	6.777e-157	3	Tbc1d15
Mgat2	1.9549e-160	0.278144	0.442	0.166	2.79414e-156	3	Mgat2
Prdx4	3.10472e-160	0.359689	0.939	0.828	4.43757e-156	3	Prdx4
Ddx56	3.65174e-160	0.236814	0.383	0.13	5.21943e-156	3	Ddx56
Mettl7b	3.90956e-160	0.598987	0.934	0.892	5.58793e-156	3	Mettl7b
Slc48a11	4.82375e-160	0.488053	0.794	0.548	6.89459e-156	3	Slc48a1
Mia2	1.2607e-159	0.367399	0.694	0.395	1.80192e-155	3	Mia2
C31	1.28145e-159	0.447804	0.966	0.946	1.83158e-155	3	C3
Eif6	2.39788e-159	0.427264	0.855	0.623	3.42728e-155	3	Eif6
Rpl3	3.78716e-159	0.369242	0.983	0.948	5.41298e-155	3	Rpl3
Srp9	8.95207e-159	0.365045	0.976	0.956	1.27952e-154	3	Srp9
Sel1l	9.21729e-159	0.203496	0.276	0.073	1.31743e-154	3	Sel1l
Eif5b	1.16562e-158	0.246338	0.432	0.157	1.66602e-154	3	Eif5b
Dcaf11	1.38112e-158	0.283703	0.532	0.223	1.97404e-154	3	Dcaf11
Eif5	1.42378e-158	0.485959	0.849	0.615	2.03501e-154	3	Eif5
Gabarap	7.53013e-158	0.372165	0.99	0.971	1.07628e-153	3	Gabarap
Son1	9.81182e-158	0.253433	0.461	0.177	1.4024e-153	3	Son
Cct3	1.07836e-157	0.268107	0.476	0.187	1.5413e-153	3	Cct3
Cldn2	1.89328e-157	0.241176	0.397	0.137	2.70607e-153	3	Cldn2
Ift20	2.23667e-157	0.403952	0.861	0.644	3.19687e-153	3	Ift20
Lman2	2.49759e-156	0.353449	0.74	0.46	3.5698e-152	3	Lman2
C1rl	3.42919e-156	0.292533	0.548	0.237	4.90135e-152	3	C1rl
Chid1	3.39222e-155	0.257784	0.447	0.17	4.8485e-151	3	Chid1
mt-Nd4l1	4.36214e-155	0.347456	0.995	0.966	6.23481e-151	3	mt-Nd4l
Calu	7.26153e-155	0.228541	0.388	0.134	1.03789e-150	3	Calu
Vmp1	7.45731e-155	0.465539	0.82	0.605	1.06587e-150	3	Vmp1
Sord	1.0149e-153	0.526385	0.753	0.543	1.4506e-149	3	Sord
Tmed2	2.49672e-153	0.429889	0.962	0.936	3.56855e-149	3	Tmed2
Grhpr1	5.82969e-153	0.361115	0.974	0.944	8.33237e-149	3	Grhpr
Eef1b2	6.48049e-153	0.417022	0.948	0.863	9.26257e-149	3	Eef1b2
Eif4a1	2.58375e-152	0.287687	0.604	0.281	3.69295e-148	3	Eif4a1
Sars	3.28058e-152	0.294419	0.509	0.213	4.68893e-148	3	Sars
Dnajc1	3.826e-152	0.249976	0.407	0.147	5.46851e-148	3	Dnajc1
Kif21a	5.3907e-152	0.265478	0.496	0.203	7.70493e-148	3	Kif21a
Dnajc10	5.49358e-152	0.23256	0.375	0.128	7.85197e-148	3	Dnajc10
Imp3	2.90865e-151	0.30964	0.59	0.281	4.15733e-147	3	Imp3
Eprs	3.45911e-151	0.355851	0.672	0.373	4.9441e-147	3	Eprs
Eif3j1	1.96797e-150	0.291	0.565	0.253	2.81282e-146	3	Eif3j1
Itgb1	3.90528e-150	0.249668	0.474	0.189	5.58182e-146	3	Itgb1
F51	6.74272e-150	0.34281	0.647	0.346	9.63737e-146	3	F5
Tomm70a	7.03693e-150	0.268336	0.51	0.214	1.00579e-145	3	Tomm70a
S100g	1.44146e-149	0.447746	0.209	0.046	2.06028e-145	3	S100g
Tnfaip8l1	1.97243e-149	0.250368	0.45	0.174	2.81919e-145	3	Tnfaip8l1
Bdh1	2.06286e-149	0.391126	0.711	0.446	2.94845e-145	3	Bdh1
Luc7l2	2.24945e-149	0.232233	0.389	0.137	3.21513e-145	3	Luc7l2
Cp1	3.23922e-149	0.5172	0.915	0.897	4.62982e-145	3	Cp
Ptp4a2	8.32187e-149	0.212388	0.358	0.119	1.18944e-144	3	Ptp4a2
Gpt2	1.30618e-148	0.293917	0.447	0.177	1.86692e-144	3	Gpt2
Sys1	1.59537e-148	0.230471	0.398	0.142	2.28026e-144	3	Sys1
Akr1b7	2.10506e-148	0.301176	0.301	0.089	3.00876e-144	3	Akr1b7
Abcf1	2.30504e-148	0.228541	0.399	0.143	3.2946e-144	3	Abcf1
Hpn1	6.76754e-148	0.32448	0.952	0.8	9.67285e-144	3	Hpn
Prdx31	1.92114e-147	0.359836	0.938	0.849	2.74588e-143	3	Prdx3
Trmt112	2.34901e-147	0.357045	0.895	0.691	3.35744e-143	3	Trmt112
Arpc1b	2.80455e-147	0.366879	0.956	0.906	4.00855e-143	3	Arpc1b
Rpl28	4.09511e-147	0.331689	0.999	0.992	5.85314e-143	3	Rpl28
Gnb2	8.20467e-147	0.332654	0.909	0.684	1.17269e-142	3	Gnb2
Hspa9	1.04531e-146	0.462217	0.785	0.561	1.49407e-142	3	Hspa9
Rpl6	1.43764e-146	0.340962	0.999	0.995	2.05481e-142	3	Rpl6
Nr2c2ap	2.21163e-146	0.251366	0.402	0.147	3.16108e-142	3	Nr2c2ap
Pex11g	6.58701e-146	0.250709	0.48	0.197	9.41481e-142	3	Pex11g
Sdf4	1.61499e-145	0.342973	0.789	0.522	2.30831e-141	3	Sdf4
Agmat	1.93109e-145	0.254176	0.451	0.178	2.7601e-141	3	Agmat
Aldh2	2.28709e-145	0.381108	0.988	0.971	3.26894e-141	3	Aldh2
Btg3	2.30918e-145	0.271964	0.451	0.179	3.30051e-141	3	Btg3
Gars	3.94371e-145	0.257817	0.379	0.136	5.63674e-141	3	Gars
Kif5c	4.38968e-145	0.254627	0.407	0.151	6.27418e-141	3	Kif5c
Magt1	3.06515e-144	0.219373	0.422	0.157	4.38102e-140	3	Magt1
Rnf187	7.55553e-144	0.251117	0.49	0.203	1.07991e-139	3	Rnf187
Cdipt	1.17314e-143	0.233033	0.416	0.157	1.67677e-139	3	Cdipt
Tmed4	3.92992e-143	0.310326	0.601	0.297	5.61703e-139	3	Tmed4
Rps3	4.21616e-143	0.369676	0.994	0.979	6.02615e-139	3	Rps3
Chmp4b	4.50945e-143	0.250057	0.498	0.209	6.44535e-139	3	Chmp4b
Rab1a	7.15277e-143	0.245637	0.518	0.22	1.02235e-138	3	Rab1a
Pah	1.3526e-142	0.427575	0.742	0.498	1.93328e-138	3	Pah
Id1	2.41503e-142	0.455892	0.321	0.107	3.45181e-138	3	Id1
Cda	1.10276e-141	0.249789	0.5	0.21	1.57618e-137	3	Cda
Nucb1	2.73581e-141	0.226092	0.396	0.146	3.9103e-137	3	Nucb1
Copg1	5.24508e-141	0.219508	0.357	0.123	7.4968e-137	3	Copg1
Hax1	6.49785e-141	0.288671	0.542	0.245	9.28738e-137	3	Hax1
Hectd1	7.02205e-141	0.208264	0.325	0.105	1.00366e-136	3	Hectd1
Cdk5rap3	9.00491e-141	0.285269	0.621	0.312	1.28707e-136	3	Cdk5rap3
Rbm42	1.05335e-140	0.264251	0.488	0.207	1.50556e-136	3	Rbm42
Alcam1	5.94277e-140	0.256867	0.512	0.221	8.494e-136	3	Alcam
Pink1	6.16381e-140	0.323912	0.634	0.341	8.80993e-136	3	Pink1
Mmadhc	7.50522e-140	0.235495	0.455	0.181	1.07272e-135	3	Mmadhc
Cyp2d9	2.05991e-139	0.50138	0.75	0.531	2.94423e-135	3	Cyp2d9
Hacd3	2.11985e-139	0.218579	0.385	0.14	3.0299e-135	3	Hacd3
Rplp1	9.31935e-139	0.386877	0.982	0.936	1.33202e-134	3	Rplp1
Yipf5	4.16175e-138	0.367147	0.704	0.428	5.9484e-134	3	Yipf5
Arf6	2.18984e-137	0.256613	0.437	0.176	3.12994e-133	3	Arf6
Srrm21	3.09086e-137	0.331075	0.709	0.433	4.41776e-133	3	Srrm2
Ogfod2	4.96461e-137	0.227014	0.431	0.169	7.09591e-133	3	Ogfod2
Arhgdia	9.32003e-137	0.281946	0.532	0.241	1.33211e-132	3	Arhgdia
Arfgap2	1.24667e-136	0.232726	0.45	0.181	1.78187e-132	3	Arfgap2
Cyp2a51	1.44563e-136	0.573409	0.523	0.247	2.06624e-132	3	Cyp2a5
Ergic2	3.68911e-136	0.23916	0.491	0.208	5.27285e-132	3	Ergic2
Calm1	2.70364e-135	0.358197	0.976	0.967	3.86431e-131	3	Calm1
Acsl4	7.03322e-135	0.278535	0.487	0.212	1.00526e-130	3	Acsl4
Epn1	9.32116e-135	0.23846	0.455	0.188	1.33227e-130	3	Epn1
Sptbn1	2.18384e-134	0.20456	0.324	0.108	3.12136e-130	3	Sptbn1
Cltc	1.63982e-133	0.234536	0.41	0.158	2.34379e-129	3	Cltc
Ahsg1	1.90699e-133	0.375778	1	1	2.72566e-129	3	Ahsg
Sult1e1	2.17795e-133	0.463201	0.249	0.071	3.11294e-129	3	Sult1e1
Sec62	4.87318e-133	0.303812	0.826	0.579	6.96524e-129	3	Sec62
Cyp1a21	5.97008e-133	0.743772	0.608	0.341	8.53304e-129	3	Cyp1a2
Ywhag	3.93227e-132	0.201857	0.295	0.093	5.6204e-128	3	Ywhag
Wdr1	6.57799e-132	0.235979	0.408	0.16	9.40192e-128	3	Wdr1
Mttp	7.44804e-132	0.236587	0.414	0.164	1.06455e-127	3	Mttp
Ddrgk1	8.31987e-132	0.303727	0.886	0.664	1.18916e-127	3	Ddrgk1
Gcc2	1.8088e-131	0.230893	0.43	0.173	2.58531e-127	3	Gcc2
H6pd	2.48276e-131	0.203917	0.335	0.115	3.54861e-127	3	H6pd
Tax1bp1	2.78863e-131	0.334642	0.845	0.627	3.98579e-127	3	Tax1bp1
Rpl7	5.15971e-131	0.346083	0.97	0.902	7.37478e-127	3	Rpl7
Igfbp21	6.71163e-131	0.66659	0.842	0.714	9.59293e-127	3	Igfbp2
Grina	2.25739e-130	0.342648	0.877	0.698	3.22648e-126	3	Grina
Scn8a	8.17843e-130	0.236826	0.442	0.179	1.16894e-125	3	Scn8a
Krt8	1.84184e-129	0.608501	0.917	0.869	2.63255e-125	3	Krt8
Krtcap2	6.06113e-129	0.27301	0.997	0.984	8.66318e-125	3	Krtcap2
Cyp3a44	6.2017e-129	0.247411	0.142	0.025	8.86409e-125	3	Cyp3a44
Mrps26	7.78358e-129	0.223826	0.43	0.174	1.11251e-124	3	Mrps26
Gorasp2	2.24926e-128	0.333456	0.656	0.382	3.21487e-124	3	Gorasp2
Mvb12a	1.45737e-127	0.313793	0.827	0.594	2.08302e-123	3	Mvb12a
Morf4l2	2.88431e-127	0.285395	0.518	0.24	4.12254e-123	3	Morf4l2
Csnk1a1	3.28027e-127	0.229977	0.47	0.201	4.68849e-123	3	Csnk1a1
Ube2g2	8.32114e-126	0.211696	0.366	0.137	1.18934e-121	3	Ube2g2
Spcs1	2.70163e-125	0.279153	0.997	0.992	3.86144e-121	3	Spcs1
Cyb5b	4.19889e-125	0.262629	0.614	0.316	6.00147e-121	3	Cyb5b
Apoe1	5.40552e-125	0.293416	1	1	7.7261e-121	3	Apoe
Rps161	5.60499e-125	0.2894	1	0.999	8.01121e-121	3	Rps16
1110008F13Rik	8.81436e-125	0.30836	0.916	0.787	1.25984e-120	3	1110008F13Rik
Jak1	9.34668e-125	0.230243	0.449	0.191	1.33592e-120	3	Jak1
Rpl19	5.13624e-124	0.299809	0.999	0.997	7.34123e-120	3	Rpl19
Tmbim61	7.07427e-124	0.267853	1	1	1.01113e-119	3	Tmbim6
Slc6a13	1.09485e-123	0.389049	0.859	0.697	1.56486e-119	3	Slc6a13
Tspo	2.21912e-123	0.357551	0.919	0.787	3.17179e-119	3	Tspo
2810459M11Rik	5.27374e-123	0.203745	0.349	0.128	7.53775e-119	3	2810459M11Rik
Col18a11	2.28245e-122	0.253187	0.445	0.192	3.26231e-118	3	Col18a1
Rpl23	6.33463e-122	0.299244	1	0.996	9.05409e-118	3	Rpl23
Dhrs7	8.39599e-122	0.207248	0.37	0.141	1.20004e-117	3	Dhrs7
Rps111	1.15939e-121	0.317572	0.996	0.981	1.65712e-117	3	Rps11
Gale	1.37934e-121	0.26376	0.516	0.246	1.97149e-117	3	Gale
Pdia4	1.48169e-121	0.421613	0.771	0.554	2.11778e-117	3	Pdia4
Tubb5	4.04531e-121	0.474005	0.784	0.608	5.78197e-117	3	Tubb5
Wdr18	4.72858e-121	0.217917	0.48	0.211	6.75857e-117	3	Wdr18
Pir	1.35262e-120	0.222757	0.41	0.167	1.9333e-116	3	Pir
Ddx39	1.70854e-120	0.232707	0.473	0.209	2.44202e-116	3	Ddx39
Tmem97	2.33329e-120	0.367407	0.861	0.675	3.33497e-116	3	Tmem97
Mst1	3.19993e-120	0.274411	0.601	0.321	4.57366e-116	3	Mst1
Trib3	3.37674e-120	0.389131	0.283	0.096	4.82637e-116	3	Trib3
Slc29a1	3.35582e-119	0.228867	0.447	0.193	4.79648e-115	3	Slc29a1
Hnrnpu	3.4606e-119	0.258411	0.543	0.262	4.94624e-115	3	Hnrnpu
Arpc1a	4.82406e-119	0.245992	0.521	0.248	6.89502e-115	3	Arpc1a
Cyp2d101	7.75856e-119	0.299125	0.963	0.896	1.10893e-114	3	Cyp2d10
Pafah1b1	1.66156e-118	0.235153	0.493	0.225	2.37486e-114	3	Pafah1b1
Mesd	1.81888e-118	0.213316	0.426	0.179	2.59973e-114	3	Mesd
Creb3l3	4.67394e-118	0.295335	0.622	0.352	6.68046e-114	3	Creb3l3
1110065P20Rik	2.62653e-117	0.24636	0.555	0.274	3.7541e-113	3	1110065P20Rik
Napa	2.9012e-117	0.239769	0.583	0.297	4.14669e-113	3	Napa
Lpin2	4.95883e-117	0.21465	0.372	0.146	7.08766e-113	3	Lpin2
Yipf3	1.30856e-116	0.260806	0.569	0.291	1.87033e-112	3	Yipf3
Chchd10	1.63616e-116	0.425454	0.983	0.981	2.33856e-112	3	Chchd10
Psmd13	2.91393e-116	0.296253	0.677	0.413	4.16488e-112	3	Psmd13
Hspa4	6.69543e-116	0.271958	0.557	0.284	9.56977e-112	3	Hspa4
Pabpc1	1.75558e-115	0.358127	0.769	0.552	2.50925e-111	3	Pabpc1
Itih41	2.6032e-115	0.353244	0.917	0.835	3.72075e-111	3	Itih4
Rpl14	1.04425e-114	0.318939	0.99	0.956	1.49255e-110	3	Rpl14
C4b1	2.12174e-114	0.339546	0.629	0.38	3.0326e-110	3	C4b
Creld2	2.17651e-114	0.690045	0.702	0.503	3.11088e-110	3	Creld2
Ncl	4.20027e-114	0.240512	0.432	0.187	6.00345e-110	3	Ncl
Smap1	6.52861e-114	0.247106	0.588	0.306	9.33134e-110	3	Smap1
Rad23b	9.09252e-114	0.231266	0.47	0.213	1.29959e-109	3	Rad23b
Pqlc1	1.46895e-113	0.207085	0.397	0.163	2.09957e-109	3	Pqlc1
Hnf4a	2.34775e-113	0.213371	0.387	0.158	3.35563e-109	3	Hnf4a
Tuba4a	7.33499e-113	0.214657	0.477	0.213	1.04839e-108	3	Tuba4a
Ppp4c	3.52617e-112	0.209912	0.449	0.196	5.03996e-108	3	Ppp4c
Prpsap1	1.04447e-111	0.201886	0.415	0.175	1.49286e-107	3	Prpsap1
Arf1	1.34956e-111	0.289846	0.957	0.914	1.92892e-107	3	Arf1
Arpc5l	1.82988e-111	0.345778	0.767	0.562	2.61545e-107	3	Arpc5l
Cops7a	3.66404e-111	0.255974	0.607	0.328	5.23701e-107	3	Cops7a
Tubb4b	2.12773e-110	0.405481	0.893	0.848	3.04117e-106	3	Tubb4b
Rbm391	8.66436e-110	0.241185	0.554	0.279	1.2384e-105	3	Rbm39
F21	1.43799e-109	0.300823	0.997	0.993	2.05532e-105	3	F2
Selenof	3.08476e-109	0.315439	0.89	0.756	4.40904e-105	3	Selenof
Cct7	3.38074e-109	0.298926	0.7	0.457	4.83209e-105	3	Cct7
Rpl30	9.83676e-109	0.269248	0.999	0.995	1.40597e-104	3	Rpl30
Aaed1	2.19488e-108	0.247459	0.458	0.21	3.13715e-104	3	Aaed1
Apoa51	2.29143e-108	0.322691	0.473	0.231	3.27514e-104	3	Apoa5
Polr2e	2.88982e-108	0.225267	0.548	0.273	4.13042e-104	3	Polr2e
Prg4	4.78914e-108	0.241834	0.318	0.119	6.84512e-104	3	Prg4
Exosc4	1.00795e-107	0.245269	0.542	0.277	1.44066e-103	3	Exosc4
Egfr1	1.23034e-107	0.224439	0.421	0.183	1.75853e-103	3	Egfr
Acbd5	1.882e-107	0.211563	0.442	0.198	2.68995e-103	3	Acbd5
Atp1a11	2.46309e-107	0.214566	0.43	0.19	3.52049e-103	3	Atp1a1
Ghitm	6.28393e-107	0.374328	0.859	0.723	8.98162e-103	3	Ghitm
Psmb4	1.24061e-106	0.280673	0.85	0.64	1.7732e-102	3	Psmb4
Tbrg1	2.19617e-106	0.301818	0.704	0.454	3.13899e-102	3	Tbrg1
Ephx1	4.41393e-106	0.301081	0.507	0.249	6.30883e-102	3	Ephx1
Tmem258	2.00185e-105	0.284952	0.95	0.889	2.86124e-101	3	Tmem258
Psmb5	2.05025e-105	0.292906	0.956	0.899	2.93043e-101	3	Psmb5
Ifngr11	4.33366e-105	0.298821	0.524	0.275	6.1941e-101	3	Ifngr1
Clpp	6.88629e-104	0.269571	0.741	0.499	9.84257e-100	3	Clpp
Jtb	2.51283e-103	0.253176	0.686	0.414	3.59159e-99	3	Jtb
Itm2c	4.47827e-103	0.335643	0.679	0.462	6.40079e-99	3	Itm2c
Gcgr	5.31787e-103	0.28422	0.624	0.376	7.60083e-99	3	Gcgr
Ubc1	6.68932e-103	0.341562	0.865	0.658	9.56105e-99	3	Ubc
2005-03-01	1.05066e-102	0.342669	0.78	0.594	1.5017e-98	3	2005-03-01
Nme1	2.52307e-102	0.226073	0.564	0.29	3.60623e-98	3	Nme1
Ap2m1	2.69386e-102	0.285433	0.842	0.643	3.85034e-98	3	Ap2m1
Acsl1	6.85088e-102	0.22234	0.394	0.172	9.79196e-98	3	Acsl1
Arl6ip4	9.08628e-102	0.220352	0.58	0.305	1.2987e-97	3	Arl6ip4
Srp72	1.44906e-101	0.274211	0.737	0.507	2.07114e-97	3	Srp72
Eif1	1.54028e-101	0.327014	0.998	0.997	2.20153e-97	3	Eif1
Chp1	3.63786e-101	0.258898	0.613	0.353	5.19959e-97	3	Chp1
Manf	3.76026e-101	0.536642	0.914	0.934	5.37453e-97	3	Manf
Rpl36al	5.24567e-101	0.221531	0.999	0.997	7.49764e-97	3	Rpl36al
Txndc12	3.4865e-100	0.225397	0.488	0.237	4.98326e-96	3	Txndc12
Akr1c61	4.63733e-100	0.649535	0.842	0.876	6.62813e-96	3	Akr1c6
Dhrs1	5.3194e-100	0.296976	0.747	0.536	7.60302e-96	3	Dhrs1
Immt	5.71396e-100	0.213403	0.485	0.234	8.16696e-96	3	Immt
Canx	2.1137e-99	0.272738	0.722	0.487	3.0211e-95	3	Canx
Nr1h3	2.41008e-99	0.207547	0.516	0.256	3.44472e-95	3	Nr1h3
C4bp	3.5214e-99	0.320679	0.953	0.951	5.03313e-95	3	C4bp
Pzp1	5.32903e-99	0.387407	0.966	0.974	7.61678e-95	3	Pzp
mt-Nd51	5.67529e-99	0.288381	0.956	0.89	8.11169e-95	3	mt-Nd5
Tmem234	7.07646e-99	0.258953	0.74	0.505	1.01144e-94	3	Tmem234
Dnajb11	8.11348e-99	0.317065	0.779	0.58	1.15966e-94	3	Dnajb11
Zwint	1.07451e-98	0.212167	0.429	0.195	1.5358e-94	3	Zwint
Aifm1	1.53272e-98	0.207075	0.439	0.203	2.19072e-94	3	Aifm1
Lrg11	1.6361e-98	0.548785	0.913	0.993	2.33848e-94	3	Lrg1
Mcrip1	5.09629e-98	0.21682	0.46	0.219	7.28413e-94	3	Mcrip1
Rtn3	1.30315e-97	0.219041	0.562	0.298	1.86259e-93	3	Rtn3
Cyp2c29	1.60268e-97	0.483454	0.393	0.183	2.29072e-93	3	Cyp2c29
Htatip2	1.65886e-97	0.265842	0.59	0.329	2.37101e-93	3	Htatip2
Nedd4	2.12425e-97	0.281837	0.662	0.426	3.0362e-93	3	Nedd4
Pecr	7.46276e-97	0.220404	0.499	0.246	1.06665e-92	3	Pecr
Chmp6	2.08186e-96	0.23057	0.562	0.304	2.97561e-92	3	Chmp6
Isyna1	2.43663e-96	0.242636	0.334	0.138	3.48268e-92	3	Isyna1
Rpl5	2.73721e-96	0.285743	0.894	0.761	3.91229e-92	3	Rpl5
Tomm40	6.71603e-96	0.202463	0.433	0.201	9.59922e-92	3	Tomm40
Rnf128	7.57153e-96	0.20097	0.435	0.202	1.0822e-91	3	Rnf128
Aldoa	1.45577e-95	0.357768	0.788	0.608	2.08073e-91	3	Aldoa
Aamp	2.00054e-95	0.277936	0.713	0.496	2.85938e-91	3	Aamp
Phb2	3.44497e-95	0.268265	0.866	0.676	4.92389e-91	3	Phb2
Scand1	4.33567e-94	0.282118	0.765	0.566	6.19697e-90	3	Scand1
Chd9	1.55614e-93	0.377768	0.675	0.479	2.22419e-89	3	Chd9
Ier31	9.05383e-93	0.527723	0.417	0.201	1.29406e-88	3	Ier3
Cd1511	1.53245e-92	0.236977	0.544	0.295	2.19033e-88	3	Cd151
Mettl9	3.5305e-92	0.276733	0.699	0.484	5.04615e-88	3	Mettl9
Rab1b	9.45691e-92	0.225813	0.612	0.354	1.35168e-87	3	Rab1b
Rab24	1.12295e-90	0.215589	0.523	0.278	1.60503e-86	3	Rab24
Dusp6	1.30949e-90	0.202933	0.372	0.166	1.87166e-86	3	Dusp6
Kyat1	2.56639e-90	0.502483	0.689	0.527	3.66815e-86	3	Kyat1
Emc10	3.40808e-90	0.21783	0.545	0.296	4.87118e-86	3	Emc10
H2-T22	3.1524e-89	0.311824	0.814	0.628	4.50572e-85	3	H2-T22
Yif1b	8.38116e-89	0.203954	0.503	0.26	1.19792e-84	3	Yif1b
Dctn2	6.88155e-88	0.204949	0.57	0.314	9.83581e-84	3	Dctn2
Rps71	7.07443e-88	0.255555	1	0.995	1.01115e-83	3	Rps7
Ugdh1	9.46502e-88	0.24195	0.366	0.163	1.35284e-83	3	Ugdh
Edf1	1.10922e-87	0.234394	0.997	0.986	1.5854e-83	3	Edf1
Ubb	1.8132e-87	0.25344	0.999	1	2.5916e-83	3	Ubb
Atxn10	3.38001e-87	0.260935	0.66	0.441	4.83104e-83	3	Atxn10
Serbp1	3.76011e-87	0.270729	0.827	0.641	5.37432e-83	3	Serbp1
Plin2	4.78795e-87	0.337559	0.817	0.656	6.84341e-83	3	Plin2
P2rx41	1.00714e-86	0.200406	0.47	0.239	1.43951e-82	3	P2rx4
Aprt	1.54092e-86	0.272948	0.807	0.617	2.20243e-82	3	Aprt
Jagn1	1.84184e-86	0.212067	0.507	0.27	2.63254e-82	3	Jagn1
Nat8f2	2.16511e-86	0.229189	0.405	0.193	3.09459e-82	3	Nat8f2
Lgmn	5.85991e-86	0.212828	0.447	0.225	8.37557e-82	3	Lgmn
Ppa1	6.11238e-86	0.261475	0.952	0.918	8.73643e-82	3	Ppa1
Txn2	1.94679e-85	0.351341	0.929	0.896	2.78255e-81	3	Txn2
Yif1a	6.48595e-85	0.23628	0.665	0.429	9.27036e-81	3	Yif1a
Vkorc1	1.505e-84	0.253944	0.951	0.914	2.15109e-80	3	Vkorc1
Rps51	1.62851e-84	0.325979	0.986	0.97	2.32763e-80	3	Rps5
Rpl27a	2.21785e-84	0.272561	0.95	0.891	3.16997e-80	3	Rpl27a
Kdelr2	9.13042e-84	0.298885	0.727	0.544	1.30501e-79	3	Kdelr2
Acadvl	1.42254e-83	0.260601	0.727	0.525	2.03324e-79	3	Acadvl
Rps19	2.93461e-83	0.29341	0.947	0.871	4.19443e-79	3	Rps19
Phf5a	4.23345e-83	0.218121	0.574	0.328	6.05087e-79	3	Phf5a
Sec13	1.1868e-82	0.254726	0.81	0.616	1.6963e-78	3	Sec13
Pgp	3.79569e-82	0.22525	0.568	0.328	5.42518e-78	3	Pgp
Zfand5	1.22962e-81	0.204328	0.477	0.247	1.75749e-77	3	Zfand5
Rps10	1.30251e-81	0.221604	1	0.997	1.86167e-77	3	Rps10
Cldn31	1.80857e-81	0.244148	0.915	0.817	2.58499e-77	3	Cldn3
Tmed10	2.6783e-81	0.230337	0.952	0.909	3.82809e-77	3	Tmed10
Mrps18b	5.12762e-81	0.297488	0.64	0.433	7.32891e-77	3	Mrps18b
Prelid1	6.10737e-81	0.230016	0.975	0.951	8.72926e-77	3	Prelid1
Glmp	1.22319e-80	0.241098	0.699	0.489	1.74831e-76	3	Glmp
Tmem160	2.60915e-80	0.221776	0.634	0.387	3.72926e-76	3	Tmem160
Cltb	2.93751e-80	0.249288	0.72	0.523	4.19858e-76	3	Cltb
Slc25a3	3.61755e-80	0.220233	0.97	0.946	5.17056e-76	3	Slc25a3
Tceal9	6.69208e-80	0.230087	0.605	0.36	9.56499e-76	3	Tceal9
Sult1d1	1.29279e-79	0.322435	0.575	0.361	1.84779e-75	3	Sult1d1
Ufc1	2.17041e-79	0.241229	0.822	0.645	3.10217e-75	3	Ufc1
Id31	2.78841e-79	0.565308	0.473	0.277	3.98548e-75	3	Id3
Atp6v0d1	3.17563e-79	0.228263	0.66	0.432	4.53893e-75	3	Atp6v0d1
Fkbp2	7.28947e-79	0.227253	0.947	0.869	1.04188e-74	3	Fkbp2
Psmd8	1.16883e-78	0.323547	0.858	0.702	1.67061e-74	3	Psmd8
Psmd11	1.875e-78	0.253566	0.69	0.482	2.67993e-74	3	Psmd11
Ak2	4.40298e-78	0.251031	0.792	0.603	6.29318e-74	3	Ak2
Krt18	5.62542e-78	0.300011	0.999	0.999	8.04041e-74	3	Krt18
Gspt1	9.25234e-78	0.218393	0.579	0.348	1.32244e-73	3	Gspt1
Aup1	1.24888e-77	0.233569	0.843	0.659	1.78503e-73	3	Aup1
Banf1	1.6769e-77	0.241108	0.649	0.427	2.3968e-73	3	Banf1
Rbm3	1.68134e-77	0.270352	0.713	0.512	2.40314e-73	3	Rbm3
Eif3m	1.90768e-77	0.244317	0.704	0.498	2.72665e-73	3	Eif3m
Cald1	1.95624e-77	0.277335	0.933	0.887	2.79606e-73	3	Cald1
Sypl	6.13862e-76	0.202687	0.57	0.332	8.77393e-72	3	Sypl
Tmem120a	7.85111e-76	0.235006	0.64	0.406	1.12216e-71	3	Tmem120a
Rpl24	7.85231e-76	0.210943	1	0.999	1.12233e-71	3	Rpl24
Mrps12	2.85121e-75	0.232359	0.725	0.523	4.07523e-71	3	Mrps12
Foxa3	8.76129e-75	0.262923	0.739	0.549	1.25225e-70	3	Foxa3
Trf1	3.31642e-74	0.324435	0.988	0.994	4.74016e-70	3	Trf
Pglyrp1	4.72679e-74	0.239186	0.268	0.112	6.756e-70	3	Pglyrp1
Emc7	8.1607e-74	0.235425	0.827	0.66	1.16641e-69	3	Emc7
Rps181	1.84974e-73	0.261234	0.96	0.917	2.64383e-69	3	Rps18
Id2	2.58697e-73	0.432829	0.733	0.61	3.69756e-69	3	Id2
Psmc2	5.27352e-73	0.2186	0.612	0.379	7.53744e-69	3	Psmc2
Hspa8	5.72664e-73	0.315484	0.991	0.986	8.18509e-69	3	Hspa8
Pcbp1	1.20313e-72	0.250492	0.936	0.932	1.71963e-68	3	Pcbp1
Mrfap1	4.33858e-72	0.232918	0.71	0.516	6.20114e-68	3	Mrfap1
H1f0	6.53955e-72	0.322908	0.824	0.716	9.34698e-68	3	H1f0
Ces2c1	6.72591e-71	0.312876	0.598	0.39	9.61334e-67	3	Ces2c
Cct4	2.03191e-70	0.203328	0.485	0.274	2.90421e-66	3	Cct4
Grb14	8.4758e-70	0.200528	0.402	0.207	1.21145e-65	3	Grb14
Hspd11	1.63333e-69	0.259741	0.965	0.965	2.33452e-65	3	Hspd1
Egr11	8.44919e-69	0.250719	0.578	0.372	1.20764e-64	3	Egr1
Ddit3	8.5132e-69	0.279338	0.206	0.076	1.21679e-64	3	Ddit3
Tcp1	1.09114e-68	0.228895	0.645	0.441	1.55957e-64	3	Tcp1
Srp19	2.33991e-68	0.224505	0.687	0.48	3.34443e-64	3	Srp19
Pa2g4	4.10054e-68	0.259927	0.706	0.531	5.8609e-64	3	Pa2g4
Zfp706	4.51814e-68	0.239818	0.79	0.625	6.45778e-64	3	Zfp706
Ap1s1	4.56705e-68	0.209985	0.551	0.336	6.52768e-64	3	Ap1s1
Psmd7	6.62323e-68	0.207338	0.685	0.474	9.46659e-64	3	Psmd7
Psap1	8.88e-68	0.241943	0.717	0.546	1.26922e-63	3	Psap
Tspan4	1.1005e-67	0.217594	0.584	0.373	1.57295e-63	3	Tspan4
Afp	1.84135e-67	1.23623	0.736	0.718	2.63184e-63	3	Afp
Snrpb	7.8762e-67	0.219527	0.609	0.403	1.12575e-62	3	Snrpb
Eef1d	9.62144e-67	0.235778	0.885	0.778	1.37519e-62	3	Eef1d
Timm17b	1.14809e-66	0.208881	0.764	0.582	1.64096e-62	3	Timm17b
Serpina10	1.86265e-66	0.229419	0.729	0.543	2.66229e-62	3	Serpina10
1300017J02Rik1	9.42585e-66	0.232024	0.887	0.705	1.34724e-61	3	1300017J02Rik
Rpl10	1.17913e-65	0.2531	0.872	0.68	1.68533e-61	3	Rpl10
Cfl1	1.63583e-65	0.218043	0.924	0.878	2.33809e-61	3	Cfl1
Leap2	1.02505e-64	0.2403	0.408	0.213	1.4651e-60	3	Leap2
Paics	2.98466e-64	0.20662	0.54	0.325	4.26598e-60	3	Paics
Tcea1	4.16115e-64	0.249092	0.691	0.512	5.94753e-60	3	Tcea1
Phlda1	3.02444e-63	0.241254	0.367	0.19	4.32284e-59	3	Phlda1
Tpm1	3.85973e-63	0.238057	0.76	0.593	5.51671e-59	3	Tpm1
Lonp2	5.32046e-63	0.229344	0.674	0.492	7.60454e-59	3	Lonp2
Rps201	1.16146e-62	0.204183	1	0.997	1.66008e-58	3	Rps20
Arl4a	3.03802e-62	0.204364	0.347	0.176	4.34224e-58	3	Arl4a
Grpel1	3.84647e-62	0.226439	0.923	0.892	5.49775e-58	3	Grpel1
Reep3	4.1653e-62	0.200492	0.681	0.483	5.95347e-58	3	Reep3
Idh2	1.21864e-61	0.238131	0.736	0.572	1.7418e-57	3	Idh2
Mlf2	2.42416e-61	0.204311	0.857	0.695	3.46485e-57	3	Mlf2
Efna11	2.6403e-61	0.304353	0.786	0.66	3.77378e-57	3	Efna1
Hspb8	9.72806e-61	0.224046	0.57	0.371	1.39043e-56	3	Hspb8
Laptm4a	1.59139e-60	0.237642	0.941	0.928	2.27457e-56	3	Laptm4a
Plg1	1.64854e-60	0.21999	0.949	0.942	2.35626e-56	3	Plg
Dnaja1	2.15809e-60	0.225636	0.804	0.653	3.08456e-56	3	Dnaja1
H3f3b	4.92273e-60	0.232761	0.984	0.974	7.03606e-56	3	H3f3b
Rhoa	1.04706e-59	0.242028	0.783	0.656	1.49657e-55	3	Rhoa
Capns1	1.32824e-58	0.237819	0.719	0.565	1.89845e-54	3	Capns1
Rpl9	3.54496e-58	0.233292	0.835	0.685	5.06682e-54	3	Rpl9
G6pc1	1.58115e-57	0.230317	0.408	0.232	2.25994e-53	3	G6pc
Fetub	3.56591e-57	0.256017	0.972	0.977	5.09675e-53	3	Fetub
Txnl1	4.80505e-57	0.21519	0.877	0.802	6.86786e-53	3	Txnl1
Cd47	5.29891e-57	0.223882	0.749	0.593	7.57373e-53	3	Cd47
2001-06-01	6.55441e-57	0.25668	0.656	0.488	9.36822e-53	3	Jun
Tmem150a	6.9397e-57	0.231841	0.754	0.615	9.91891e-53	3	Tmem150a
Sec11a	1.34595e-56	0.222031	0.754	0.599	1.92377e-52	3	Sec11a
Gtf2b	1.02334e-55	0.217179	0.656	0.491	1.46266e-51	3	Gtf2b
Slc27a21	1.44054e-55	0.304273	0.874	0.767	2.05897e-51	3	Slc27a2
Blvrb1	7.04857e-55	0.209389	0.838	0.695	1.00745e-50	3	Blvrb
Ptges3	5.02291e-54	0.21695	0.63	0.461	7.17924e-50	3	Ptges3
Ube2d2a	3.74291e-53	0.20365	0.652	0.475	5.34975e-49	3	Ube2d2a
Avpi1	6.32364e-53	0.247812	0.902	0.878	9.03838e-49	3	Avpi1
Bzw1	9.20338e-53	0.217362	0.752	0.614	1.31544e-48	3	Bzw1
Rpl13a1	1.19905e-52	0.220782	0.909	0.837	1.71381e-48	3	Rpl13a
Cers2	5.61043e-52	0.218996	0.824	0.697	8.01899e-48	3	Cers2
Fam3c	6.06302e-52	0.22429	0.615	0.451	8.66588e-48	3	Fam3c
Ifi27l2b1	1.03219e-51	0.226921	0.974	0.98	1.47531e-47	3	Ifi27l2b
Rpl10-ps31	1.80707e-51	0.240994	0.895	0.853	2.58284e-47	3	Rpl10-ps3
S100a11	5.85823e-51	0.376667	0.568	0.392	8.37317e-47	3	S100a11
Cyp2c50	1.50588e-50	0.230876	0.224	0.103	2.15236e-46	3	Cyp2c50
Rps9	1.66676e-50	0.230128	0.949	0.909	2.3823e-46	3	Rps9
Rpl12	2.1158e-50	0.205157	0.796	0.633	3.02412e-46	3	Rpl12
Serpina3n	6.27181e-50	0.391596	0.732	0.656	8.9643e-46	3	Serpina3n
Npm1	1.57507e-49	0.317657	0.719	0.582	2.25124e-45	3	Npm1
Ddit41	3.15793e-49	0.308885	0.348	0.195	4.51362e-45	3	Ddit4
Rps121	5.08382e-49	0.254864	0.903	0.826	7.2663e-45	3	Rps12
Chka1	5.25536e-49	0.22421	0.537	0.372	7.51149e-45	3	Chka
Acadl	1.68183e-47	0.21209	0.836	0.74	2.40383e-43	3	Acadl
Rhoc	1.94998e-47	0.270722	0.781	0.671	2.78711e-43	3	Rhoc
Arf4	1.05633e-46	0.23172	0.897	0.908	1.50981e-42	3	Arf4
Hmgcs2	1.17928e-46	0.274775	0.71	0.607	1.68555e-42	3	Hmgcs2
Ywhaz	1.49568e-46	0.223496	0.688	0.56	2.13778e-42	3	Ywhaz
Acox1	2.61469e-44	0.232006	0.7	0.567	3.73718e-40	3	Acox1
Naca	1.77474e-43	0.204053	0.972	0.966	2.53663e-39	3	Naca
Ier21	3.73163e-42	0.255553	0.818	0.777	5.33363e-38	3	Ier2
Cdk2ap2	1.80468e-41	0.233716	0.874	0.842	2.57943e-37	3	Cdk2ap2
Ech1	1.67876e-39	0.213911	0.709	0.587	2.39946e-35	3	Ech1
Bax	6.36311e-37	0.201931	0.53	0.369	9.09479e-33	3	Bax
Lcn21	6.41522e-37	0.32261	0.984	0.966	9.16927e-33	3	Lcn2
Tnfrsf12a	7.24186e-37	0.246263	0.69	0.595	1.03508e-32	3	Tnfrsf12a
Gpi1	1.65394e-36	0.235976	0.735	0.606	2.36397e-32	3	Gpi1
Fabp2	4.27188e-35	0.217006	0.482	0.32	6.1058e-31	3	Fabp2
Mt21	1.57572e-34	0.301745	0.645	0.556	2.25218e-30	3	Mt2
Gstp2	1.12473e-33	0.269645	0.25	0.138	1.60758e-29	3	Gstp2
Fos1	2.85539e-32	0.284791	0.679	0.59	4.08121e-28	3	Fos
Ifrd11	4.10891e-32	0.342887	0.562	0.45	5.87287e-28	3	Ifrd1
Ces2a	1.22752e-30	0.208993	0.538	0.427	1.75449e-26	3	Ces2a
Hamp	2.99629e-30	1.44222	0.391	0.303	4.28259e-26	3	Hamp
Tagln2	8.25182e-29	0.23624	0.756	0.671	1.17943e-24	3	Tagln2
Mug11	2.127e-28	0.238859	0.84	0.882	3.04012e-24	3	Mug1
Tmsb10	1.88265e-27	0.435155	0.499	0.381	2.69087e-23	3	Tmsb10
Anxa5	1.47262e-25	0.30362	0.884	0.944	2.10481e-21	3	Anxa5
Sprr1a	7.9277e-17	0.881621	0.114	0.062	1.13311e-12	3	Sprr1a
Saa1	9.89305e-17	0.334574	0.196	0.126	1.41401e-12	3	Saa1
Angptl81	7.73978e-08	0.490078	0.706	0.812	0.00110625	3	Angptl8
Cxcl11	5.79678e-07	0.344014	0.563	0.588	0.00828534	3	Cxcl1
Tat1	7.00318e-07	0.244904	0.811	0.929	0.0100096	3	Tat
Mbl2	0.000442885	0.27805	0.43	0.425	1	3	Mbl2
