# Supplementary material for: Lineage tracing and single-cell analysis reveal proliferative Prom1+ tumour-propagating cells and their dynamic cellular transition during liver cancer progression
Source: HighWire-hosted journal article supplement (doi:10.1136/gutjnl-2021-324321), 2021-09-29
Supplement: gutjnl-2021-324321supp007_data_supplement.xlsx [file gutjnl-2021-324321supp007_data_supplement.xlsx]

## Sheet: Common
Gapdh
Serpina1b
Fth1
Ahsg
Ppib
Ubb
Rbp4
Rpl29
Itm2b
Prdx1
Nme2
Krt18
Atp6v0c
Kng1
Ppia
Serpina1d
Pcbd1
Edf1
Uba52
Eif5a
Ssr4
Rpl9-ps6
Ftl1
Atp5d
Tmem176b
Rpl13
Rps4x
Cyb5a
Chchd2
Rpl8
Cfi
Rpl19
Azgp1
Rplp0
Gstp1
Rps2
Grhpr
Ninj1
Bsg
Cope
Ldha
Selenop
Mpc1
Rpsa
Tpi1
Rpl11
Rpl24
F2
Spcs2
Rpl18a
Actb
Rpl10a
Pdia6
Lcn2
Tmem37
Tmem205
Ifitm3
Igfbp1
Gpx4
Arpc1b
Cd302
Atp5c1
Rpl18
Krtcap2
Sdhb
Cd81
Tst
Mdh1
Prelid1
Ddt
Rpl3
Atp5g3
Gabarap
P4hb
Iscu
Spcs1
Fdps
Fga
Naca
Hrg
Uqcrfs1
Clu
Rpl28
Grpel1
Laptm4a
Rps7
Hpx
Rps11
Slc35b1
Serpina3m
Cfb
Prdx6
Rpl15
Rps3
Ifi27l2b
Rpl14
Tubb2a
Hspa8
Rps3a1
C8g
Proc
Cyc1
Oaz1
Atp5g2
Dad1
Prdx3
Eif4ebp1
Pfn1
Eif3i
Pold4
Aldh2
Elob
Calm1
Fau
Cyp2c70
Dap
D8Ertd738e
Cldn3
Psmb3
Hsp90ab1
Rpl32
Ttc36
Ass1
Echs1
Serpinc1
Hsd3b7
Pgk1
Eif3h
Rnh1
Hp
Mdh2
Ambp
Prdx5
Pnpla7
Esd
H2-Q10
Apom
Uqcrc1
Ttr
Cyb5r3
Aes
Ssr2
Txn2
Tmed10
Ifitm2
Glud1
Pcbp1
Gng5
Rps5
Arf1
Sec13
Apoa1
Psma3
Tmem14c
Ppa1
Atox1
Arpc2
Atp5g1
Rpl7a
Pdia3
Serpind1
Akr7a5
Rpl6
Rtraf
Aup1
Prdx2
Psmb1
Tmem176a
Kng2
Cnbp
Serpina1e
Comt
Mrpl17
Tmed2
Ybx1
Eef1d
Atp5b
Akr1a1
Serf2
Rer1
Agt
Fah
Rcl1
Slc6a13
Slc25a39
Myl12a
Prdx4
Scp2
Hint1
Swi5
Ostc
Hsd17b10
Rpl10-ps3
Ctsz
Mif
Fgg
Psmb6
Rpl26
1110008F13Rik
Dnajc3
Ifi27
Apoc1
Ndufs3
Tecr
Cib1
Aldoa
Fetub
Adh5
Gstz1
Mgst1
Selenok
Rpl36al
Ugt1a1
Hacd2
Gstt1
Rps24
Eif6
Serpina3k
Park7
Avpi1
Phb2
Cox8a
Tspo
Tagln2
Hmgcl
Tmbim4
Etfa
Txnl1
H3f3a
Ebp
Gamt
Btf3
Mettl26
Arf4
Fkbp2
Ube2v1
C4bp
Rps10
Mvb12a
Rnf181
Agpat2
Sec61b
Cox5b
Ly6e
Cdk2ap2
Chchd10
Ap2m1
Mlf2
Myl12b
Psmb5
Selenbp1
Vkorc1
Slc25a47
Vdac2
Hsd17b2
Ech1
Pgam1
Arf5
2005-03-01
Rhod
Nedd8
Tmem59
Acadl
Ahcy
Ctsl
Lgals9
Rps16
Reep6
Aldob
Mrpl30
Rpl36
Hmgn1
Pemt
Slc27a2
Sigmar1
Atp5f1
1300017J02Rik
Atp5o.1
Timm23
Cideb
Vps28
Sumo2
Ppp1ca
Stoml2
Uox
Pgls
Cops6
Lrg1
Nr0b2
Fgb
Sar1b
Fh1
Fkbp11
Crip2
Phyh
Rdh7
Eno1
Coa3
Xbp1
Apof
Gnmt
Angptl8
Cox5a
Qprt
Cfhr2
Anxa5
Ccs
Ran
Spp2
S100a10
Csnk2b
Gsta3
Hagh
Ndufa7
Atp6v0b
Cycs
Actg1
Cd63
Lap3
Cpb2
Oaf
Ergic3
Fads2
Acp1
Eif1
Mrpl42
Mtch2
Serping1
Gstm7
Asgr1
Apcs
Gsta4
Qdpr
Fabp5
Hist1h2bc
Ndufa13
Snx3
Rida
Naxe
Taldo1
Manf
Atp5j
Tuba1c
Apoh
Cd9
Fbxo6
Tstd1
Psme2
Ndufv2
Sod2
Uqcrb
Gstm6
Nit2
Cst3
Mettl7b
Asgr2
Sephs2
Serpinf1
Cyp2a12
Hgfac
Gpx1
Slc25a5
Rarres2
Tnfsf13
Vdac3
Idh3b
Vps29
Vtn
Cox4i1
Ndufab1
Masp2
Mrpl12
Hpd
Rdh16f2
Erg28
Sult1a1
Gchfr
Sc5d
Cyp2a4
Cyp2c68
Bst2
F10
Orm1
Tdo2
Apoa2
Tm7sf2
Glyat
Haao
Cyp2d26
Aadac
Iah1
Apoc3
Echdc3
Herpud1
Acp5
Ugt2b5
Pglyrp2
Hadh
Urah
Car8
Serpina12
Pxmp2
Ndufa4
Mpc2
Angptl3
Fdft1
Agxt
Hebp1
Slc10a1
Fabp1
Acat1
Fbp1
Dbi
2001-03-01
Suclg1
Gnb2
Tm6sf2
Alad
Vapa
Myl6
H2-T22
Khk
H2afz
Clta
Psma4
Bphl
Rhoc
Tpt1
Cox7b
Rps26
Ssu72
H3f3b
Selenow
Vamp8
Glmp
Psmd8
Lamtor1
Cbr1
Ndufb8
Fis1
Psma2
Pfdn5
Eef1a1
Pmvk
Ube2d3
Hao1
Lect2
Emc4
Tmem150a
Perp
Cpn1
Ost4
Litaf
Arl1
Slc25a17
Trmt112
Pnrc1
Nipsnap3b
Fxyd1
Ugt2b36
Psmb8
Atp6v0e
Map2k2
Smdt1
Ndufa11
Eci1
Cisd1
Ndufs7
Tufm
Bloc1s1
Psmb2
Gstt3
2410015M20Rik
Gss
Mrps24
Gfer
Gcsh
Tm4sf4
Arpc5l
Bag1
Timm17b
Akr1c18
Pla2g12b
Ddost
Sap18
Gabarapl2
Blvrb
Clpp
Tubb4b
Glo1
H2-Ke6
Tnfrsf12a
Commd3
Arpc3
Eif3f
Ndufv1
Vmp1
Acads
Lamtor2
Dgat2
Adk
Ndfip1
Mad2l2
Rps18
Igfbp2
Ufc1
Idh2
Ier2
Ccl9
Gdi2
Mrpl20
Sra1
Erh
Foxa3
Creg1
Aldh8a1
Mrps34
Rps20
Rhoa
Cnpy2
Mrpl14
Aspdh
Sec61g
Tomm22
Kdelr1
Sdhd
Spr
H2afj
Fkbp1a
Mrpl28
Polr1d
Rps6
Ndufb5
Abhd5
Ndufb11
Rogdi
Ndufs8
Mrps18b
Rps15a
Glrx3
Yif1a
Tm2d3
Cox6b1
U2af1
Alb
Rpl34
Pmpcb
Tmem208
Cfl1
Cox7a2
Npc2
Gadd45gip1
Bccip
Ptma
Idh1
Mup20
Mrps16
Dhrs1
Hsd3b3
Dynlrb1
Grina
Galk1
Ndufa10
Cmbl
Rbp1
Derl1
Hmgb1
Srm
Mup3
Tspan31
Capns1
Sec11a
Stk16
Ywhaq
Krcc1
Gclm
Phb
Sqor
Tm2d2
Tubb5
Gtf2b
Gnpnat1
Rbx1
Aurkaip1
Sptssa
Psma6
Mea1
Mettl9
Mrpl15
Mrps15
Psme1
Hsbp1
Ppdpf
Cd1d1
Psmc2
Pter
Hsd11b1
Guk1
Derl2
Dctn3
Rpl27
Zfp706
Ndufa6
Msrb1
Timm13
Skp1a
Ift20
Capzb
Ndufa8
Bola3
Tmem97
Ranbp1
Ddah1
Ndufb9
Ndufb4
Ddrgk1
Plscr1
Mgst3
Uqcrc2
Map1lc3b
Pebp1
Rexo2
Ghitm
Serpina11
Eif3k
Akr1c6
Ndufb10
Ctsa
Dcxr
Ifnar2
Rasgrp2
Mrps7
Fam162a
Sdf4
Ndufb6
Atp6v1f
Rpl21
Smagp
Rnase4
Atp6v1g1
Gpi1
1110008P14Rik
Smim20
Isca2
Pdcd6
Mrap
0610009B22Rik
1810008I18Rik
Mrpl43
Mrpl58
Gjb2
Psma7
Kxd1
Ndufs5
Ndufs2
Pomp
Tmem234
Rpl31
Rheb
Rps14
Slc22a18
Mthfs
Sec11c
Upb1
Eif4e2
Timm8b
Echdc2
Smim14
Ctsh
Hsd17b12
Sdf2l1
Creld2
Mrps18a
Stub1
Mtx2
Anxa4
Gstm2
Tmem120a
Cltb
Cela1
Aig1
Tmem147
Txndc17
Dhrs4
Psmd4
Trappc1
Pdzd11
1810058I24Rik
Sat1
Cmtm8
Cers2
Ak2
Cebpb
Mthfsl
Hnrnpf
Bri3
Mrps14
Psmd7
Ly6d
Cystm1
A2ml1
Psmc4
Serpina3n
Arl6ip5
Emc7
Atp6v1e1
Grcc10
Ccdc124
Ccdc107
Reep5
Tmem50a
Ppa2
Mrpl22
Tmem126a
Mocs2
Mrpl54
Chmp2a
Psenen
Tmem167
Med28
Pa2g4
Cstb
Anxa2
2007-09-01
Mrpl50
Kdelr2
Erp44
Uqcc2
Atxn10
Slc9a3r1
Sh3glb1
Cct7
Gng12
Cct5
Ak6
Nipsnap1
Med29
Mrpl35
Psmd12
Cenpx
Mrps10
Tfg
Snu13
Ube2f
Emc6
Slc31a1
Adrm1
Pdcd5
Erp29
Akr1c20
Slc48a1
Fam96a
Rac1
Rap1a
Srp14
Pnkd
Rbm3
BC004004
Paip2
Rab11a
Ndfip2
Ube2i
Eif2s1
Chchd3
Tmem258
C1qbp
Ube2l3
Mpdu1
Atp6v0d1
Pgrmc1
Nudc
Mrpl55
S100a11
Isg15
Glrx5
Cox19
Mrps17
Ociad2
Snrpd2
Cd47
Mydgf
Aprt
Fabp2
Eif3m
BC031181
Rpl7
Selenof
Nudt4
Spint2
Cyp2d22
Nenf
Ube2n
Pon1
Timm8a1
Dnajb11
Psma5
Vti1b
Fgl1
Cnih1
Mrpl21
Bcap31
Ces2a
Lamtor4
Rab4a
Mrpl34
Fam210b
0610012G03Rik
Srp72
Jtb
Nt5c
Chmp2b
Adipor1
Sqstm1
Afp
Serpina10
Pam16
Cxcl1
Gstm3
Znhit1
Gstm1
Sfr1
Mrps12
Rex1bd
Slpi
Cct8
Lman2
Rps19
Ang
Cyp2d9
Pgm2
Tbrg1
Cxcl13
Hspb8
Mbl2
Mt1
Cyp1a2

## Sheet: C3
0610037L13Rik
8430408G22Rik
Akr1b3
Akr1b7
Alg5
Anapc16
Arhgdia
Arpc1a
Arpc4
Asna1
Atf5
Babam2
Btg3
C1rl
Calr
Cct4
Cd14
Cda
Cdc37
Cdc42ep5
Chd9
Chid1
Coq2
Coq9
Ctsd
Cyp2a22
Cyp2d40
Ddx39
Dpm2
Dus1l
Edem2
Eef1g
Eif3d
Eif5
Exosc5
Fars2
Fbxw9
Fibp
Get4
Gmppb
Gorasp2
Gpc3
Gps1
Gstp2
H13
Hax1
Hdlbp
Hexa
Hnrnpa1
Id1
Id2
Ifngr1
Ifrd2
Imp3
Isyna1
Junb
Kyat1
Lman1
Ltbr
Mgat2
Mpg
Mrps26
Mrto4
Mtap
Nans
Nfkbib
Npdc1
Nr2c2ap
Nudt22
Nupr1
Oat
Ogfod2
P2rx4
Pdia4
Pglyrp1
Pgm3
Phlda1
Pir
Plbd1
Plin2
Plpp5
Pno1
Ppp4c
Ppt2
Psat1
Psmd13
Rab4b
Rack1
Rbm42
Rnf186
Rnf187
Rpn2
Saraf
Selenom
Serpina6
Serpina7
Serpinb6a
Sgta
Slc13a3
Smap1
Sprr1a
Spryd4
Stt3a
Tax1bp1
Tmed3
Tmed4
Tmed9
Tnfaip8l1
Tnfrsf1a
Tomm40
Trabd
Tsg101
Tsr3
Tsta3
Uba5
Ubald2
Ucp2
Vamp4
Wasl
Wbp1
Yrdc

## Sheet: C0
March1
Asah1
Atf3
Bex1
Cyp4f14
Gck
Gdf15
Lipa
Mid1ip1
Mtx1
Mvd
Selenbp2
Tmem53
Tor1a
Unc119

## Sheet: C2
A430005L14Rik
Abracl
Acbd6
Adi1
Agxt2
Akr1c13
Aldh7a1
Alg14
Anapc11
Anp32a
Arpc5
Atg3
AY036118
Bcas2
Bet1
Bex3
Brix1
Cacybp
Cbr3
Cbs
Cdc26
Cdc42
Cebpzos
Cetn3
Cfdp1
Cfl2
Coa6
Cops5
Copz2
Cript
Cutal
Dazap2
Decr2
Dynlt1b
Dynlt3
Echdc1
Eef1akmt1
Eif1ax
Eny2
Ergic1
Ethe1
Fam103a1
Fam213b
Fam32a
Fam96b
Fdx1
Fdx1l
Ftl1-ps1
Fxn
Ggct
Ginm1
Glrx
Glrx2
Gm11789
Gm27216
Golga7
Gsta2
Gsto1
Hcfc1r1
Hikeshi
Hnrnpab
Hnrnpk
Idnk
Irf7
Kmo
Lamtor5
Lypla1
Lyplal1
Mcts1
Med21
Mpp1
Mrpl32
Mrps35
Mrps6
Ndufa9
Nudt7
Nxf1
Ola1
Otc
Pcbd2
Pcyt2
Pecr
Pigyl
Prodh2
Psmb7
Psmc1
Pts
Pttg1
Pttg1ip
Pxmp4
Rab18
Rnaset2a
Rnaset2b
Rnf13
Rnf5
Rpl23
Rwdd1
Sdhaf4
Shmt2
Snrpd1
Snrpd3
Srp9
Ssbp1
St3gal4
Stx8
Tcea3
Tcn2
Tmem141
Tmem238
Tmem30a
Tmem70
Trir
Ttpa
Ube2a
Ube2e3
Ube2v2
Vamp5
Ywhah
Zap70
Zcrb1
Zfand6

## Sheet: C1
Atp5l
Cox6c
Hamp
mt-Co2
Rps23
Slirp
Tff3
Ufm1
Uqcr11
